1        **SWI/SNF antagonizes SIR heterochromatin to promote transcription of genes expressed**  
2                                    **during mitotic exit in *Saccharomyces cerevisiae***

3

4    Mayuri Rege<sup>1,2</sup>, Jessica L. Feldman<sup>1</sup>, Nicholas L. Adkins<sup>1</sup>, and Craig L. Peterson<sup>1,3</sup>

5

6

7

8

9

10

11

12    <sup>1</sup> Program in Molecular Medicine, University of Massachusetts Medical School

13    373 Plantation Street, Biotech 2, Suite 210, Worcester, MA 01605

14

15    <sup>2</sup>Current Address: DST-INSPIRE faculty, Department of Microbiology, Ramnarain Ruia

16    Autonomous College, Matunga, Mumbai- 400019, India

17

18    <sup>3</sup>Corresponding author

19 Running Title: SWI/SNF antagonizes SIR heterochromatin

20

21 Key Words: SWI/SNF, heterochromatin, transcription, pseudo-diploid, SIR, INO80, HST

22

23 Corresponding author:

24 Craig L. Peterson

25 373 Plantation Street, Biotech 2, Suite 210, Worcester, MA 01605

26 Email: [craig.peterson@umassmed.edu](mailto:craig.peterson@umassmed.edu); Ph#508-856-5858

27

28 **ABSTRACT:**

29 Heterochromatin is a repressive, specialized chromatin structure that is central to eukaryotic  
30 transcriptional regulation and genome stability. In the budding yeast, *Saccharomyces cerevisiae*,  
31 heterochromatin formation requires Sir2p, Sir3p, and Sir4p, and these Sir proteins create  
32 specialized chromatin structures at telomeres and silent mating type loci. Previously, we reported  
33 that the SWI/SNF chromatin remodeling enzyme can evict Sir3 from chromatin fibers *in vitro*,  
34 though whether this activity contributes to the role of SWI/SNF as a transcriptional activator at  
35 euchromatic loci is unknown. Here, we characterize genetic interactions between the *SIR* genes  
36 (*SIR2*, *SIR3*, and *SIR4*) and genes encoding subunits of the chromatin remodelers SWI/SNF and  
37 INO80C, as well genes encoding the histone deacetylases Hst3 and Hst4. We find that loss of *SIR*  
38 genes partially rescues the growth defects of *swi2*, *ino80*, and *hst3/hst4* mutants during replication  
39 stress conditions. Interestingly, partial suppression of *swi2*, *ino80*, and *hst3 hst4* mutant  
40 phenotypes is due to the pseudo-diploid state of *sir* mutants, but a significant portion is due to  
41 more direct functional interactions. Consistent with this view, transcriptional profiling of strains  
42 lacking Swi2 or Sir3 identifies a set of genes whose expression in the M/G1 phase of the cell cycle  
43 requires SWI/SNF to antagonize the repressive impact of Sir3.

44

## 45 INTRODUCTION

46 Eukaryotic genomes are packaged with positively charged histone proteins to form chromatin.  
47 Chromatin can be divided into two functional categories: transcriptionally active euchromatin and  
48 transcriptionally silent heterochromatin. In budding yeast, heterochromatic structures are formed at  
49 each telomere and the two silent mating type loci (*HMR* and *HML*). The assembly of  
50 heterochromatin domains requires the binding of non-histone proteins to the chromatin fiber, and  
51 in yeast these are Sir2, Sir3 and Sir4 (Rusche *et al.* 2003; Rusché *et al.* 2002). Sir3 is believed to  
52 be the structural component of yeast heterochromatin, whereas Sir2 is a histone deacetylase that  
53 functions with Sir4 to target Sir proteins to the proper genomic locations. Deletion of *SIR* genes  
54 leads to expression of both  $\alpha$ - and  $\alpha$ -specific genes in haploids, producing a pseudo-diploid state  
55 (Haber 1998). Previous studies have found that this pseudo-diploid state alters the DNA damage  
56 response, alleviating the genotoxic stress phenotypes of several *rad* mutants (Schild 1995;  
57 Valencia-Burton *et al.* 2006).

58 In addition to heterochromatic regions, Sir3 has also been detected by chromatin  
59 immunoprecipitation studies at euchromatic locations, although the functional implications are not  
60 understood (Radman-Livaja *et al.* 2011). Immunofluorescence studies of Sir3 have also revealed  
61 that Sir3 forms discrete nuclear puncta for most of the cell cycle, except for a diffuse nuclear  
62 staining pattern during mitotic stages (Laroche *et al.* 2000). Overexpression of Sir3 can lead to the  
63 expansion of heterochromatin domains and gene-silencing defects within euchromatin (Taddei *et*  
64 *al.* 2009; Holmes *et al.* 1997), indicating that aberrant binding of Sir3 to euchromatic sites can be  
65 detrimental.

66 ATP-dependent chromatin remodeling enzymes are a major contributor to the dynamic  
67 nature of chromatin. They modify chromatin structure by mobilizing or disrupting nucleosomes in

68 an ATP-dependent reaction (Clapier and Cairns 2009). The SWI/SNF chromatin remodeling  
69 enzyme is a founding member of this group of enzymes (Smith and Peterson 2005), and subunits  
70 of SWI/SNF were first identified in yeast genetic studies as global activators of transcription  
71 (Peterson *et al.* 1992; Laurent *et al.* 1991). For instance, inactivation of the Swi2 ATPase subunit  
72 leads to defects in the transcription of many inducible yeast genes, as well the function of many  
73 transcriptional activators. Strains harboring mutations in genes encoding SWI/SNF subunits have  
74 severe growth defects, are sensitive to DNA damaging or replication stress agents, and show a  
75 defect in mitotic exit (Krebs *et al.* 2000). Similar to other remodeling enzymes, SWI/SNF can use  
76 the energy of ATP hydrolysis to mobilize nucleosomes in cis, or evict nucleosomal H2A/H2B  
77 dimers as well as entire histone octamers from DNA. Recently, we also found that SWI/SNF has  
78 the novel ability to catalyze the displacement of the Sir3 protein from nucleosomal substrates *in*  
79 *vitro*. This activity is not shared with other remodeling enzymes, and it requires a direct  
80 interaction between the Swi2 subunit and Sir3. This activity appears to be important for cells to  
81 contend with replication stress (Manning and Peterson 2014).

82 In this work, we report genetic interactions between the gene encoding the Swi2 subunit of  
83 SWI/SNF and genes encoding the Sir2, Sir3, and Sir4 heterochromatin components. Inactivation of  
84 Sir3 alleviated the slow growth phenotype of a *swi2Δ* strain, and partially restored resistance to the  
85 replication stress agent, hydroxyurea (HU). Deletion of *SIR2* or *SIR3* also partially suppressed the  
86 replication stress phenotypes caused by loss of the INO80C chromatin remodeling complex as well  
87 as the loss of the H3 lysine 56-specific histone deacetylases Hst3 and Hst4. Interestingly, in some  
88 cases partial suppression of genotoxic stress phenotypes were observed in pseudo-diploid cells,  
89 suggesting indirect as well as direct impacts of Sir3 loss. To identify potential transcriptional  
90 targets for the SWI/SNF-Sir3 antagonism, we characterized the transcriptional profile of *swi2Δ*,

91 *sir3Δ*, and *swi2Δ sir3Δ* strains. A parallel analysis was also performed in *SIR3* and *sir3Δ* strains  
92 where Swi2 was conditionally depleted from the nucleus by the anchor away method (Haruki *et al.*  
93 2008). This latter method circumvented transcriptional defects due to the severe growth phenotype  
94 of the *swi2Δ* strain, and together identified a common set of genes where SWI/SNF promotes  
95 transcription by antagonizing Sir3.

96

## 97 MATERIALS AND METHODS:

### 98 Yeast growth media and genetic methods

99 Yeast were cultured using standard procedures (Rege *et al.* 2015). For tetrad analysis, at least 30  
100 tetrads were dissected for segregation analysis and growth rates noted.

101

### 102 List of strains

| Name   | Genotype                                                                                                                                |
|--------|-----------------------------------------------------------------------------------------------------------------------------------------|
| CY1653 | <i>BY4743; MATa/a ;his3Δ1/his3Δ1; leu2Δ0/leu2Δ0; lys2Δ0/LYS2; MET15/meura3Δ0/ura3Δ0; swi2::KanMX4/SWI2 sir3Δ:: HPH<sup>R</sup>/SIR3</i> |
| CY1618 | <i>MAT (a) segregant from CY1653, clone 15A, sir3Δ::HPH</i>                                                                             |
| CY1619 | <i>MAT (a) segregant from CY1653, clone 15B, swi2Δ::KANMX and sir3Δ::HPH</i>                                                            |
| CY1620 | <i>MAT a segregant from CY1653, clone 15C (wild type)</i>                                                                               |
| CY1621 | <i>MAT a segregant from CY1653, clone 15D, swi2::KANMX</i>                                                                              |
| CY1809 | <i>Y40345 MATa tor1-1 fpr1::loxP-LEU2-loxP RPL13A-2x FKB12::loxP (HH)</i>                                                               |
| CY1810 | <i>Y40362 MATa tor1-1 fpr1::NAT RPL 13A-2x FKB12::TRP1 SNF2-FRB:kan</i>                                                                 |
| CY1853 | <i>MAT a sir3Δ::HYGRO<sup>R</sup> in CY1809, clone 1</i>                                                                                |
| CY1854 | <i>MAT a, sir3Δ::HYGRO<sup>R</sup> in CY1810, clone 16</i>                                                                              |
| CY1953 | <i>MATa sir2Δ::HIS in CY1885, clone 12</i>                                                                                              |

|        |                                                                                                                                        |
|--------|----------------------------------------------------------------------------------------------------------------------------------------|
| CY1954 | <i>MATa sir2Δ::HIS in CY1810, clone 10</i>                                                                                             |
| CY1907 | <i>MATa/a ;his3Δ1/his3Δ1; leu2Δ0/leu2Δ0; lys2Δ0/LYS2; MET15/met15Δ0; ura3Δ0/ura3Δ0; swi2::KanMX4/SWI2 sir2Δ:: HPH<sup>R</sup>/SIR2</i> |
| CY1908 | <i>MATa/a ;his3Δ1/his3Δ1; leu2Δ0/leu2Δ0; lys2Δ0/LYS2; MET15/met15Δ0; ura3Δ0/ura3Δ0; swi2::KanMX4/SWI2 sir4Δ:: HPH<sup>R</sup>/SIR4</i> |
| CY1752 | <i>MATa/α CY927 X CY971; sir3Δ::HYGRO<sup>R</sup>, diploid 2</i>                                                                       |
| CY2041 | <i>swi2Δ in W303, spore 21A dissected from CY1752</i>                                                                                  |
| CY2042 | <i>sir3Δ in W303, spore 21B dissected from CY1752</i>                                                                                  |
| CY2043 | <i>WT in W303, spore 21C dissected from CY1752</i>                                                                                     |
| CY2044 | <i>swi2Δ sir3Δ in W303, spore 21D dissected from CY1752</i>                                                                            |
| CY2394 | <i>Y40345 MATa tor1-1 fpr1::loxP-LEU2-loxP RPL13A-2×FKBP12::loxP (H bar1Δ::HISG RPB3-FLAG:NAT</i>                                      |
| CY2395 | <i>Y40345 MATa tor1-1 fpr1::loxP-LEU2-loxP RPL13A-2×FKBP12::loxP (H bar1Δ::HISG HST3-FRB:kanMX6 hst4Δ::HPH RPB3-FLAG:NAT</i>           |
| CY1838 | <i>Y40345 MATa tor1-1 fpr1::loxP-LEU2-loxP RPL13A-2×FKBP12::loxP (H bar1Δ::HISG INO80-FRB:His3MX6</i>                                  |
| CY2478 | <i>MATa sir3Δ::PHL in CY2395</i>                                                                                                       |
| CY2479 | <i>MATa sir2Δ::PHL in CY2395</i>                                                                                                       |
| CY2186 | <i>MATa sir2Δ::KanMX in CY1838</i>                                                                                                     |
| CY2162 | <i>MATa sir3Δ::KanMX in CY1838</i>                                                                                                     |
| CY2190 | <i>MATa sir4Δ::KanMX in CY1838</i>                                                                                                     |
| CY2254 | <i>ino80::KanMX sir3::Hygro<sup>R</sup> clone 1D, segregant from CY 2249</i>                                                           |
| CY2252 | <i>ino80::KanMX clone 1B, segregant from CY2249</i>                                                                                    |
| CY2487 | <i>MATa nej1Δ::PHL in CY1810</i>                                                                                                       |
| CY2488 | <i>MATa rme1Δ::PHL in CY1810</i>                                                                                                       |
| CY2491 | <i>MATa pst2Δ::PHL in CY1810</i>                                                                                                       |
| CY2485 | <i>MATa nej1Δ::PHL in CY2395</i>                                                                                                       |
| CY2486 | <i>MATa rme1Δ::PHL in CY2395</i>                                                                                                       |

|        |                                  |
|--------|----------------------------------|
| CY2492 | <i>MATa pst2Δ::PHL in CY2395</i> |
| CY2495 | <i>MATa nej1Δ::PHL in CY1838</i> |
| CY2496 | <i>MATa rme1Δ::PHL in CY1838</i> |
| CY2490 | <i>MATa pst2Δ::PHL in CY1838</i> |
| CY2495 | <i>MATa nej1Δ::PHL in CY1809</i> |
| CY2496 | <i>MATa rme1Δ::PHL in CY1809</i> |
| CY2489 | <i>MATa pst2Δ::PHL in CY2394</i> |

103

| Plasmid |                                                                     |
|---------|---------------------------------------------------------------------|
| CP1212  | pAG25; CEN/ARS w/ NAT cassette. Plasmid #35121 (Addgene)            |
| CP1234  | CEN/ARS SIR3 w/ NAT cassette                                        |
| CP1     | YCp50; CEN/ARS w/ URA3 cassette                                     |
| CP1241  | pJR156 CEN/ARS <i>MATa</i> in YCp50 w/ URA3 cassette (Jasper Rine)  |
| CP1242  | pJR157s CEN/ARS <i>MATα</i> in YCp50 w/ URA3 cassette (Jasper Rine) |

104

### 105 **Chromatin Immunoprecipitation (ChIP)**

106 Yeast strains were grown in rich media with 2% glucose at 30°C and either DMSO or Rapamycin  
107 (8μg/ml final concentration) was added for 60 minutes before fixation with 1.2% formaldehyde.  
108 Cells were quenched with 2.5M glycine, centrifuged, rinsed with cold water and stored at -80°C  
109 until chromatin preparation. Chromatin preparation, immunoprecipitation and DNA extraction  
110 were performed as described in (Bennett *et al.* 2013). The anti-Sir3 antibody (1 μL for 100μL  
111 chromatin) was used to immunoprecipitate native Sir3. The anti-H3 antibody, ab1791 from Abcam  
112 (1 μL for 100μL chromatin) was used to immunoprecipitate histone H3. The *SIR3* gene was C-  
113 terminally tagged with a FLAG tag and an anti-FLAG antibody used for immunoprecipitation.

114

### 115 **Microarray sample preparation and analysis:**



116

117 Yeast strains were grown in rich media with 2% glucose at 30°C in 50 ml cultures, collected at OD  
118 = 0.8 for RNA preparation and RNA was extracted using the hot phenol method as described  
119 previously (Rege *et al.* 2015). Samples prepared as described in Welch *et al.* 2007 were hybridized  
120 to Affymetrix Yeast 2.0 arrays from four replicates of *swi2Δ* and *swi2Δ sir3Δ* strains and analyzed  
121 by limma analysis in R (Bioconductor package). Yeast strains were grown in rich media with 2%  
122 glucose at 30°C to OD = 0.6. and either DMSO or Rapamycin (8μg/ml final concentration) was  
123 added for 60 minutes and pelleted for RNA preparation (Rege *et al.* 2015). One replicate each of  
124 the *SWI2-FRB*, *SWI2-FRB sir3Δ* and *sir3Δ* arrays and corresponding WT arrays was used. Total  
125 RNA was hybridized on Affymetrix Yeast 2.0 arrays and analyzed using a log<sub>2</sub> fold change cut-  
126 off. The raw data files have been deposited on the GEO database (# in process).

127

### 128 **qRT-PCR**

129 Samples for total RNA were prepared and qRT-PCR was performed as described previously in  
130 Manning and Peterson 2014.

131

### 132 **Data Availability Statement**

133 All strains made in this study are available upon request from the Peterson lab. The lists of Group  
134 1\_KO genes and Group 1\_AA genes are given in Table S1 and Table S2, respectively. The list of  
135 Group 1 genes common in the KO and AA datasets are given in Table S3. The lists of Group 2\_KO  
136 genes and Group 2\_AA genes are given in Table S4 and Table S5, respectively. RMA normalized  
137 data obtained using GeneSpring Affymetrix Software for all the conditions and replicates are

138 provided in Tables S5 and S6. Raw microarray .CEL files have been deposited in NCBI's GEO  
139 database with the accession number (in process).

140

## 141 **RESULTS:**

### 142 **The slow growth phenotype of *swi2Δ* is partially rescued by *sir3Δ***

143 An isogenic set of wildtype, *sir3Δ*, *swi2Δ*, and *swi2Δ sir3Δ* strains was created by tetrad dissection  
144 from a *swi2Δ/SWI2 sir3Δ/SIR3* heterozygous diploid. Deletion of *SIR3* partially suppresses the  
145 growth defect of *swi2Δ* on rich media (Figure 1A), suggesting that these loci genetically interact.  
146 Importantly, this suppression segregates with markers for the double mutant after tetrad analysis,  
147 eliminating the possibility that a nonspecific, background suppressor causes the growth  
148 suppression in *swi2Δ sir3Δ* strains (Figure 1A). We also find that the growth defects of *swi2Δ* are  
149 suppressed by *sir3Δ* in a different strain background (w303; Figure 1B). In addition to slow growth  
150 on glucose media, *swi2Δ* mutants are unable to metabolize alternative carbon sources like  
151 raffinose, galactose, glycerol, or ethanol (Abrams *et al.* 1986; Carlson *et al.* 1981). Inactivation of  
152 Sir3 did not facilitate growth of a *swi2Δ* on raffinose, but limited suppression was observed for  
153 growth on media containing galactose, ethanol, or glycerol (Figure 1C). *SWI2* is also required for  
154 resistance to replication stress, induced by hydroxyurea (HU), and a *swi2Δ* shows a delayed  
155 growth rate in this condition (Sharma *et al.* 2003). Interestingly, deletion of *SIR3* partially relieves  
156 the HU sensitive phenotype of a *swi2Δ* (Figure 1C). Thus, a subset of *swi2Δ* phenotypes are  
157 alleviated by deletion of *SIR3*.

158 To completely eliminate the possibility that a background mutation other than the *sir3Δ*  
159 segregated with, and caused the growth suppression seen in the double mutant, we transformed the  
160 *swi2Δ sir3Δ* with a plasmid containing *SIR3* expressed from its endogenous promoter. As

161 expected, complementation with a vector plasmid had no impact on growth, while the *SIR3*  
162 plasmid slowed the growth of the *swi2Δ sir3Δ* strain (Figure 1D). Given that *sir3Δ* suppresses the  
163 severe growth defects of *swi2Δ* in multiple strain backgrounds, and that this suppression can be  
164 reversed when *swi2Δ sir3Δ* is complemented by a *SIR3* plasmid, these data suggest that SWI/SNF  
165 antagonizes Sir3 *in vivo*.

166

### 167 **Absence of *SIR2* does not suppress *swi2Δ* growth defects**

168 Given that *SIR3* shows negative genetic interactions with *SWI2*, we asked whether genes that  
169 encode other Sir proteins, Sir2 and Sir4, also showed similar genetic interactions. Sir2 is a histone  
170 deacetylase (HDAC) that promotes Sir3 binding to nucleosomes by removing the acetyl group on  
171 histone H4 lysine 16. Sir4 forms a complex with Sir2, and it is believed to play a key role in  
172 targeting Sir proteins to telomeres and HM loci (Rusché *et al.* 2002; Thurtle and Rine 2014).  
173 Unlike deletion of *SIR3*, inactivation of Sir2 did not alleviate the slow growth of the *swi2Δ* (Figure  
174 S1A, B). In contrast, inactivation of Sir4 suppresses the growth defect of a *swi2Δ* mutant (Figure  
175 S1C, D). Thus, the studies support genetic interactions between *SWI2*, *SIR3*, and *SIR4*, but not  
176 *SIR2*.

177

### 178 **Comparison of *swi2Δ* alleles with conditional depletion of Swi2**

179 As *swi2Δ* null mutants are extremely slow growing, we wanted to establish an alternative approach  
180 to interrogate the genetic interactions between *SIR* genes and *SWI2*. To this end, the anchor away  
181 system was used to conditionally deplete Swi2 from the nucleus (Haruki *et al.* 2008). The parent  
182 strain harbors a FK506 binding protein (FKBP12) tag fused to the C-terminus of an anchor protein,  
183 RPL13A. RPL13A is a ribosomal protein that is present in high copy numbers in the cell and

184 transits from the nucleus to the cytoplasm during ribosome assembly, as shown in Figure 2A. In  
185 this parent strain, we tagged the endogenous *SWI2* locus at the C-terminus with the FKBP12-  
186 rapamycin-binding (FRB) domain. Rapamycin induces formation of a ternary complex between  
187 the FKBP12 and FRB domains, and thus, rapidly depletes *SWI2*-FRB from the nucleus (Figure  
188 2A).

189 We first compared growth rates of *SWI2*-FRB strains with or without the *SIR3* gene using  
190 spot assays. In the presence of DMSO solvent, growth rates of all strains are identical on rich  
191 media (Figure 2B), indicating that the *SWI2*-FRB fusion itself does not impair Swi2 function. In  
192 the presence of rapamycin, *SWI2*-FRB strains show a decrease in growth rate compared to the WT,  
193 consistent with nuclear depletion of Swi2 (Figure 2B). However, the *SWI2*-FRB strains have a  
194 milder growth defect compared to the *swi2Δ* (null) mutant (Figure 1), perhaps due to residual Swi2  
195 present in the nucleus. Similar to the *swi2Δ*, depletion of *SWI2* also causes HU sensitivity, and this  
196 phenotype is partially suppressed by deletion of *SIR3*, suggesting an important link between Swi2  
197 and Sir3 during replication stress (Figure 2B). Unlike the case with a deletion allele of *SWI2*,  
198 deletion of *SIR2* also partially suppressed the sensitivity of the *SWI2*-FRB strain (+Rap) to HU,  
199 but to a lesser extent than deletion of *SIR3* (Figure 2B).

200 Previous work has shown that *SWI2* is required for transcriptional activation of the  
201 ribonucleotide reductase (RNR) genes in the presence of HU (Sharma *et al.* 2003). Consistent with  
202 this, we see a large reduction of these transcripts in the *swi2Δ* (Figure S1E, F). However, unlike the  
203 rescue of growth, the lower levels of RNR transcripts was not restored by the *sir3Δ* following  
204 depletion of Swi2. This observation suggests that in HU stress, SWI/SNF may antagonize Sir3  
205 independent of transcription, possibly by assisting replication within SIR heterochromatin.  
206

207 **Deletion of *SIR2* or *SIR3* suppresses growth defects of *ino80* and *hst3/hst4* mutants**

208 To investigate whether the suppression of growth defects by loss of Sir proteins is unique to  
209 SWI/SNF or a more common feature among chromatin modifying enzymes, we determined if  
210 deletion of *SIR2* and *SIR3* suppresses the growth defects caused by nuclear depletion of the histone  
211 H3 deacetylases, Hst3 and Hst4 (*Hst4Δ/HST3-FRB*), or the chromatin remodeler, INO80C  
212 (*INO80-FRB*). In the presence of rapamycin, both the *Hst4Δ/HST3-FRB* and *INO80-FRB* strains  
213 grow similarly to WT, but they are sensitive to stress conditions, such as when media contains  
214 camptothecin (CPT) or HU (Figure 2C, D). Strikingly, deletion of either *SIR2* or *SIR3* suppresses  
215 the growth defects caused by rapamycin-dependent depletion of either Ino80 or Hst3/Hst4 in the  
216 presence of HU or CPT (Figure 2C, D). Similarly, deletion of *SIR3* also partially suppresses an  
217 *ino80Δ* strain (Figure S2), confirming the results observed with INO80 anchor away. Thus, in  
218 addition to *SWI2*, the *SIR* genes also show genetic interactions with *HST3/HST4*, and *INO80*.

219

220 **Genotoxic stress is partially suppressed by *MAT* heterozygosity**

221 Our genetic studies suggest that SWI/SNF, INO80C, and Hst3/Hst4 antagonize Sir proteins during  
222 replication stress. SIR heterochromatin prevents expression of the silent mating type loci, and  
223 consequently, loss of Sir proteins leads to expression of diploid-specific genes and suppression of  
224 haploid-specific genes (Rine and Herskowitz 1987; Goutte and Johnson 1988; Herskowitz 1989;  
225 Dranginis 1990). This pseudo-diploid state, in which both the MAT $\alpha$  and MAT $\alpha$  genes are  
226 expressed, is termed the *MAT* heterozygotic state. *MAT* heterozygosity has been shown to suppress  
227 the DNA repair defects of *rad* mutants (Valencia-Burton *et al.* 2006). Indeed, both MAT  
228 heterozygosity and *sir* mutants downregulate NHEJ and preferentially use HR for DNA repair  
229 (Valencia-Burton *et al.* 2006). To determine whether loss of Sir proteins suppresses replication

230 stress phenotypes in a direct manner or an indirect manner due to pseudo-diploid effects, we  
231 investigated the impact of *MAT* heterozygosity. We introduced an episomal copy of *MAT* $\alpha$  into the  
232 *MATa* anchor away strains to generate *MATa/MAT* $\alpha$  haploids. Interestingly, *MAT* heterozygosity  
233 partially suppressed the sensitivity of *SWI2-FRB* (+ Rap) during HU stress (Figure 3A), though the  
234 suppression was less than what was observed by deletion of *SIR3* (Figure 2B). In contrast, *MAT*  
235 heterozygosity did not suppress sensitivity of *SWI2-FRB* (+Rap) to CPT (Figure 3A). The  
236 sensitivity of the *hst4* $\Delta$ /*HST3-FRB* and *INO80-FRB* mutants to CPT, and to a lesser extent HU,  
237 was also partially suppressed by *MAT* heterozygosity (Figure 3B, C). Taken together, the results  
238 indicate that the replication stress sensitivity of strains depleted for Swi2, Ino80, or Hst3/Hst4 can  
239 be partially suppressed by *MAT* heterozygosity, either by deletion of *SIR* genes or by expressing  
240 the opposite mating type in haploid strains. However, the extent of suppression by the pseudo-  
241 diploid state is generally less than what is observed for loss of Sir proteins.

242       Expression of both *MATa* and *MAT* $\alpha$  alters the transcriptional profile by down regulating  
243 haploid-specific genes and upregulating diploid-specific genes (Herskowitz 1989). Thus, we  
244 sought to investigate which of these pathways are important for suppressing replication stress  
245 phenotypes. Previous work has shown that deletion of the haploid-specific gene *NEJ1*, required for  
246 non-homologous end joining (NHEJ), suppressed the growth defect of *rad55* $\Delta$  when exposed to  
247 DNA damage (Valencia-Burton *et al.* 2006). To determine whether loss of NHEJ also suppresses  
248 the phenotypes due to loss of chromatin modifiers, we deleted *NEJ1* in the anchor away strains.  
249 Deletion of *NEJ1* did not suppress the growth defects of *SNF2-FRB*, *hst4* $\Delta$ /*HST3-FRB*, or *INO80-*  
250 *FRB* mutants when grown on rapamycin in the presence of HU or CPT (Figure S3A). We next  
251 tested the impact of two additional haploid-specific genes, *RME1* or *PST2*, which show genetic  
252 interactions with *RAD55* and *RAD51* during growth on CPT stress (Valencia-Burton *et al.* 2006).

253 However, deletion of either *RME1* or *PST2* did not suppress the HU or CPT stress phenotypes of  
254 the *SWI2-FRB*, *hst4Δ/HST3-FRB*, or *INO80-FRB* (+Rap; Figure S3B, C). Thus, the underlying  
255 genetic basis for the *MAT*-dependent, partial suppression of stress phenotypes due to depletion of  
256 SWI/SNF, INO80, and Hst3/Hst4 remains unknown, though it does not appear to be due to loss of  
257 NHEJ or activation of meiotic transcriptional programs.

258

### 259 **Loss of Sir3 partially suppresses the transcriptional defects due to loss of SWI/SNF**

260 Since loss of Sir3 has a large impact on phenotypes due to loss of Swi2 than *MAT* heterozygosity,  
261 we entertained the possibility that SWI/SNF may directly antagonize transcriptional repression by  
262 Sir3 at a subset of genes. To identify such transcriptional targets, we analyzed RNA profiles of  
263 isogenic wild type, *swi2Δ*, *sir3Δ*, and *swi2Δ sir3Δ* strains for 5716 ORFs using DNA microarrays.  
264 Consistent with published data, we observed that deletion of *SIR3* mis-regulates genes in the  
265 mating type cascade, with almost no other changes (Figure 4A *middle*) (Lenstra *et al.* 2011). In  
266 contrast, *SWI2* regulates 203 genes positively (FDR < 0.1 and LFC < -0.58) and 488 genes  
267 negatively (FDR < 0.1 and LFC > 0.58) (Figure 4A *top*). Many genes whose expression is known  
268 to be dependent on SWI/SNF, such as *SER3*, *YOR222W*, and the acid phosphatase genes, were  
269 altered as predicted (Figure 4B) (Sudarsanam *et al.* 2000). However, these SWI/SNF-dependent  
270 genes were unaffected by a deletion of *SIR3* (Figure 4B, third column).

271 To identify genes that are regulated by both *SWI2* and *SIR3*, we first selected genes that  
272 changed significantly in the *swi2Δ* compared to wild type (Figure 4B), and we then performed  
273 hierarchical clustering and classified various sub-groups of interest. Genes that decrease  
274 significantly (LFC < -0.58 and FDR < 0.1) in *swi2Δ* and are restored to nearly wild type levels in  
275 the *swi2Δ sir3Δ* are defined as Group 1\_KO (Table S1). The top gene ontology (GO) term

276 category enriched in Group 1\_KO is ribosome biogenesis/ ribosomal protein coding genes. This  
277 suggests that these genes require SWI/SNF to antagonize Sir3 to promote transcription. Indeed,  
278 prior studies have reported Sir3 binding to many ribosomal protein genes, using a *GAL-SIR3*  
279 inducible strain (Radman-Livaja *et al.* 2011). However, mRNA abundance of genes involved in  
280 ribosome biogenesis/ ribosomal proteins strongly anti-correlates with cellular growth rate and may  
281 confound our results (Airoldi *et al.* 2009).

282 To circumvent potential issues due to growth defects, we also analyzed RNA profiles from  
283 the anchor away strains. Transcriptional profiling following Swi2 depletion also identified many  
284 previously known SWI/SNF-dependent genes, including *YOR222W*, *SER3*, and the acid  
285 phosphatase genes (Figure 4C). Notably, genes involved in ribosome biogenesis were not  
286 identified in the anchor away datasets, consistent with the possibility that expression of these genes  
287 are linked to growth rates. To identify genes that might be co-regulated by Swi2 and Sir3, we again  
288 selected genes that changed by 1.5 fold or more after depletion of *SWI2-FRB*, and performed  
289 hierarchical clustering to identify subsets that are co-regulated by *sir3Δ*. Genes that *decrease* (LFC  
290  $< -0.58$ ) in *SWI2-FRB* and were restored to nearly wild type levels in the *SWI2-FRB sir3Δ* were  
291 defined as Group 1\_AA (Figure 4C; Table S2). The top GO term category enriched in Group  
292 1\_AA is ion/ carbohydrate transport and primarily reflects the metabolic defects of *SWI2* mutants  
293 in carbon source utilization. The overlap between the Group1\_AA and Group1\_KO sets revealed  
294 a very select set of 28 genes that decrease following loss of SWI/SNF but are restored to nearly  
295 wildtype levels by inactivation of Sir3 (p-value of  $8.7 \times 10^{-9}$ ; Figure 5C; Hypergeometric test).  
296 This common subset of genes, consolidated as Group 1, corresponds to GO term categories of ‘cell  
297 cycle’, ‘cytokinesis’, and ‘lipid metabolism’ (Table S3). Notably, this set is enriched for genes



298 expressed at the end of mitosis, which we previously showed to be SWI/SNF-dependent (Krebs, *et*  
299 *al.* 2000).

300 Consistent with previous analyses, we also identified genes whose expression was  
301 increased by either the deletion of *SWI2* or by Swi2 nuclear depletion (Figure S4). Expression of a  
302 subset of these genes was restored to nearly wildtype levels by inactivation of Sir3, and these gene  
303 sets were designated Group 2\_KO (n= 488; LFC < -0.58 and FDR < 0.1) and Group 2\_AA (n=  
304 192; LFC < -0.58 and FDR < 0.1). (Figure 4B,C and S4A,B; Table S4 and S5). However, overlap  
305 of Group 2\_KO and Group 2\_AA datasets revealed only 11 common genes (Figure S4C),  
306 suggesting that the upregulation of genes by loss of SWI/SNF is primarily due to an indirect effect  
307 of slow growth (Holstege *et al.* 1998b; Sudarsanam *et al.* 2000).

308

### 309 **Analysis of Sir3 binding at Group 1 target genes**

310 The genetic and transcriptome analyses suggest that SWI/SNF antagonizes Sir3 to promote  
311 expression of specific genes. One prediction of this model is that Sir3 may accumulate at such  
312 target genes in the absence of SWI/SNF. To test the model, we analyzed Sir3 recruitment by  
313 chromatin immunoprecipitation (ChIP) in WT and *swi2Δ* mutants arrested in nocodazole.  
314 Nocodazole is a microtubule depolymerizing agent that blocks entry into mitosis and thus, cells  
315 accumulate at the G2/M border (Jacobs *et al.* 1988). Sir3 binding was measured using a native  
316 antibody to Sir3, as well as an anti-FLAG antibody in a strain expressing a *SIR3*-FLAG fusion  
317 from its endogenous locus. In both cases, ChIP analyses in the wild type strain demonstrated  
318 enrichment for Sir3 at the heterochromatic loci, HMR and TELVI-R. In the absence of Swi2, the  
319 occupancy of Sir3 is reduced at telomeres, consistent with a redistribution of Sir3 to ectopic loci

320 (Figure S5). However, we did not observe significant changes in Sir3 enrichment at selected  
321 euchromatic target genes (Figure S5B).

322

### 323 **DISCUSSION:**

324 Establishing a separation between euchromatin and heterochromatin domains is crucial for cell  
325 function. The mechanisms that might actively exclude heterochromatin proteins from euchromatin  
326 domains remain poorly understood. Previously, we found that the SWI/SNF complex can remove  
327 the Sir3 heterochromatin protein from chromatin fibers *in vitro*, and here, we report genetic  
328 evidence that supports a role for SWI/SNF in disrupting the ability of Sir heterochromatin proteins  
329 to repress euchromatic gene expression. In particular, this activity of SWI/SNF appears crucial for  
330 proper expression of genes expressed at the end of mitosis.

331

### 332 **Genetic interactions between chromatin modifiers and *SIR* genes**

333 Our *in vitro* studies indicated that the SWI/SNF chromatin remodeling enzyme was uniquely able  
334 to evict the Sir3 heterochromatin protein from chromatin fibers (Manning and Peterson 2014;  
335 Sinha *et al.* 2009). Here, we found that deletion of either *SIR3* or *SIR4* alleviated the growth  
336 defects of *swi2Δ* on media containing glucose, ethanol, or HU, but *sir3Δ* and *sir4Δ* did not  
337 significantly rescue the severe growth defects of *swi2Δ* on alternative carbon sources, such as  
338 raffinose or galactose. Likewise, inactivation of Sir proteins also alleviated the growth phenotypes  
339 of cells that were depleted of Swi2. Interestingly, the genetic interactions between genes encoding  
340 Sir proteins and SWI/SNF were not unique to this particular chromatin remodeler. Deletion of  
341 *SIR2* and *SIR3* also suppressed the growth defects of *ino80* and *hst3/hst4* mutants under genotoxic  
342 stress (Figure 2C, D), indicating a potential common mechanism for suppressing replication stress.

343           How does loss of Sir proteins alleviate the phenotypes of mutants that lack chromatin  
344 modifying enzymes? One possibility is that suppression is due to indirect effects caused by the  
345 pseudo-diploid state of *sir* mutant cells. Deletion of *SIR* genes induces the expression the  $\alpha 1$ - $\alpha 2$   
346 repressor, generating pseudo-diploid cells. Such haploid cells expressing both *MAT* genes show  
347 greater resistance to radiation and are more recombination proficient than cells expressing only  
348 *MAT $\alpha$*  or *MAT $\alpha$*  (Heude and Fabre 1993). We found that pseudo-diploid cells partially suppressed  
349 the phenotypes of the *INO80-FRB* and *hst4 $\Delta$ /HST3-FRB* strains to a similar level as deletion of  
350 *SIR* genes, especially for growth on CPT (Figure 3B,C), indicating the some genetic interactions  
351 between INO80C and Hst3/Hst4 with Sir proteins may be largely indirect. In contrast, although the  
352 pseudodiploid state partially suppressed the HU stress phenotype of the *SNF2-FRB* strain (Figure  
353 3A), the suppression was much less than that observed after deletion of *SIR3* (Figure 2B). This  
354 suggests there exists both a direct genetic interaction between SWI/SNF and Sir3, consistent with  
355 the ability of SWI/SNF to evict Sir3 *in vitro* (Manning and Peterson 2014), as well as an indirect  
356 interaction caused by *MAT* heterozygosity.

357

### 358 **Transcriptional profiling of *swi2 $\Delta$* and *swi2 $\Delta$ sir3 $\Delta$* strains**

359           Our transcriptional profiling data suggest that there may be at least two classes of  
360 SWI/SNF-dependent genes – those where SWI/SNF antagonizes Sir proteins, and a second group  
361 of genes that may require more “canonical” nucleosome remodeling activities. Our transcriptional  
362 profiling results are consistent with this view, as we identified many SWI/SNF-dependent genes  
363 whose transcriptional defect was not restored by loss of Sir3 and a separate set of genes where  
364 SWI/SNF appears to antagonize Sir3. Furthermore, we recently identified and characterized a  
365 separation of function allele of *SWI2* (*swi2 $\Delta$ - $\Delta$ 10R*) that generates a SWI/SNF complex that has

366 normal levels of nucleosome remodeling activity but lacks the ability to evict Sir3 from chromatin  
367 fibers. (Manning and Peterson 2014).

368 For genes where SWI/SNF appears to antagonize Sir3, our microarray analyses revealed  
369 two categories of genes – the first group includes ribosomal biogenesis and ribosomal protein  
370 coding genes and the second include genes involved in cytokinesis and cell division. Notably, the  
371 first category of genes are likely to be sensitive to growth rate and thus changes in their expression  
372 are most likely due to indirect effects (Airoidi *et al.* 2009) (Figure 5C). In contrast, genes involved  
373 in mitotic exit were identified in RNA profiles from both gene deletion strains and from the anchor  
374 away system. This suggest that defects in expression of these genes are likely to be independent of  
375 the growth defects of the *swi2* deletion strain and may be direct targets where SWI/SNF  
376 antagonizes Sir3. These data lend mechanistic insight to previous findings that SWI/SNF promotes  
377 expression of genes involved in mitotic exit and that *SWI/SNF* mutants are defective in exiting  
378 mitosis (Krebs *et al.* 2000).

379

### 380 **Genes expressed during mitosis are dependent on SWI/SNF to antagonize Sir3**

381 Why might Sir3 only impact genes that are expressed during mitosis? Cytological studies have  
382 shown that Sir3 localizes to discrete foci during the majority of the cell cycle, reflecting its  
383 heterochromatic localization (Laroche *et al.* 2000). In contrast, Sir3 shows a diffuse, nuclear  
384 staining pattern during mitosis, consistent with more promiscuous binding to both euchromatic and  
385 heterochromatic sites. However, we do not observe increased Sir3 occupancy at selected gene  
386 promoter regions by ChIP qPCR analyses in G2/M arrested cells, compared to asynchronous cell  
387 populations (Figure S5B), though a diffuse localization of Sir3 may not be detectable by ChIP-  
388 qPCR. Likewise, we did not detect changes in euchromatic Sir3 occupancy in the absence of

389 SWI/SNF, though Sir3 levels were decreased from telomeric regions, consistent with previous  
390 reports (Dror and Winston 2004; Manning and Peterson 2014) (Figure S5). Currently, we favor a  
391 model in which Sir3 delocalizes from heterochromatic sites during mitosis, leading to the binding  
392 of Sir3 to euchromatic regions, perhaps facilitated by the deacetylated state of transcribed gene  
393 coding regions. Sir3 may bind in a diffuse manner across euchromatic genes, limiting the detection  
394 of Sir3 by ChIP analyses. We envision that SWI/SNF action may be required to remove Sir3,  
395 facilitating expression of these cell cycle regulated genes. Notably, this role for SWI/SNF would  
396 be distinct from the typical nucleosome remodeling activities of SWI/SNF.  
397

398 **ACKNOWLEDGEMENTS**

399 We thank Phyllis Spatrack and the Genomics Core Facility at UMass Medical School for assistance  
400 with sample processing. The pJR156 and pJR157 *MAT* plasmids were a gift from Prof. Jasper Rine  
401 at the University of California, Berkeley. This work was supported by grants from the NIH to C.L.P.  
402 (R35 GM122519) and to J.L.F. (F32 GM119229).

403

404 **REFERENCES:**

- 405 Abrams, E., Neigeborn, L., and Carlson, M. (1986). Molecular analysis of SNF2 and SNF5, genes  
406 required for expression of glucose-repressible genes in *Saccharomyces cerevisiae*. *Mol. Cell.*  
407 *Biol.* *6*, 3643–3651.
- 408 Airoidi, E.M., Huttenhower, C., Gresham, D., Lu, C., Caudy, A.A., Dunham, M.J., Broach, J.R.,  
409 Botstein, D., and Troyanskaya, O.G. (2009). Predicting cellular growth from gene expression  
410 signatures. *PLoS Comput. Biol.* *5*, e1000257.
- 411 Bennett, G., Papamichos-Chronakis, M., and Peterson, C.L. (2013). DNA repair choice defines a  
412 common pathway for recruitment of chromatin regulators. *Nat. Commun.* *4*, 2084.
- 413 Carlson, M., Osmond, B. C., & Botstein, D. (1981). Mutants of yeast defective in sucrose  
414 utilization. *Genetics*, *98*, 25–40.
- 415 Carmen, A.A., Milne, L., and Grunstein, M. (2002). Acetylation of the yeast histone H4 N  
416 terminus regulates its binding to heterochromatin protein SIR3. *J Biol Chem* *277*, 4778–4781.
- 417 Carrozza, M.J., Li, B., Florens, L., Sukanuma, T., Swanson, S.K., Lee, K.K., Shia, W.-J.,  
418 Anderson, S., Yates, J., Washburn, M.P., *et al.* (2005). Histone H3 methylation by Set2 directs  
419 deacetylation of coding regions by Rpd3S to suppress spurious intragenic transcription. *Cell*  
420 *123*, 581–592.
- 421 Clapier, C.R., and Cairns, B.R. (2009). The biology of chromatin remodeling complexes. *Annu.*  
422 *Rev. Biochem.* *78*, 273–304.
- 423 Dranginis, A. M. (1990). Binding of yeast a1 and alpha 2 as a heterodimer to the operator DNA of  
424 a haploid-specific gene. *Nature* *347*, 682-685.

- 425 Dror, V., and Winston, F. (2004). The Swi / Snf Chromatin Remodeling Complex Is Required for  
426 Ribosomal DNA and Telomeric Silencing in *Saccharomyces cerevisiae*. *24*, 8227–8235.
- 427 Goutte, C., and A. D. Johnson. (1988). a1 protein alters the DNA binding specificity of alpha 2  
428 repressor. *Cell* *52*, 875-882.
- 429 Haber J.E. (1998). Mating-type gene switching in *Saccharomyces cerevisiae*. *Annu Rev Genet.*  
430 *1998;32:561-99.*
- 431 Haruki, H., Nishikawa, J., and Laemmli, U.K. (2008). The anchor-away technique: rapid,  
432 conditional establishment of yeast mutant phenotypes. *Mol. Cell* *31*, 925–932.
- 433 Herskowitz, I. (1989). A regulatory hierarchy for cell specialization in yeast. *Nature* *342*, 749-757.
- 434 Heude, M., & Fabre, F. (1993). a/alpha-control of DNA repair in the yeast *Saccharomyces*  
435 *cerevisiae*: genetic and physiological aspects. *Genetics* *133*, 489–498.
- 436 Holmes, S.G., Rose, A.B., Steuerle, K., Saez, E., Sayegh, S., Lee, Y.M., and Broach, J.R. (1997).  
437 Hyperactivation of the silencing proteins, Sir2 and Sir3, causes chromosome loss. *Genetics*  
438 *145*, 605–614.
- 439 Holstege, F.C., Jennings, E.G., Wyrick, J.J., Lee, T.I., Hengartner, C.J., Green, M.R., Golub, T.R.,  
440 Lander, E.S., and Young, R.A. (1998a). Dissecting the regulatory circuitry of a eukaryotic  
441 genome. *Cell* *95*, 717–728.
- 442 Holstege, F.C., Jennings, E.G., Wyrick, J.J., Lee, T.I., Hengartner, C.J., Green, M.R., Golub, T.R.,  
443 Lander, E.S., and Young, R.A. (1998b). Dissecting the Regulatory Circuitry of a Eukaryotic  
444 Genome. *Cell* *95*, 717–728.
- 445 Jacobs, C.W., Adams, A.E., Szanislo, P.J., and Pringle, J.R. (1988). Functions of microtubules in



- 446 the *Saccharomyces cerevisiae* cell cycle. *J. Cell Biol.* *107*, 1409–1426.
- 447 Keogh, M.-C., Kurdistani, S.K., Morris, S. a, Ahn, S.H., Podolny, V., Collins, S.R., Schuldiner,  
448 M., Chin, K., Punna, T., Thompson, N.J., *et al.* (2005). Cotranscriptional set2 methylation of  
449 histone H3 lysine 36 recruits a repressive Rpd3 complex. *Cell* *123*, 593–605.
- 450 Krebs, J.E., Fry, C.J., Samuels, M.L., and Peterson, C.L. (2000). Global role for chromatin  
451 remodeling enzymes in mitotic gene expression. *Cell* *102*, 587–598.
- 452 Laroche, T., Martin, S.G., Tsai-Pflugfelder, M., and Gasser, S.M. (2000). The dynamics of yeast  
453 telomeres and silencing proteins through the cell cycle. *J. Struct. Biol.* *129*, 159–174.
- 454 Laurent, B. C., Treitel, M. A., & Carlson, M. (1991). Functional interdependence of the yeast  
455 SNF2, SNF5, and SNF6 proteins in transcriptional activation. *Proc Natl Acad Sci U S A.* *88*,  
456 2687–2691.
- 457 Lenstra, T.L., Benschop, J.J., Kim, T., Schulze, J.M., Brabers, N. a C.H., Margaritis, T., van de  
458 Pasch, L. a L., van Heesch, S. a a C., Brok, M.O., Groot Koerkamp, M.J. a, *et al.* (2011). The  
459 Specificity and Topology of Chromatin Interaction Pathways in Yeast. *Mol. Cell* *42*, 536–549.
- 460 Manning, B.J., and Peterson, C.L. (2014). Direct interactions promote eviction of the Sir3  
461 heterochromatin protein by the SWI/SNF chromatin remodeling enzyme. *Proc. Natl. Acad. Sci.*  
462 *U. S. A.* *111*, 17827–17832.
- 463 Peterson, C.L. and Herskowitz, I. (1992). Characterization of the yeast SWI1, SWI2, and SWI3  
464 genes, which encode a global activator of transcription. *Cell* *68*, 573-83.
- 465 Radman-Livaja, M., Ruben, G., Weiner, A., Friedman, N., Kamakaka, R., and Rando, O.J. (2011).  
466 Dynamics of Sir3 spreading in budding yeast: secondary recruitment sites and euchromatic

- 467        localization. *EMBO J.* *30*, 1012–1026.
- 468    Rege, M., Subramanian, V., Zhu, C., Hsieh, T. H., Weiner, A., Friedman, N., Clauder-Münster, S.,  
469        Steinmetz, L. M., Rando, O. J., Boyer, L. A., & Peterson, C. L. (2015). Chromatin Dynamics  
470        and the RNA Exosome Function in Concert to Regulate Transcriptional Homeostasis. *Cell*  
471        *Rep.* *13*, 1610–1622.
- 472    Richmond, E., and Peterson, C.L. (1996). Functional analysis of the DNA-stimulated ATPase  
473        domain of yeast SWI2/SNF2. *Nucleic Acids Res* *24*, 3685–3692.
- 474    Rine, J., & Herskowitz, I. (1987). Four genes responsible for a position effect on expression from  
475        HML and HMR in *Saccharomyces cerevisiae*. *Genetics* *116*, 9–22.
- 476    Rusche, L.N., Kirchmaier, A.L., and Rine, J. (2003). The establishment, inheritance, and function  
477        of silenced chromatin in *Saccharomyces cerevisiae*. *Annu Rev Biochem* *72*, 481–516.
- 478    Rusché, L.N., Kirchmaier, A.L., and Rine, J. (2002). Ordered nucleation and spreading of silenced  
479        chromatin in *Saccharomyces cerevisiae*. *Mol Biol Cell* *13*, 2207–2222.
- 480    Schild, D. (1995). Suppression of a new allele of the yeast RAD52 gene by overexpression of  
481        RAD51, mutations in *srs2* and *ccr4*, or mating-type heterozygosity. *Genetics* *140*, 115-127.
- 482    Schwabish, M.A., and Struhl, K. (2007). The Swi/Snf complex is important for histone eviction  
483        during transcriptional activation and RNA polymerase II elongation in vivo. *Mol Cell Biol* *27*,  
484        6987–6995.
- 485    Sharma, V.M., Li, B., and Reese, J.C. (2003). SWI/SNF-dependent chromatin remodeling of  
486        RNR3 requires TAF(II)s and the general transcription machinery. *Genes Dev.* *17*, 502–515.
- 487    Sinha, M., Watanabe, S., Johnson, A., Moazed, D., and Peterson, C.L. (2009). Recombinational

488 repair within heterochromatin requires ATP-dependent chromatin remodeling. *Cell* *138*, 1109–  
489 1121.

490 Smith, C.L., and Peterson, C.L. (2005). ATP-dependent chromatin remodeling. *Curr Top Dev Biol*  
491 *65*, 115–148.

492 Sudarsanam, P., Iyer, V.R., Brown, P.O., and Winston, F. (2000). Whole-genome expression  
493 analysis of *snf/swi* mutants of *Saccharomyces cerevisiae*. *Proc Natl Acad Sci U S A* *97*, 3364–  
494 3369.

495 Taddei, A., Van Houwe, G., Nagai, S., Erb, I., van Nimwegen, E., and Gasser, S.M. (2009). The  
496 functional importance of telomere clustering: global changes in gene expression result from  
497 SIR factor dispersion. *Genome Res* *19*, 611–625.

498 Thurtle, D.M., and Rine, J. (2014). The molecular topography of silenced chromatin in  
499 *Saccharomyces cerevisiae*. *Genes Dev.* *28*, 245–258.

500 Valencia-Burton, M., Oki, M., Johnson, J., Seier, T. A., Kamakaka, R., & Haber, J. E. (2006).  
501 Different mating-type-regulated genes affect the DNA repair defects of *Saccharomyces*  
502 *RAD51*, *RAD52* and *RAD55* mutants. *Genetics* *174*, 41–55.

503 Welch, E., Barton ER, Zhuo J, Tomizawa Y, Friesen WJ, Trifillis P, Paushkin S, Patel M, Trotta  
504 CR, Hwang S, *et al.* (2007). PTC124 targets genetic disorders caused by nonsense  
505 mutations. *Nature* *447*, 87-91.

506 Wilson, C.J., Chao, D.M., Imbalzano, A.N., Schnitzler, G.R., Kingston, R.E., and Young, R.A.  
507 (1996). RNA polymerase II holoenzyme contains SWI/SNF regulators involved in chromatin  
508 remodeling. *Cell* *84*, 235–244.

509 **FIGURE LEGENDS:**

510 **Figure 1: *swi2* growth defects are partially rescued by deletion of *SIR3***

511 A) Tetrad dissection plates of the *swi2Δ/SWI2 sir3Δ/SIR3* heterozygous diploid on YEPD plates  
512 with the corresponding genotypes marked with symbols listed on the left. A single dissected spore  
513 yields an isogenic colony, imaged after 10 days. Relative size of each colony is representative of the  
514 growth rate.

515 B) Spot assay on null mutants dissected from the W303 background. Equal cell numbers were  
516 spotted in consecutive ten-fold dilutions on agar plates with 2% glucose as the carbon source and  
517 imaged after 3 days.

518 C) Spot assay was performed as described in B) with different carbon sources. Raffinose and  
519 galactose plates also contain 2% antimycin to prevent respiratory growth.

520 D) *swi2Δ sir3Δ* mutants transformed with a plasmid containing either the vector backbone (left) or  
521 with a construct expressing Sir3 from its endogenous promoter (right). Spot assays were performed  
522 on individual isolates as described in B).

523

524

525

526 **Figure 2: Absence of Sir2 or Sir3 partially suppresses phenotypes due to depletion of SWI/SNF,**  
527 **Hst3/Hst4, or INO80C**

528 A) Schematic of the Anchor-away system to induce conditional depletion of nuclear proteins. Strains  
529 contain C-terminally tagged versions of the nucleo-cytoplasmic shuttling protein (*RPL13A-*  
530 *FKBP12*; green hook) and the *SWI2* gene locus (*SWI2-FRB*; yellow star) (left panel). Addition of  
531 Rapamycin (red dot) facilitates formation of a ternary complex between FKBP12 and FRB, rapidly  
532 depleting *SWI2-FRB* from the nucleus (right panel).

533 B) Wild type, *sir2* $\Delta$ , and *sir3* $\Delta$  strains with or without the *SWI2-FRB* tag were spotted on 2% glucose  
534 media containing either DMSO solvent, 8 $\mu$ g/ml rapamycin (RAP) in the presence or absence of 0.1  
535 M hydroxyurea (HU) and then grown for 3 days at 30°C.

536 C) Spot assays as in B) for *hst4* $\Delta$ /*HST3-FRB* in the presence of or absence 0.1 M HU and 5  $\mu$ g/mL  
537 Camptothecin (CPT).

538 D) Spot assays as in B) for *INO80-FRB* in the presence or absence of 0.1 M HU and 5  $\mu$ g/mL CPT.

539

540 **Figure 3: *MAT* heterozygosity partially suppresses replication stress phenotypes due to**  
541 **depletion of chromatin regulators**

542 A) *SNF2*-FRB tag strains containing either empty vector or a vector expressing *MAT $\alpha$*  were spotted  
543 on 2% glucose media containing either DMSO solvent, 8 $\mu$ g/ml rapamycin (RAP) in the presence or  
544 absence of 5  $\mu$ g/mL Camptothecin (CPT) and 0.1 M HU, and then grown for 3 days at 30°C. Two  
545 transformants were tested.

546 B) Spot assays as in A) for *hst4 $\Delta$ /HST3-FRB* expressing *MAT $\alpha$*  grown in the presence or absence of  
547 5  $\mu$ g/mL CPT and 0.1 M HU .

548 C) Spot assays as in A) for *INO80-FRB* expressing *MAT $\alpha$*  grown in the presence or absence of 5  
549  $\mu$ g/mL CPT and 0.1 M HU .

550

551

552

553

554 **Figure 4: Whole-genome microarray analysis of *swi2Δ* and *SWI2-AA* strains.**

555 A) Volcano plots show transcripts that change significantly in the mutant compared to the wild type  
556 (WT) highlighted in blue ( $p_{\text{adj}} = \text{FDR} < 0.1$  and  $\text{Log}_2 \text{ Fold Change} > 0.59$ ).

557 B) Heatmap of normalized RNA abundance for ORFs that are significantly down-regulated ( $n=167$ )  
558 and up-regulated ( $n=488$ ) in the *swi2Δ* arrays compared to WT. Corresponding values for these  
559 genes from *swi2Δ sir3Δ* and *sir3Δ* arrays compared to WT are also shown. Group 1\_KO are defined  
560 as significantly down-regulated in the *swi2Δ* and comparatively de-repressed in *swi2Δ sir3Δ*, while  
561 Group 2\_KO are defined as significantly up-regulated in the *swi2Δ* and comparatively reduced in  
562 *swi2Δ sir3Δ*. Examples of ORFs identified in previous studies that do not change in *swi2Δ sir3Δ*  
563 compared to *swi2Δ* ( $> \pm 1.5$  fold) are listed along the right.

564 C) Heatmap of normalized RNA abundance for genes that are down-regulated ( $n=264$ ) and up-  
565 regulated ( $n=193$ ) in the *SWI2-FRB* compared to WT in the presence of  $8\mu\text{g/ml}$  of rapamycin  
566 (RAP). Corresponding values for these genes from *SWI2-FRB sir3Δ* and *sir3Δ* arrays compared to  
567 WT are also shown. ‘Group 1\_AA’ and ‘Group 2\_AA’ are defined essentially as described in B).  
568 Examples of ORFs identified in previous studies that do not change in *swi2Δ sir3Δ* compared to  
569 *swi2Δ* ( $> \pm 1.5$  fold) are listed along the right.

570

571 **Figure 5: M/G1 expressed genes are regulated by SWI/SNF in a Sir3 dependent manner in**  
572 **both the *SWI2* anchor-away and *swi2Δ* strains**

573 A) Heatmap of normalized RNA abundance for Group1\_AA ORFs (n= 263) in the *SWI2-FRB*,  
574 *SWI2-FRB sir3Δ* and *sir3Δ* arrays compared to WT in the presence of 8μg/ ml of rapamycin (RAP)  
575 after hierarchical clustering.

576 B) Heatmap of normalized RNA abundance for Group1\_KO ORFs (n= 176) in the *swi2Δ*, *swi2Δ*  
577 *sir3Δ* and *sir3Δ* arrays compared to WT after hierarchical clustering.

578 C) Venn diagram depicting the overlap of genes from Group 1\_AA and Group 1\_KO. GO terms  
579 specific and common to the knockout (KO) and anchor-away (AA) datasets are shown.

580 D) RT-qPCR analysis of select Group 1 genes identified from both the knockout and anchor-away  
581 datasets sets.

582



583 **Figure S1: Gene expression and genetic interactions of *SIR3*, *SIR2*, and *SIR4* with *SWI2*.**

584 A, B) Absence of *SIR2* does not suppress growth defects of *swi2Δ*.

585 C, D) Absence of *SIR4* suppresses the growth defects of *swi2Δ*.

586 E) Absence of *SIR3* does not impact *RNR* gene expression and genetic interactions.

587

588 **Figure S2: *ino80* growth defects are partially rescued by deletion of *SIR3***

589 A) Tetrad dissection plates of the *ino80Δ/INO80 sir3Δ/SIR3* heterozygous diploid on YEPD plates  
590 with the corresponding genotypes marked with symbols listed on the right. A single dissected spore  
591 yields an isogenic colony, imaged after 10 days. Relative size of each colony is representative of the  
592 growth rate.

593 B) Spot assay on null mutants dissected from the W303 background. Equal cell numbers were  
594 spotted in consecutive ten-fold dilutions on agar plates with 2% glucose as the carbon source in the  
595 presence or absence of 0.05 M HU, 0.1 M HU, 0.01% Methyl methanesulfonate (MMS), 0.03%  
596 MMS, 30  $\mu\text{g}/\text{mL}$  CPT, 90  $\mu\text{g}/\text{mL}$  CPT, 2.5  $\mu\text{g}/\text{mL}$  phleomycin, or 5  $\mu\text{g}/\text{mL}$  phleomycin and imaged  
597 after 3 days.

598

599

600 **Figure S3: Growth defects due to depletion of chromatin regulators are not suppressed by**  
601 **deletion of haploid-specific genes *NEJ1*, *RME1*, or *PST2***

602 A) Wild type and *nej1* $\Delta$  strains with or without the *SNF2-FRB*, *hst4* $\Delta$ /*HST3-FRB*, or *INO80-FRB*  
603 were spotted (1/10 dilutions) on 2% glucose media containing either DMSO solvent, 8 $\mu$ g/ml  
604 rapamycin (RAP) in the presence or absence of 0.1 M HU and 5  $\mu$ g/mL Camptothecin (CPT). Cells  
605 were then grown for 3 days at 30°C.

606 B) Spot assays as in A) for *rme1* $\Delta$ .

607 C) Spot assay as in A) for *pst2* $\Delta$ .

608

609

- 610 **Figure S4: Overlap of Group 2 genes (those repressed by *SWI2*) between *swi2Δ* and *SWI2***  
611 **anchor-away strains**
- 612 A) Group 2\_KO (n= 192) heatmap with strains compared to WT anchor away strain.  
613 B) Group 2\_AA (n=488) heatmap with null mutants compared to WT.  
614 C) Overlap of the number of genes from Group 2\_AA and Group 2\_KO and the corresponding GO  
615 term categories.

616 **Figure S5: ChIP analysis of Sir3 occupancy**

617 A) Chromatin immunoprecipitation (ChIP) for native Sir3 in nocodazole-arrested (G2/M boundary)

618 cells at two heterochromatic loci in WT, *sir3* $\Delta$  and *swi2* $\Delta$  cells.

619 B) ChIP for *SIR3*-FLAG in nocodazole-arrested (G2/M boundary) cells at promoters of *SWI2*

620 dependent genes in WT and *swi2* $\Delta$  cells.

621 **SUPPLEMENTARY TABLES**

622 **Table S1:** List of Group 1\_KO genes

623 **Table S2:** List of Group 1\_AA genes

624 **Table S3:** List of Group 1 genes common in the KO and AA datasets

625 **Table S4:** List of Group 2\_KO genes

626 **Table S5:** List of Group 2\_AA genes

627 **Table S6:** Complete table of RMA values from the KO datasets for all genes

628 **Table S7:** Complete table of RMA values from the AA datasets for all genes

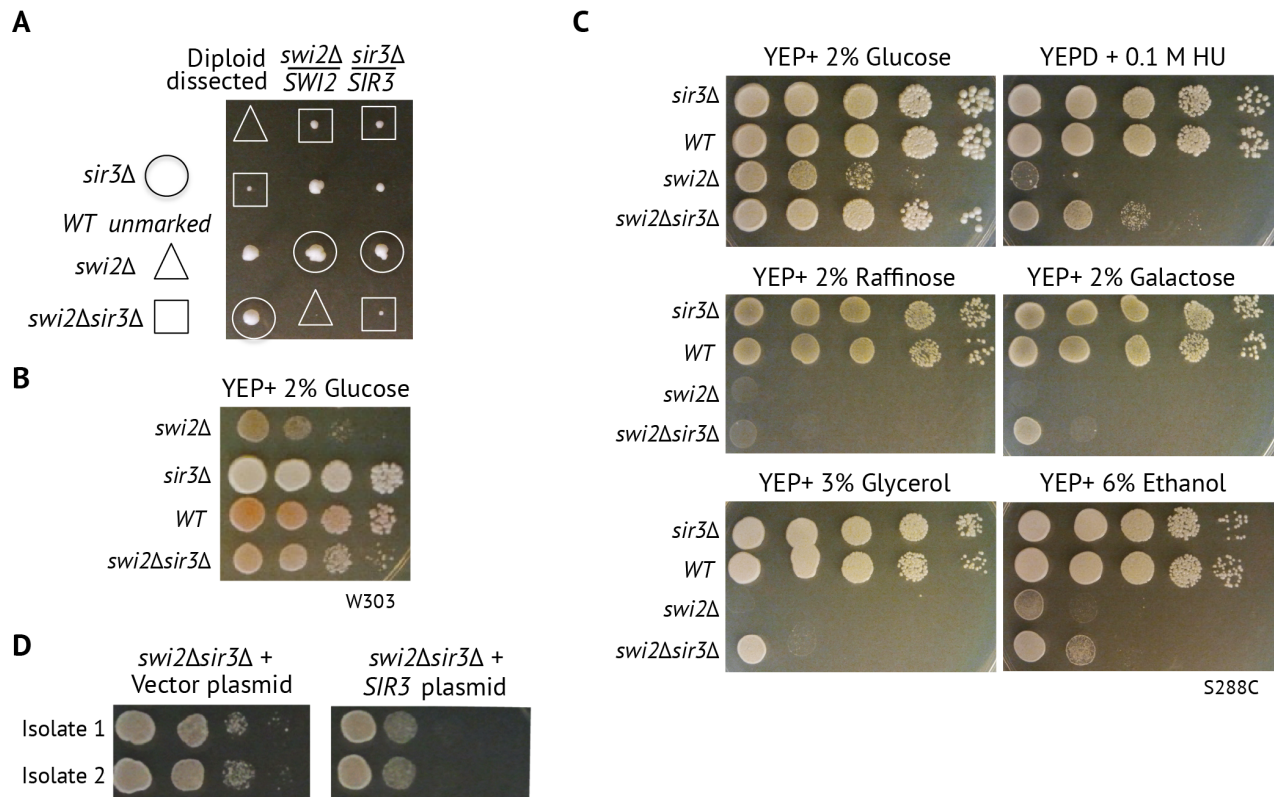

Figure 2

Rege et al

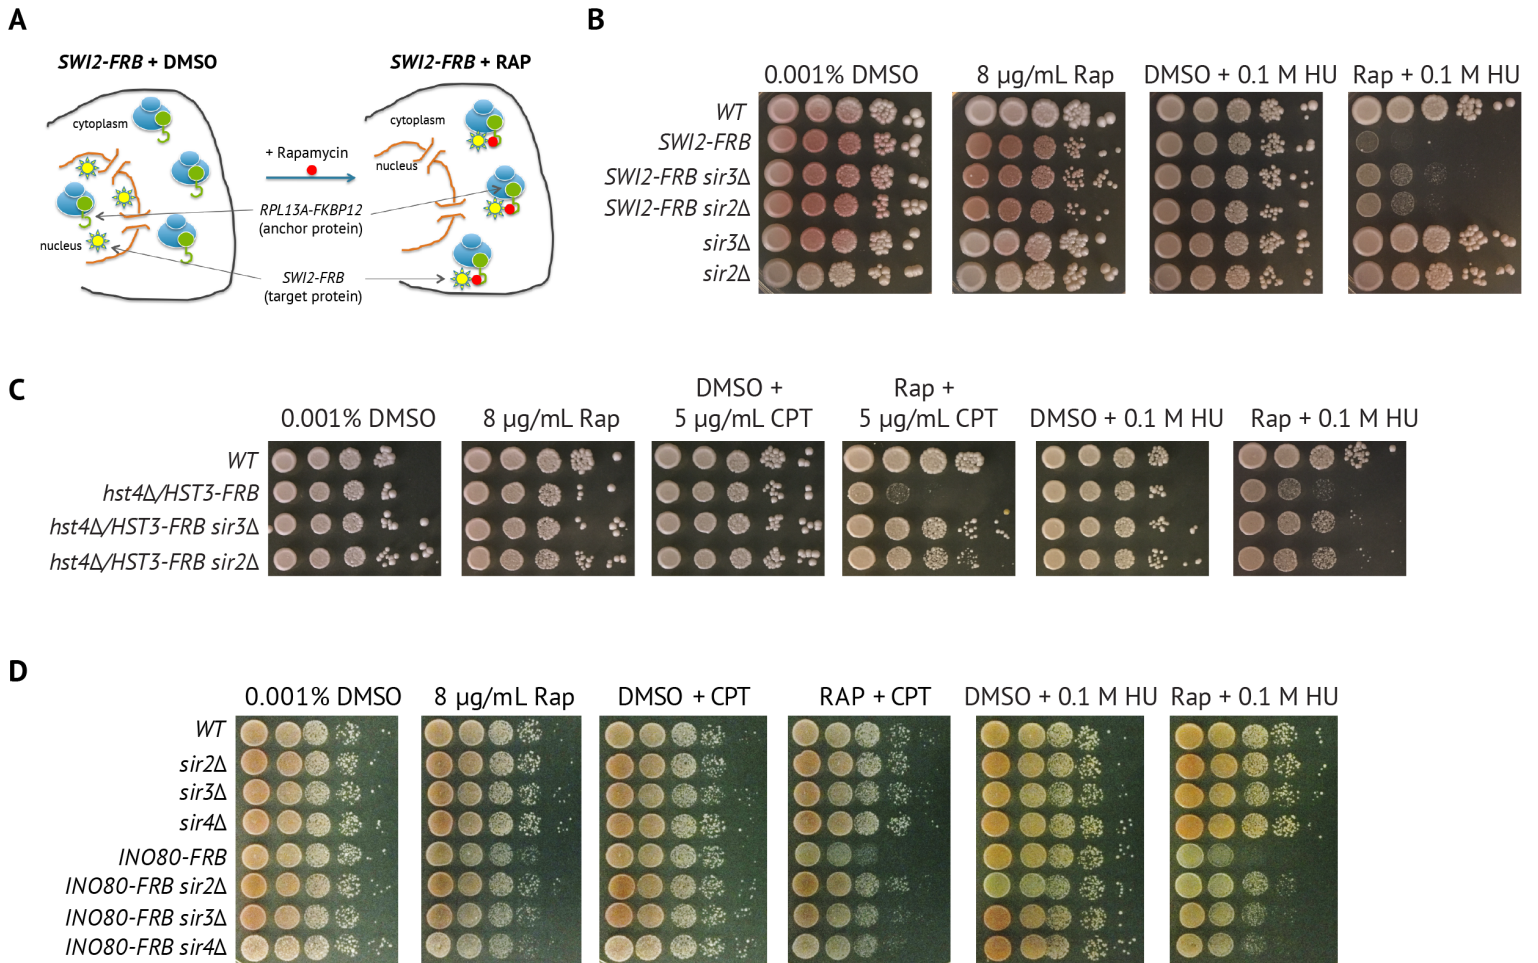



# Figure 3

Rege et al

**A**

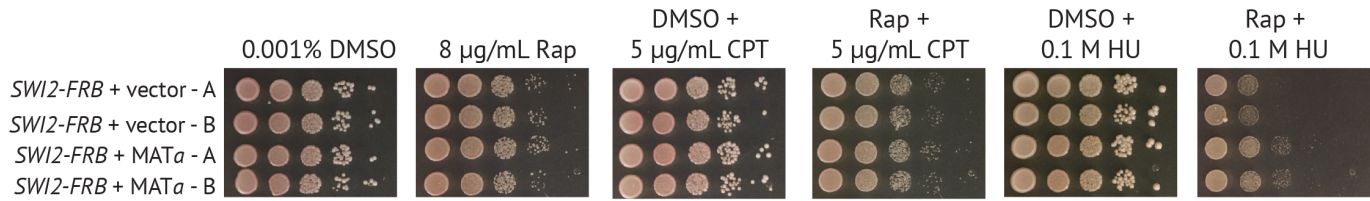

**B**

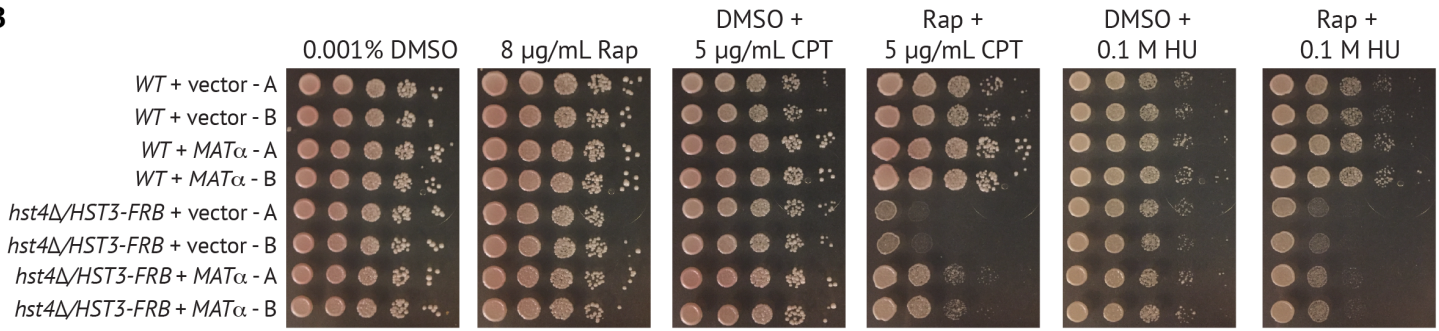

**C**

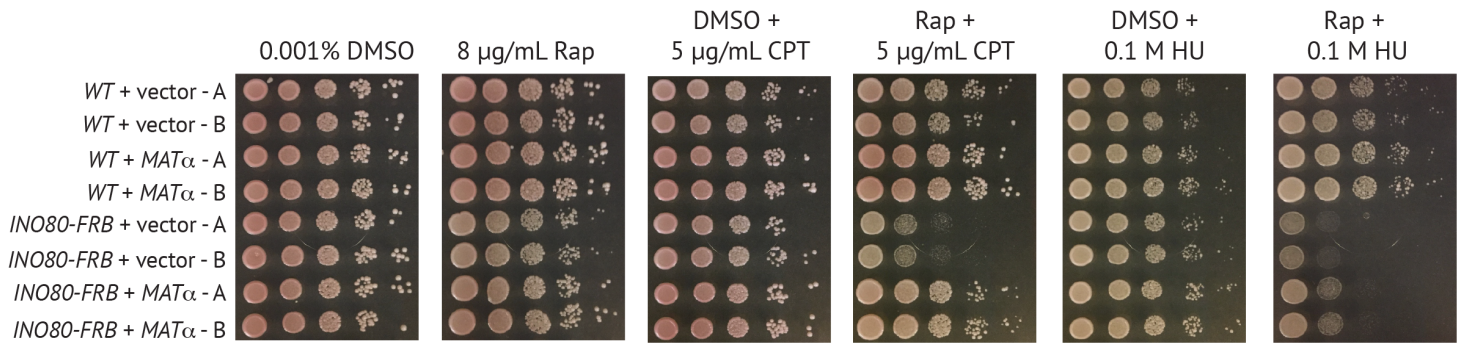

Figure 4

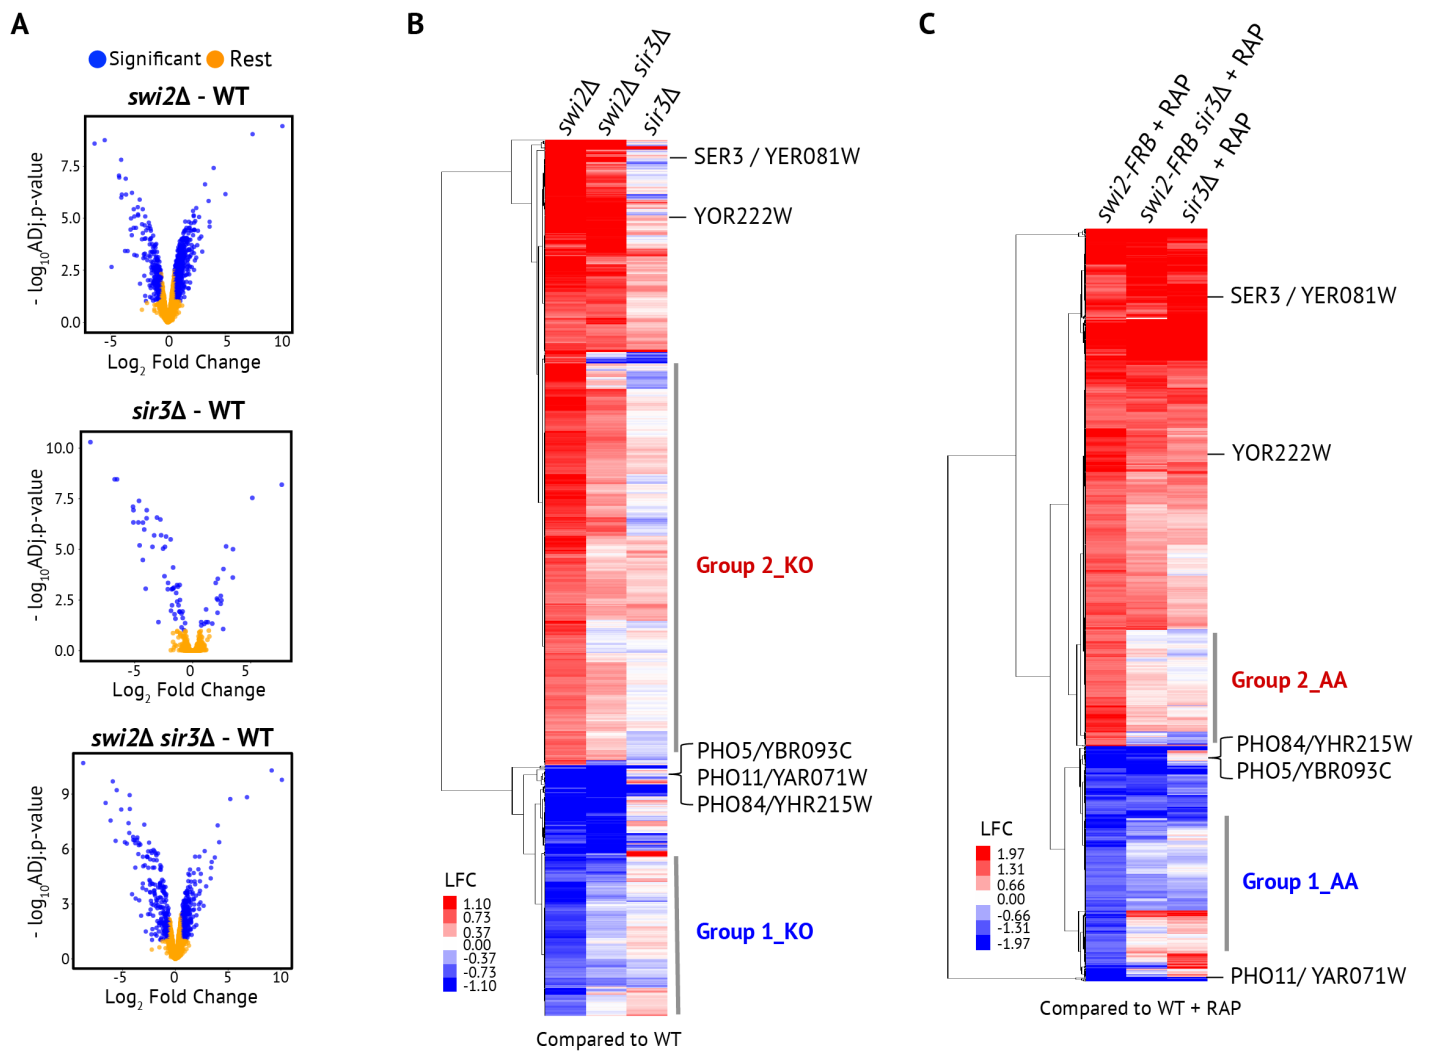

Figure 5

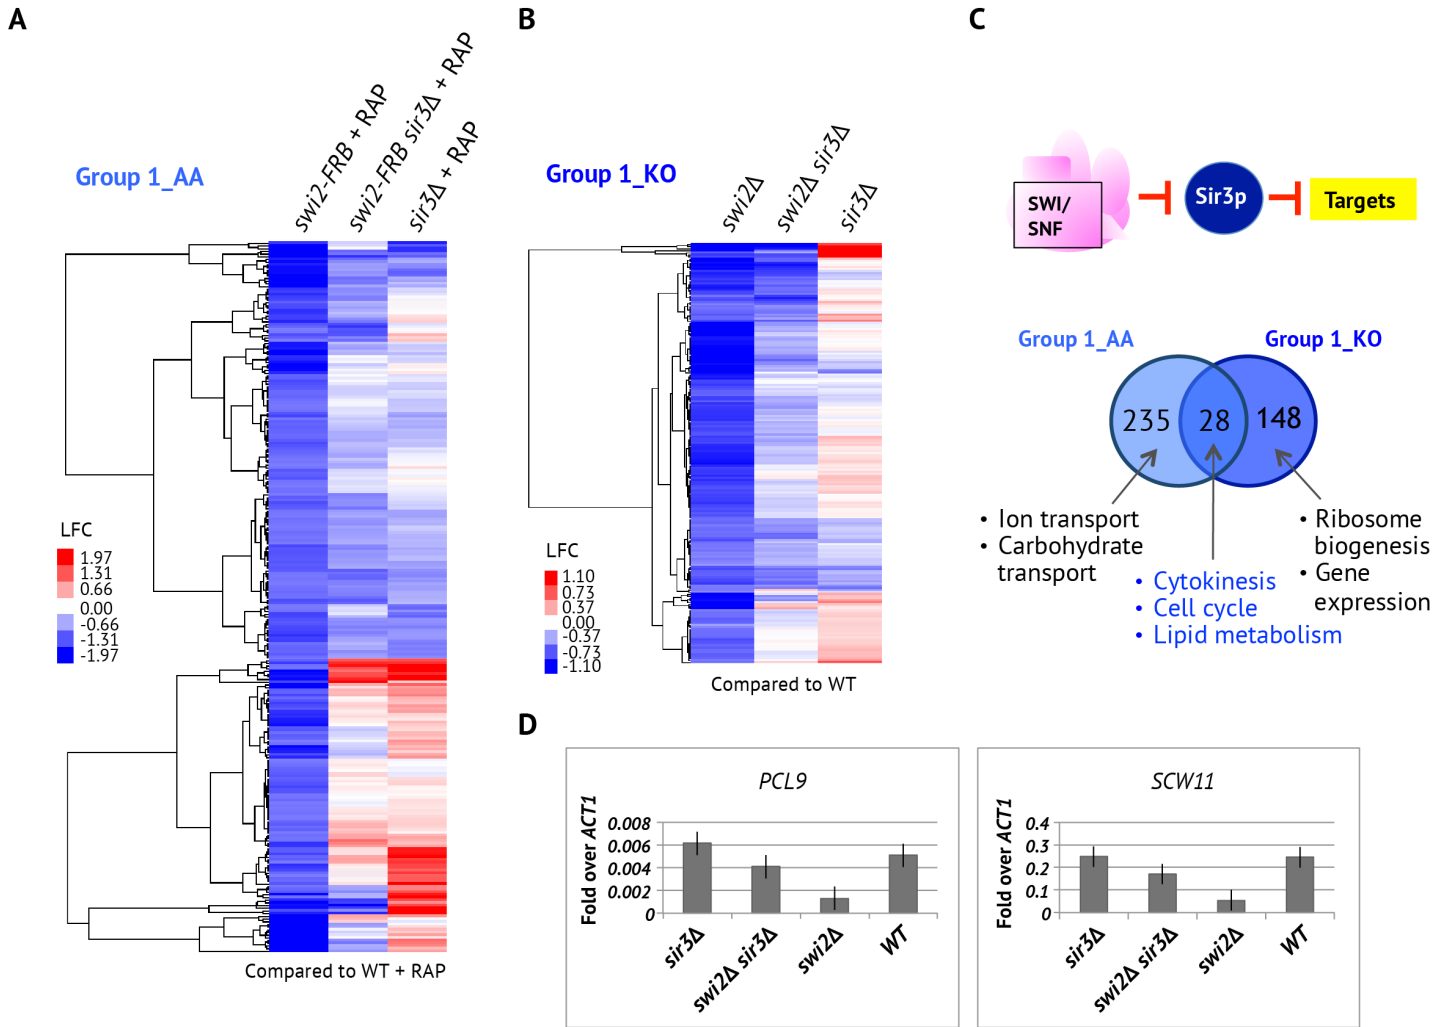

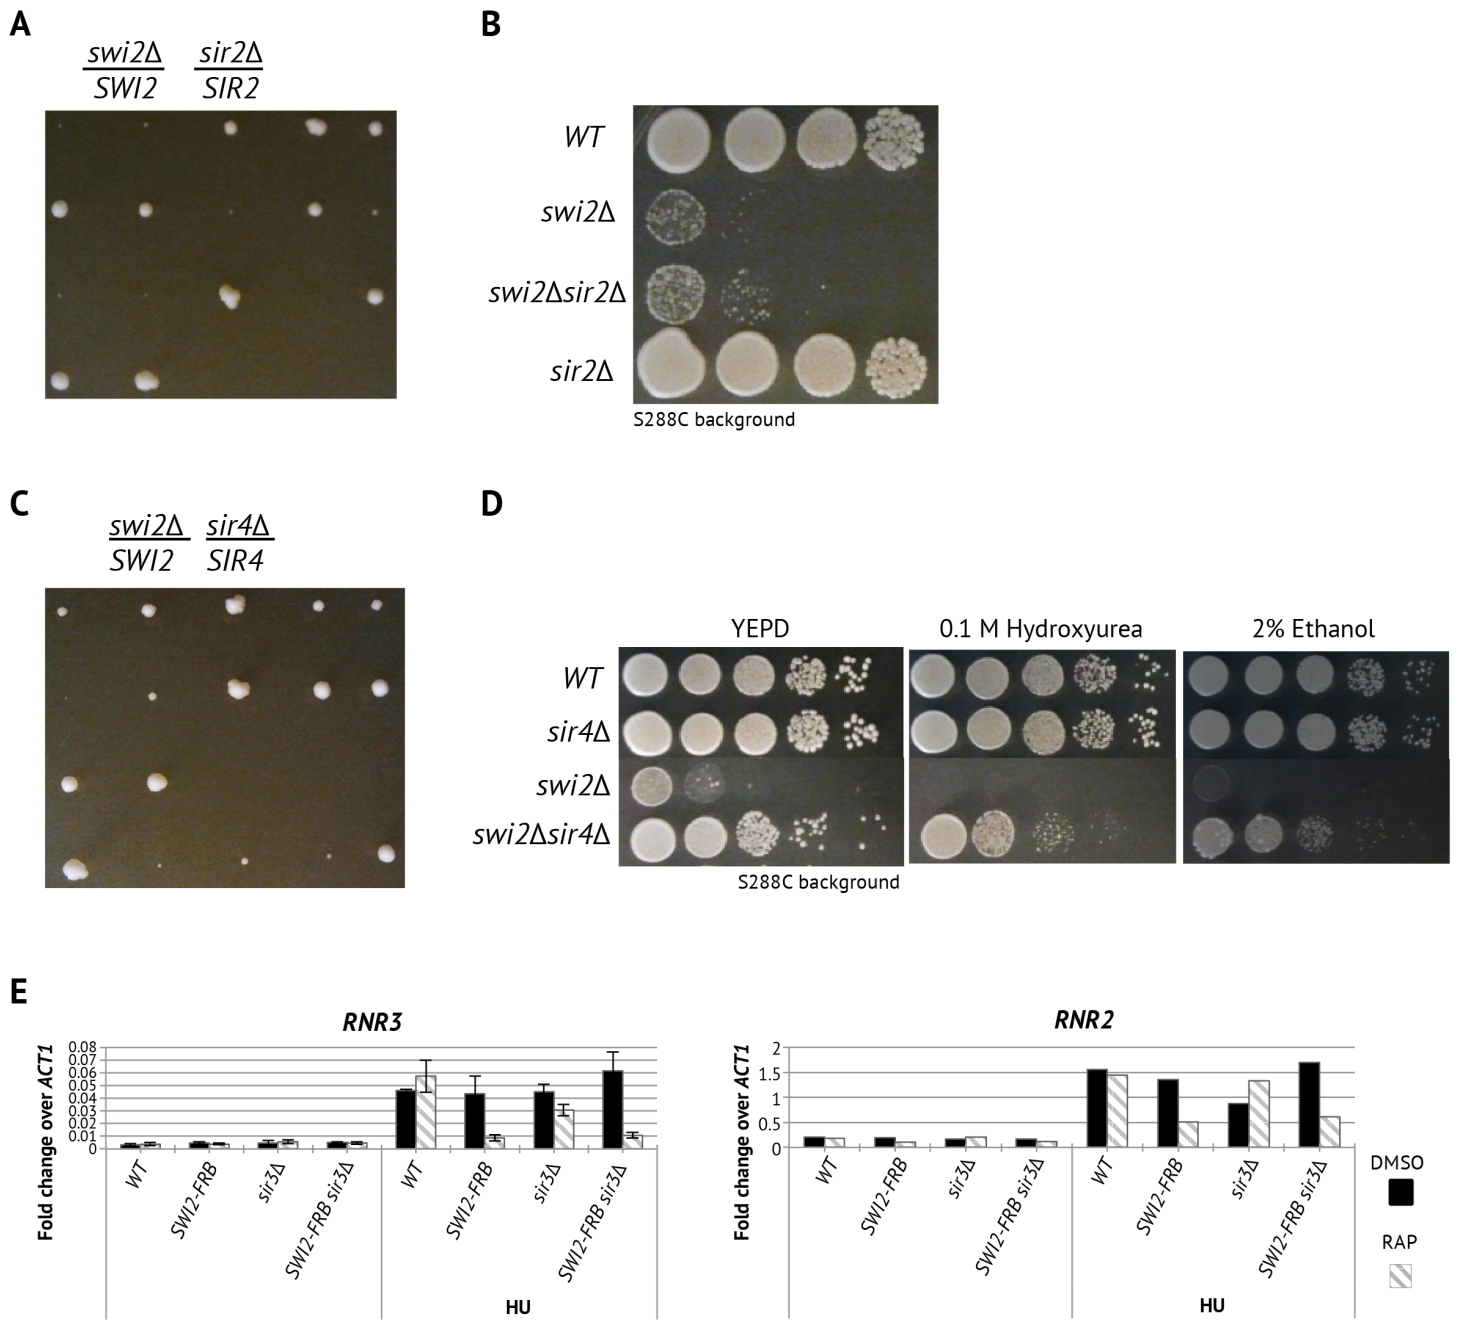

A

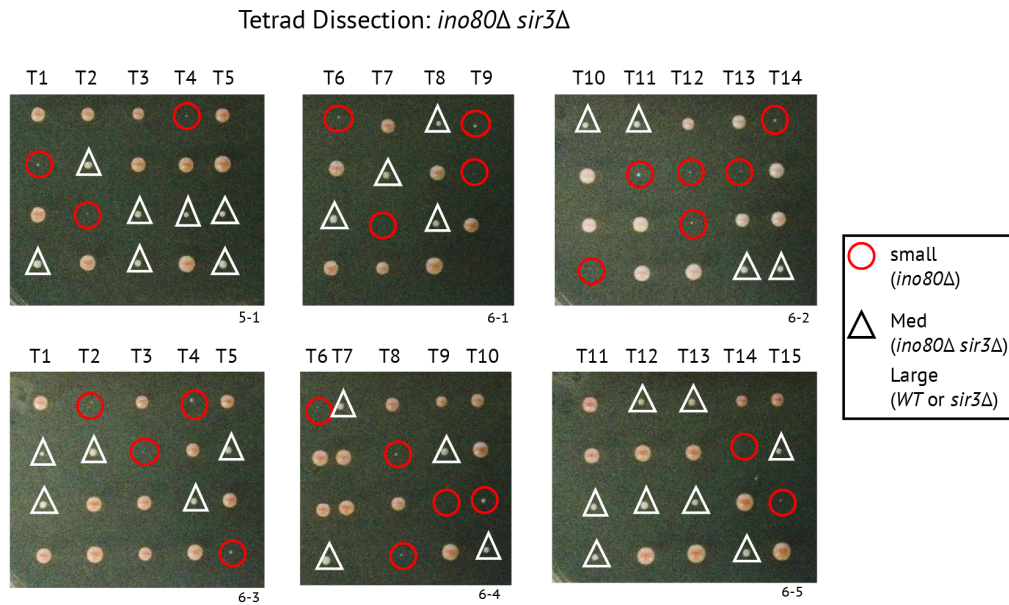

B

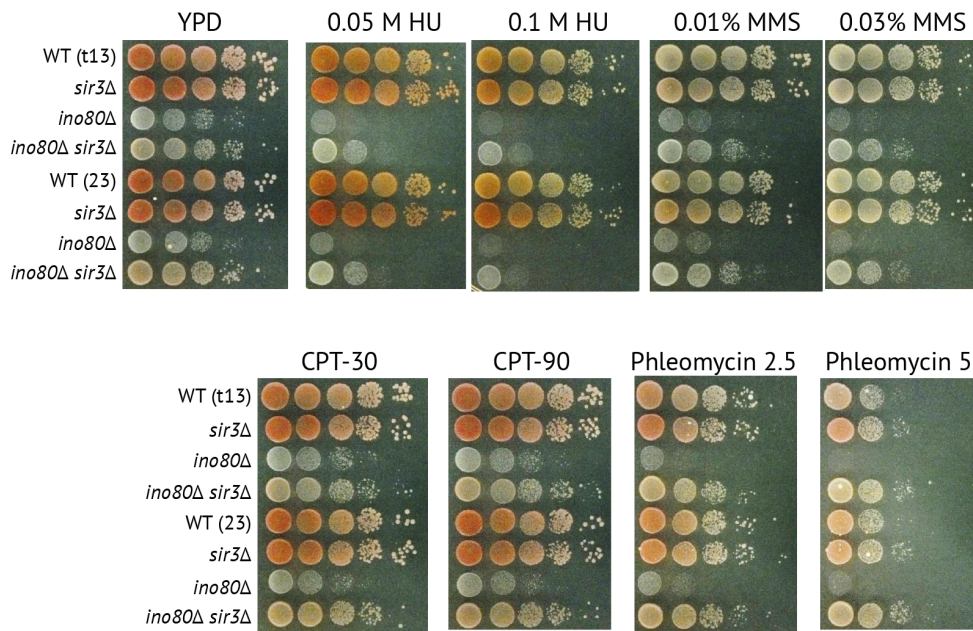

Figure S3

Rege et al

A

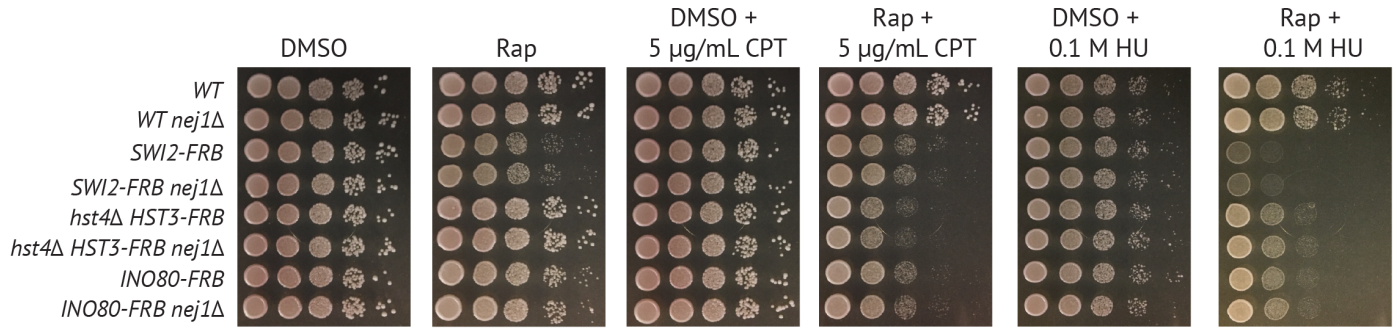

B

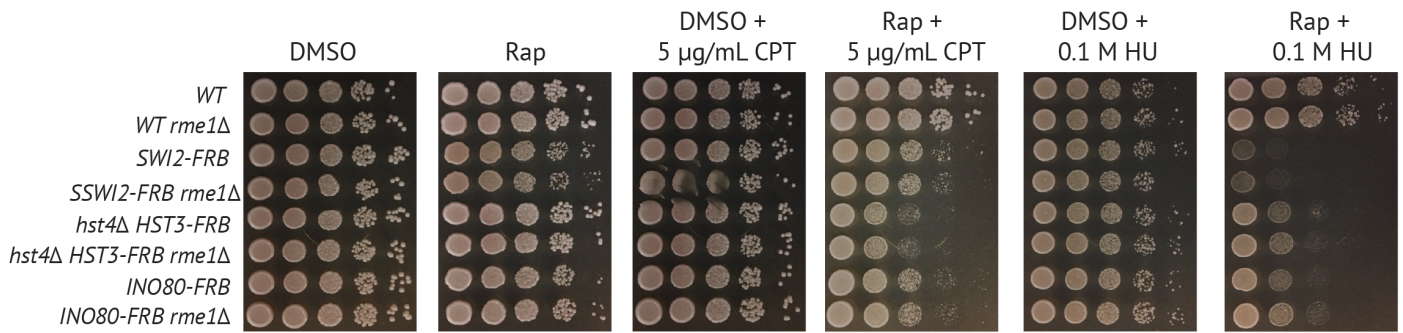

C

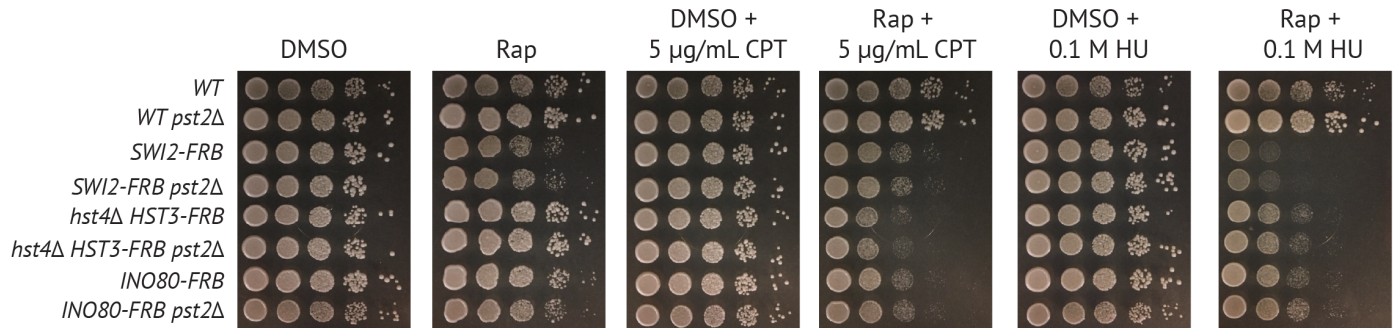

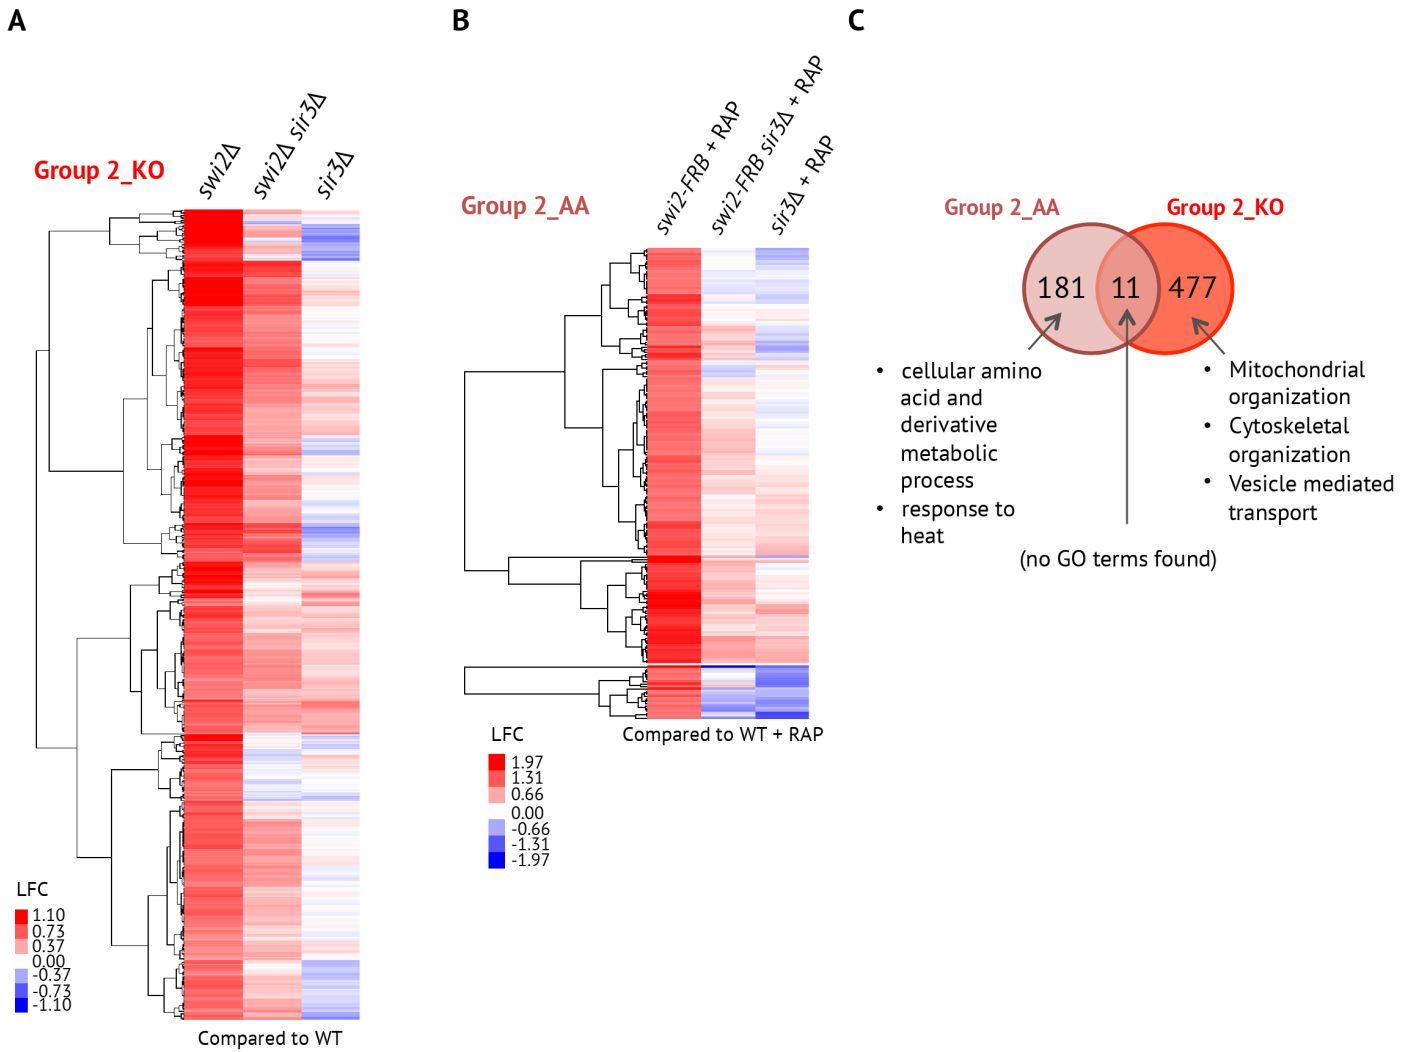

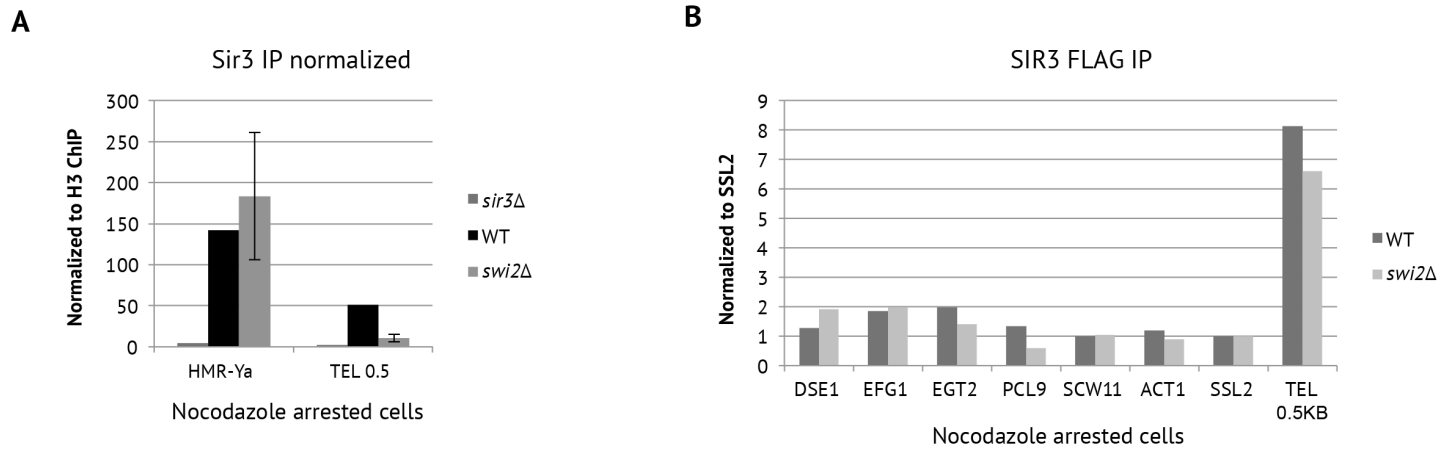



**Table S1. List of Group 1 RO genes**

swi2D = swi2 null mutant; sir3D = sir3 null mutant, WT = Wildtype

| YORF      | NAME    | swi2D-WT  | swi2Dsir3D-WT | sir3D-WT  |
|-----------|---------|-----------|---------------|-----------|
| YOR107W   | YOR107W | -1.736286 | -1.249234     | 0.802684  |
| YOR049C   | YOR049C | -1.799513 | -1.528723     | 1.077021  |
| YOR032C   | YOR032C | -1.190089 | -1.02068      | 1.545266  |
| YJL116C   | YJL116C | -2.189504 | -0.596606     | 2.268662  |
| YIL169C   | YIL169C | -0.686039 | -0.35075      | 2.457973  |
| YIL169C   | YIL169C | -0.866575 | -0.786447     | 2.38699   |
| YOL155C   | YOL155C | -0.771853 | -0.763125     | 2.132386  |
| YLL012W   | YLL012W | -1.095636 | -0.664814     | 0.251892  |
| YMR182W-A | YMR182W | -1.19808  | -0.661026     | 0.069504  |
| YER072W   | YER072W | -1.036205 | -0.931685     | -0.004959 |
| YBR238C   | YBR238C | -1.113228 | -1.032084     | 0.050758  |
| YGR079W   | YGR079W | -1.056979 | -0.935159     | 0.135865  |
| YNL141W   | YNL141W | -1.263049 | -0.889395     | 0.046825  |
| YKL185W   | YKL185W | -0.871451 | -0.845494     | -0.158825 |
| YHR049W   | YHR049W | -0.982429 | -0.822014     | -0.31239  |
| YER062C   | YER062C | -0.938457 | -0.793679     | -0.232057 |
| YOL002C   | YOL002C | -0.883949 | -0.611531     | -0.186142 |
| YOR101W   | YOR101W | -0.89683  | -0.624431     | -0.017271 |
| YLR008C   | YLR008C | -0.812653 | -0.574562     | -0.044313 |
| YFL004W   | YFL004W | -0.986432 | -0.698759     | 0.025827  |
| YBR085W   | YBR085W | -1.020654 | -0.603666     | -0.067401 |
| YDR384C   | YDR384C | -0.95195  | -0.607941     | 0.163866  |
| YJR060W   | YJR060W | -0.792775 | -0.641355     | 0.115003  |
| YPR054W   | YPR054W | -0.786343 | -0.572491     | 0.119735  |
| YLR300W   | YLR300W | -0.593589 | -0.854639     | 0.03546   |
| YER044C   | YER044C | -0.76323  | -0.995545     | 0.009447  |
| YPL092W   | YPL092W | -0.784119 | -0.84839      | 0.077845  |
| YML075C   | YML075C | -0.66478  | -0.742785     | 0.31812   |
| YPL066W   | YPL066W | -0.538909 | -0.641721     | 0.178508  |
| YMR030W-A | YMR030W | -0.616896 | -0.454838     | 0.084452  |
| YJL117W   | YJL117W | -0.600328 | -0.511951     | 0.060395  |
| YMR032W   | YMR032W | -0.641548 | -0.584348     | 0.017399  |
| YER056C   | YER056C | -0.658738 | -0.60332      | -0.057556 |
| YHR022C   | YHR022C | -0.730672 | -0.465317     | 0.488107  |
| YNR009W   | YNR009W | -0.639524 | -0.539942     | 0.276325  |
| YPL068C   | YPL068C | -0.639863 | -0.390321     | 0.311581  |
| YDR044W   | YDR044W | -0.787838 | -0.718158     | 0.576189  |
| YPL057C   | YPL057C | -1.304416 | -0.453506     | -0.09573  |
| YNL327W   | YNL327W | -1.419537 | -0.456658     | -0.035435 |
| YGR272C   | YGR272C | -1.318424 | -0.351872     | -0.051133 |
| YJR048W   | YJR048W | -1.257396 | -0.326339     | 0.014971  |
| YOL019W   | YOL019W | -1.288769 | -0.387384     | 0.11906   |
| YKL099C   | YKL099C | -1.150759 | -0.220279     | 0.07291   |
| YHR066W   | YHR066W | -1.304707 | -0.185313     | 0.03815   |
| YOR095C   | YOR095C | -0.997563 | -0.35532      | 0.050813  |
| YAL059W   | YAL059W | -0.994499 | -0.398791     | 0.0139    |

|           |           |           |           |           |
|-----------|-----------|-----------|-----------|-----------|
| YIL158W   | YIL158W   | -1.038477 | -0.298129 | 0.012811  |
| YMR239C   | YMR239C   | -1.079968 | -0.323804 | 0.015705  |
| YDR184C   | YDR184C   | -1.117233 | -0.405462 | 0.066926  |
| YPL146C   | YPL146C   | -1.097313 | -0.341373 | 0.089128  |
| YLR073C   | YLR073C   | -1.124565 | -0.367879 | -0.154846 |
| YHR052W   | YHR052W   | -1.096203 | -0.388025 | -0.038756 |
| YMR015C   | YMR015C   | -1.192328 | -0.529732 | -0.121981 |
| YEL040W   | YEL040W   | -1.140605 | -0.537784 | -0.084598 |
| YNL024C   | YNL024C   | -1.124738 | -0.668689 | -0.176781 |
| YOR072W-B | YOR072W   | -1.179767 | -0.501843 | -0.313012 |
| YMR011W   | YMR011W   | -1.047188 | -0.494915 | -0.209743 |
| YDL179W   | YDL179W   | -1.4164   | -0.376551 | -0.21954  |
| YGR271C-A | YGR271C-A | -1.367881 | -0.301543 | -0.243718 |
| YER124C   | YER124C   | -1.394713 | -0.365854 | -0.539364 |
| YPL061W   | YPL061W   | -1.293322 | -0.005912 | -0.610692 |
| YBL028C   | YBL028C   | -1.025202 | -0.206871 | -0.053283 |
| YGL028C   | YGL028C   | -0.98148  | -0.264637 | -0.118008 |
| YCR020W-B | YCR020W   | -1.018662 | -0.087625 | -0.049605 |
| YJL011C   | YJL011C   | -0.792154 | -0.010188 | -0.011872 |
| YPL158C   | YPL158C   | -0.814284 | 0.01076   | -0.092527 |
| YHR196W   | YHR196W   | -0.863989 | -0.165838 | -0.124069 |
| YLR287C   | YLR287C   | -0.782722 | -0.099197 | -0.197116 |
| YOL020W   | YOL020W   | -0.739805 | -0.203711 | -0.071481 |
| YOR159C   | YOR159C   | -0.673594 | -0.138845 | -0.077676 |
| YPL227C   | YPL227C   | -0.680673 | -0.181158 | -0.113845 |
| YLR264W   | YLR264W   | -0.649254 | -0.204616 | -0.20628  |
| YPL163C   | YPL163C   | -0.819237 | -0.39144  | -0.165403 |
| YCR043C   | YCR043C   | -0.828681 | -0.340857 | -0.196241 |
| YBL055C   | YBL055C   | -0.690262 | -0.333605 | -0.148308 |
| YKL164C   | YKL164C   | -0.886037 | -0.389714 | -0.091537 |
| YLR285C-A | YLR285C-A | -0.812289 | -0.440132 | -0.07874  |
| YKR061W   | YKR061W   | -0.855789 | -0.461683 | 0.016426  |
| YNL075W   | YNL075W   | -0.873769 | -0.303583 | 0.06103   |
| YOR119C   | YOR119C   | -0.88207  | -0.345121 | 0.01433   |
| YOR004W   | YOR004W   | -0.878897 | -0.356542 | 0.055945  |
| YGR081C   | YGR081C   | -0.886528 | -0.245544 | -0.064313 |
| YDL063C   | YDL063C   | -0.8893   | -0.297907 | -0.073846 |
| YML043C   | YML043C   | -0.904041 | -0.215257 | -0.006759 |
| YNL300W   | YNL300W   | -0.767885 | -0.357339 | 0.057677  |
| YPL165C   | YPL165C   | -0.804397 | -0.320086 | 0.053357  |
| YOL144W   | YOL144W   | -0.742002 | -0.28505  | 0.092757  |
| YML080W   | YML080W   | -0.808155 | -0.343047 | -0.05663  |
| YNL034W   | YNL034W   | -0.798485 | -0.305995 | -0.046402 |
| YNL119W   | YNL119W   | -0.738471 | -0.290834 | -0.06127  |
| YDR399W   | YDR399W   | -0.730769 | -0.433201 | -0.034015 |
| YDL042C   | YDL042C   | -0.852518 | -0.28447  | 0.312551  |
| YJL122W   | YJL122W   | -0.801952 | -0.352235 | 0.287684  |
| YGR041W   | YGR041W   | -0.81707  | -0.416311 | 0.221974  |
| YLR063W   | YLR063W   | -0.785169 | -0.351531 | 0.189522  |

|           |           |           |           |           |
|-----------|-----------|-----------|-----------|-----------|
| YHR169W   | YHR169W   | -0.921531 | -0.935304 | 0.213337  |
| YLR363W-A | YLR363W-  | -0.940268 | -0.214857 | 0.080432  |
| YNL301C   | YNL301C   | -0.952251 | -0.208943 | 0.084877  |
| YDR299W   | YDR299W   | -0.920373 | -0.242432 | 0.116508  |
| YGL029W   | YGL029W   | -0.974169 | -0.244291 | 0.044468  |
| YHR197W   | YHR197W   | -0.983111 | -0.326906 | 0.130451  |
| YLL011W   | YLL011W   | -0.978058 | -0.249897 | 0.129031  |
| YNL182C   | YNL182C   | -1.00086  | -0.256279 | 0.160956  |
| YOR287C   | YOR287C   | -1.026403 | -0.257126 | 0.214451  |
| YOL080C   | YOL080C   | -1.069416 | -0.271948 | 0.147793  |
| YLR068W   | YLR068W   | -0.939414 | -0.062827 | 0.087384  |
| YOR342C   | YOR342C   | -0.809384 | -0.059979 | 0.125933  |
| YCR016W   | YCR016W   | -0.852698 | -0.095476 | 0.052606  |
| YOR264W   | YOR264W   | -0.85863  | 0.023682  | 0.160862  |
| YDR412W   | YDR412W   | -0.840776 | 0.039301  | 0.100001  |
| YPL245W   | YPL245W   | -0.926171 | 0.073276  | 0.256865  |
| YIL019W   | YIL019W   | -0.824764 | 0.091556  | 0.273614  |
| YDR083W   | YDR083W   | -0.915437 | -0.173763 | 0.247534  |
| YHR085W   | YHR085W   | -0.837462 | -0.253564 | 0.215562  |
| YDR324C   | YDR324C   | -0.829401 | -0.198156 | 0.256622  |
| YLR003C   | YLR003C   | -0.766628 | -0.120755 | 0.136361  |
| YGR187C   | YGR187C   | -0.740108 | -0.130188 | 0.16448   |
| YDR361C   | YDR361C   | -0.806214 | -0.157068 | 0.185872  |
| YPR137W   | YPR137W   | -0.771569 | -0.095819 | 0.253034  |
| YIL103W   | YIL103W   | -0.822611 | -0.177048 | -8.72E-04 |
| YJL148W   | YJL148W   | -0.804848 | -0.162139 | 0.02211   |
| YDR449C   | YDR449C   | -0.828149 | -0.23701  | 0.019955  |
| YIL091C   | YIL091C   | -0.829529 | -0.198132 | 0.05289   |
| YER127W   | YER127W   | -0.877939 | -0.199958 | 0.148394  |
| YNL111C   | YNL111C   | -0.809315 | -0.218915 | 0.120586  |
| YKR024C   | YKR024C   | -0.780613 | -0.240749 | 0.136802  |
| YDL043C   | YDL043C   | -0.748002 | -0.186336 | 0.044226  |
| YGR283C   | YGR283C   | -0.78912  | -0.186846 | 0.043388  |
| YLR347C   | YLR347C   | -0.71737  | -0.127022 | 0.065812  |
| YLR222C   | YLR222C   | -0.762311 | -0.144403 | 0.06022   |
| YFL034C-A | YFL034C-A | -0.621965 | -0.448212 | -0.283375 |
| YPR166C   | YPR166C   | -0.652454 | -0.411842 | -0.275068 |
| YPR106W   | YPR106W   | -0.62125  | -0.625154 | -0.222107 |
| YDR210W   | YDR210W   | -0.76796  | -0.353979 | -0.35536  |
| YJL096W   | YJL096W   | -0.585856 | -0.368384 | -0.041313 |
| YNL169C   | YNL169C   | -0.525778 | -0.303254 | -0.144911 |
| YPR108W-A | YPR108W-  | -0.549497 | -0.331522 | -0.176694 |
| YDR070C   | YDR070C   | -0.790551 | -0.667047 | -0.574221 |
| YMR118C   | YMR118C   | -0.573588 | -0.551602 | -0.631359 |
| YML058W-A | YML058W-  | -0.593191 | 0.265816  | -0.440319 |
| YML108W   | YML108W   | -0.495256 | 0.063711  | -0.148922 |
| YKL096W   | YKL096W   | -1.5604   | -0.110821 | 0.363457  |
| YMR230W-A | YMR230W   | -1.686877 | -0.517905 | 0.255474  |
| YKL078W   | YKL078W   | -1.078741 | -0.409123 | 0.246475  |
| YDL241W   | YDL241W   | -1.03905  | -0.521772 | 0.4537    |

|         |         |           |           |          |
|---------|---------|-----------|-----------|----------|
| YLR121C | YPR121C | -1.101156 | -0.093144 | 0.584482 |
| YHR094C | YHR094C | -1.207275 | 0.243913  | 0.274392 |
| YNR067C | YNR067C | -1.430648 | 0.257047  | 0.118234 |
| YDR222W | YDR222W | -1.421418 | 0.408224  | 0.079002 |
| YJR070C | YJR070C | -0.569932 | -0.180888 | 0.142184 |
| YLR409C | YLR409C | -0.618153 | -0.238689 | 0.185317 |
| YLR221C | YLR221C | -0.612013 | -0.171469 | 0.213431 |
| YOR340C | YOR340C | -0.615029 | -0.141354 | 0.225569 |
| YKL166C | YKL166C | -0.69773  | -0.1267   | 0.148319 |
| YJL069C | YJL069C | -0.678246 | -0.180436 | 0.173403 |
| YNL175C | YNL175C | -0.665957 | -0.110683 | 0.207458 |
| YLR099C | YLR099C | -0.403286 | -0.129096 | 0.199719 |
| YDR398W | YDR398W | -0.530144 | -0.079465 | 0.183036 |
| YPL069C | YPL069C | -0.607505 | 0.072517  | 0.178488 |
| YOL007C | YOL007C | -0.626065 | -0.02273  | 0.183157 |
| YOR091W | YOR091W | -0.6291   | -0.014712 | 0.163624 |
| YPR143W | YPR143W | -0.62508  | 0.010663  | 0.175941 |
| YDR087C | YDR087C | -0.654831 | -0.003588 | 0.136556 |
| YIL127C | YIL127C | -0.779948 | -0.014545 | 0.186459 |
| YDR021W | YDR021W | -0.740934 | 0.048523  | 0.200147 |
| YER082C | YER082C | -0.706368 | -0.012994 | 0.202725 |
| YOL010W | YOL010W | -0.638388 | 0.015929  | 0.237123 |
| YDR365C | YDR365C | -0.709428 | 0.021993  | 0.278121 |
| YAL025C | YAL025C | -0.635748 | -0.014059 | 0.325016 |
| YIL104C | YIL104C | -0.628021 | -0.131091 | 0.288274 |
| YBR247C | YBR247C | -0.694492 | -0.127991 | 0.286097 |
| YPL043W | YPL043W | -0.696074 | -0.090589 | 0.270935 |
| YBR267W | YBR267W | -0.668156 | -0.086142 | 0.323763 |
| YBR271W | YBR271W | -0.561659 | -0.021174 | 0.463252 |
| YER028C | YER028C | -0.63341  | 0.196135  | 0.762258 |

bioRxiv preprint doi: <https://doi.org/10.1101/2020.03.24.006205>; this version posted March 25, 2020. The copyright holder for this preprint (which was not certified by peer review) is the author/funder. All rights reserved. No reuse allowed without permission.

1810 = SWI2 Anchor away; 1854= SWI2 Anchor away sir3 null mutant; 1853 = sir3 null in Anchor away background; 1809 = Wildtype Anchor away background. \_R = with Rapamycin

| YORF      | NAME  | 1810_R1-1809_R | 1854_R1-1809_R | 1853_R-1809_R |
|-----------|-------|----------------|----------------|---------------|
| YLR154W-E | null  | -1.555192      | -0.351773      | -1.73793      |
| YHR137W   | ARO9  | -1.964415      | -0.29048       | -1.25603      |
| YDL037C   | BSC1  | -2.301298      | 0.054224       | -1.61956      |
| YFR032C   | RRT5  | -2.357541      | -1.169374      | -1.62064      |
| YDR380W   | ARO10 | -2.408232      | -1.078401      | -1.12321      |
| YDR384C   | ATO3  | -2.591182      | -1.606145      | -1.25726      |
| YJL012C   | VTC4  | -1.730655      | -1.150325      | -0.70305      |
| YPL279C   | FEX2  | -1.909143      | -0.916844      | -0.62966      |
| YOR390W   | FEX1  | -1.718305      | -0.730397      | -0.87149      |
| YMR189W   | GCV2  | -1.884147      | -0.76806       | -0.89462      |
| YJL047C-A | null  | -1.877745      | -0.735646      | -1.1494       |
| YNR044W   | AGA1  | -1.889627      | -0.851457      | -1.22788      |
| YNL197C   | WHI3  | -2.013228      | -0.787274      | -1.16914      |
| YLR342W-A | null  | -2.13461       | -1.120897      | -0.62122      |
| YGR041W   | BUD9  | -2.429062      | -1.035065      | -0.73259      |
| YKL043W   | PHD1  | -2.449638      | -1.059257      | -0.481        |
| YJR147W   | HMS2  | -2.521508      | -0.68129       | -0.66571      |
| YKR050W   | TRK2  | -1.564904      | -0.905273      | -0.28193      |
| YOR034C   | AKR2  | -1.47363       | -0.878702      | -0.31952      |
| YLL066W-B | null  | -1.63241       | -0.823486      | -0.21775      |
| YGR233C   | PHO81 | -1.485611      | -0.980128      | -0.03703      |
| YDL042C   | SIR2  | -1.420121      | -0.998536      | -0.09364      |
| YKR104W   | null  | -1.229861      | -0.567416      | 0.079281      |
| YOR066W   | MSA1  | -1.373663      | -0.658872      | -0.06609      |
| YFL021W   | GAT1  | -1.39381       | -0.739817      | 0.070213      |
| YOL020W   | TAT2  | -1.611607      | -0.635395      | -0.02211      |
| YLR285C-A | null  | -1.578821      | -0.490248      | 0.013808      |
| YBR296C   | PHO89 | -1.466358      | -0.626254      | 0.239036      |
| YGR143W   | SKN1  | -1.472033      | -0.868274      | 0.301284      |
| YBR196C-A | null  | -1.686044      | -1.024496      | 0.365435      |
| YGR068C   | ART5  | -1.308685      | -1.367768      | -0.25619      |
| YPR009W   | SUT2  | -1.199259      | -1.578666      | -0.1354       |
| YPL066W   | RGL1  | -1.00754       | -1.297962      | -0.02652      |
| YLR278C   | null  | -1.039162      | -1.355646      | 0.097341      |
| YBR291C   | CTP1  | -1.350511      | -1.317544      | 0.568544      |
| YBL042C   | FUI1  | -1.223819      | -0.91923       | 0.308592      |
| YOR342C   | null  | -1.000736      | -1.138968      | 0.459689      |
| YPR106W   | ISR1  | -1.79978       | -0.483187      | -0.2268       |
| YOR084W   | LPX1  | -1.799683      | -0.689908      | -0.43065      |
| YOR137C   | SIA1  | -1.75522       | -0.752846      | -0.40568      |
| YIR019C   | FLO11 | -1.986636      | -0.540304      | -0.32771      |
| YMR266W   | RSN1  | -2.049499      | -0.570817      | -0.53056      |
| YDR072C   | IPT1  | -1.593271      | 0.019658       | -0.28354      |
| YNR067C   | DSE4  | -1.660394      | -0.136176      | -0.36397      |
| YGL028C   | SCW11 | -1.830712      | -0.060328      | -0.32761      |

|           |        |           |           |          |
|-----------|--------|-----------|-----------|----------|
| YLR139C   | SPS1   | 2.085937  | 0.41215   | 0.129681 |
| YOR383C   | FIT3   | -1.95521  | -0.253077 | 0.131117 |
| YMR011W   | HXT2   | -1.933943 | -0.067735 | 0.024425 |
| YGR249W   | MGA1   | -1.655524 | -0.177218 | 0.18255  |
| YDR038C   | ENA5   | -1.198654 | -0.029782 | -0.27106 |
| YMR155W   | null   | -1.220131 | -0.173316 | -0.18325 |
| YNL327W   | EGT2   | -1.412944 | -0.034828 | -0.17192 |
| YDL195W   | SEC31  | -1.348284 | -0.172596 | -0.38395 |
| YOL105C   | WSC3   | -1.292077 | -0.338939 | -0.38492 |
| YAL021C   | CCR4   | -1.257148 | -0.375177 | -0.42389 |
| YGL063W   | PUS2   | -1.154045 | -0.379087 | -0.23419 |
| YOR081C   | TGL5   | -1.149228 | -0.377802 | -0.29463 |
| YHR151C   | MTC6   | -1.186217 | -0.269886 | -0.29443 |
| YCRO48W   | ARE1   | -1.105687 | -0.121713 | -0.47338 |
| YOR098C   | NUP1   | -1.068292 | -0.063428 | -0.44489 |
| YOR149C   | SMP3   | -1.034922 | -0.057169 | -0.43783 |
| YER154W   | OXA1   | -1.039944 | -0.252443 | -0.41311 |
| YHR143W   | DSE2   | -1.102243 | -0.245431 | -0.38771 |
| YEL017W   | GTT3   | -1.29664  | -0.207355 | -0.66235 |
| YOL158C   | ENB1   | -1.43844  | -0.320369 | -0.77348 |
| YOR068C   | VAM10  | -1.052164 | -0.447297 | -0.52555 |
| YNL251C   | NRD1   | -1.223235 | -0.360766 | -0.62714 |
| YBL004W   | UTP20  | -1.193647 | -0.431908 | -0.60151 |
| YJL062W   | LAS21  | -1.224755 | -0.486421 | -0.66804 |
| YOR160W   | MTR10  | -1.199381 | -0.529148 | -0.52078 |
| YCRO84C   | TUP1   | -1.191201 | -0.64103  | -0.54665 |
| YHR042W   | NCP1   | -1.132657 | -0.631171 | -0.55374 |
| YNL275W   | BOR1   | -1.148786 | -0.62428  | -0.55425 |
| YJL198W   | PHO90  | -1.249746 | -0.669753 | -0.43839 |
| YBL081W   | null   | -1.382356 | -0.512508 | -0.48926 |
| YPL056C   | LCL1   | -1.305682 | -0.50234  | -0.49005 |
| YLR397C   | AFG2   | -1.246947 | -0.564002 | -0.18438 |
| YPL041C   | null   | -1.197879 | -0.597596 | -0.27577 |
| YBR239C   | ERT1   | -1.151174 | -0.694096 | -0.13321 |
| YMR310C   | null   | -1.088656 | -0.7018   | -0.10469 |
| YNL278W   | CAF120 | -1.041454 | -0.441577 | -0.07463 |
| YKR053C   | YSR3   | -1.066398 | -0.578892 | -0.05501 |
| YAL037W   | null   | -1.007443 | -0.678412 | 0.04718  |
| YAR029W   | null   | -1.053898 | -0.631209 | 0.287797 |
| YGL162W   | SUT1   | -1.301283 | -0.314407 | -0.06362 |
| YOR359W   | VTS1   | -1.213828 | -0.250429 | -0.0447  |
| YOR161C   | PNS1   | -1.238826 | -0.276779 | -0.09367 |
| YPL076W   | GPI2   | -1.312037 | -0.184898 | 0.136374 |
| YCL005W   | LDB16  | -1.081465 | -0.277874 | 0.020287 |
| YJL216C   | IMA5   | -1.05942  | -0.269345 | 0.081337 |
| YNL034W   | null   | -1.018354 | -0.190546 | -0.12339 |
| YMR013C   | SEC59  | -1.08777  | -0.242867 | -0.1055  |
| YNL288W   | CAF40  | -1.095138 | -0.264427 | -0.15225 |
| YBL101W-B | null   | -1.014151 | -0.995121 | -0.19002 |
| YBR301W   | PAU24  | -1.260484 | -0.925733 | -0.24493 |

|           |        |           |           |          |
|-----------|--------|-----------|-----------|----------|
| YJL193W   | null   | -1.368008 | -0.862954 | -0.3361  |
| YDR143C   | SAN1   | -1.293169 | -0.8678   | -0.39477 |
| YPR054W   | SMK1   | -1.248613 | -1.072935 | -0.34598 |
| YNL291C   | MID1   | -1.077109 | -0.769886 | -0.70305 |
| YDR538W   | PAD1   | -1.040836 | -0.710045 | -0.72063 |
| YLR459W   | GAB1   | -1.0176   | -0.644804 | -0.73487 |
| YDR404C   | RPB7   | -1.108425 | -0.793386 | -0.61565 |
| YHR163W   | SOL3   | -1.082184 | -0.831005 | -0.57453 |
| YOL052C   | SPE2   | -1.04761  | -0.873968 | -0.6079  |
| YPR121W   | THI22  | -1.021577 | -0.693926 | -0.36949 |
| YHR086W-A | null   | -1.059386 | -0.784566 | -0.40747 |
| YNR055C   | HOL1   | -1.113354 | -0.745037 | -0.50927 |
| YOR321W   | PMT3   | -1.080195 | -0.7333   | -0.57796 |
| YKL078W   | DHR2   | -1.047444 | -0.702301 | -0.58379 |
| YPL162C   | null   | -1.091111 | -0.657734 | -0.54618 |
| YBR086C   | IST2   | -1.022796 | -0.622193 | -0.57988 |
| YMR274C   | RCE1   | -1.413554 | -0.919902 | -0.55519 |
| YCR065W   | HCM1   | -1.285848 | -0.962969 | -0.67737 |
| YEL065W   | SIT1   | -1.326927 | -0.783409 | -0.60061 |
| YHR086W   | NAM8   | -1.318066 | -0.818393 | -0.61668 |
| YGR281W   | YOR1   | -1.281143 | -0.81167  | -0.52579 |
| YDL179W   | PCL9   | -1.268798 | -0.745332 | -0.50394 |
| YLR141W   | RRN5   | -1.303257 | -0.781836 | -0.77922 |
| YGR038W   | ORM1   | -1.246203 | -0.704735 | -0.74587 |
| YLL031C   | GPI13  | -1.30253  | -0.643208 | -0.68088 |
| YBR175W   | SWD3   | -1.260419 | -1.254828 | -0.86015 |
| YER110C   | KAP123 | -1.067729 | -1.093829 | -0.8948  |
| YGR131W   | FHN1   | -1.038851 | -1.171217 | -0.9338  |
| YBR074W   | PFF1   | -1.063322 | -1.206995 | -0.77965 |
| YMR277W   | FCP1   | -1.041506 | -0.97864  | -0.84932 |
| YPR052C   | NHP6A  | -1.022073 | -0.965162 | -0.68902 |
| YLR380W   | CSR1   | -1.085019 | -0.869708 | -0.74981 |
| YNL238W   | KEX2   | -1.107759 | -0.93974  | -0.74767 |
| YPR128C   | ANT1   | -1.14267  | -0.956547 | -0.6306  |
| YPL018W   | CTF19  | -1.096172 | -0.982328 | -0.61275 |
| YCL002C   | null   | -1.095239 | -1.116041 | -0.62248 |
| YOR129C   | AFI1   | -1.366272 | -1.293772 | -0.5899  |
| YNL080C   | EOS1   | -1.293655 | -1.163043 | -0.53001 |
| YOR378W   | AMF1   | -1.008824 | -0.401119 | -1.10451 |
| YGR146C-A | null   | -1.037179 | -0.253796 | -1.17931 |
| YBL112C   | null   | -1.087553 | -0.294808 | -0.86761 |
| YEL007W   | MIT1   | -1.450384 | -0.175074 | -1.11328 |
| YBL032W   | HEK2   | -1.428298 | -0.549564 | -1.20662 |
| YMR055C   | BUB2   | -1.32715  | -0.832963 | -0.8408  |
| YDL093W   | PMT5   | -1.285507 | -0.896378 | -0.84831 |
| YLR381W   | CTF3   | -1.309061 | -0.870505 | -0.88433 |
| YNR060W   | FRE4   | -1.404624 | -0.994241 | -0.99664 |
| YJR124C   | null   | -1.421199 | -0.870187 | -0.82313 |
| YPL128C   | TBF1   | -1.46835  | -0.971687 | -0.79808 |

|           |       |           |           |          |
|-----------|-------|-----------|-----------|----------|
| YDL160C   | DHH1  | -1.460546 | -0.712223 | -0.80449 |
| YDR044W   | HEM13 | -1.482312 | -0.685862 | -0.96316 |
| YDR414C   | ERD1  | -1.115155 | -0.567869 | -1.01918 |
| YOR307C   | SLY41 | -1.176199 | -0.6677   | -0.94427 |
| YEL042W   | GDA1  | -1.208786 | -0.640769 | -1.01143 |
| YNL283C   | WSC2  | -1.176128 | -0.87668  | -0.95097 |
| YOR067C   | ALG8  | -1.246612 | -0.771258 | -1.00481 |
| YHR115C   | DMA1  | -1.122361 | -0.725427 | -0.90375 |
| YDL048C   | STP4  | -1.213949 | 1.304484  | 1.386136 |
| YCL068C   | null  | -1.523301 | 1.657408  | 1.603099 |
| YFR022W   | ROG3  | -1.101124 | 1.820295  | 2.165995 |
| YCR108C   | null  | -1.06561  | 1.33408   | 2.05838  |
| YPL165C   | SET6  | -2.289622 | 1.097893  | 2.20319  |
| YMR182C   | RGM1  | -1.899901 | 1.352962  | 1.640581 |
| YDR247W   | VHS1  | -1.800171 | 1.391117  | 1.98415  |
| YPL014W   | null  | -1.910601 | 1.698177  | 2.742215 |
| YER028C   | MIG3  | -1.415682 | 1.989151  | 0.358269 |
| YOL011W   | PLB3  | -1.942625 | 0.632071  | 1.215531 |
| YER188C-A | null  | -2.006381 | 0.225677  | 0.750596 |
| YER088C   | DOT6  | -1.230253 | 0.578579  | 0.870996 |
| YLR120C   | YPS1  | -1.208372 | 0.519998  | 0.838073 |
| YBR298C   | MAL31 | -1.420194 | 0.582458  | 0.997994 |
| YKL220C   | FRE2  | -1.163377 | 0.038322  | 0.585177 |
| YOL136C   | PFK27 | -1.330024 | 0.122457  | 0.50754  |
| YBL111C   | null  | -1.481711 | 0.309395  | 0.461409 |
| YHL040C   | ARN1  | -1.378605 | 0.368258  | 0.793778 |
| YEL063C   | CAN1  | -1.266327 | 0.260261  | 0.646736 |
| YOR273C   | TPO4  | -1.594325 | 0.143492  | 0.763655 |
| YDR534C   | FIT1  | -1.637009 | 0.208779  | 0.328522 |
| YOR381W   | FRE3  | -1.59899  | 0.290977  | 0.265652 |
| YCR089W   | FIG2  | -1.756856 | 0.166196  | 0.177603 |
| YPL057C   | SUR1  | -1.782771 | 0.123331  | 0.541527 |
| YAL040C   | CLN3  | -1.861156 | 0.015472  | 0.404578 |
| YLR152C   | null  | -1.285577 | -0.35867  | 0.317725 |
| YAL060W   | BDH1  | -1.328006 | -0.452297 | 0.269904 |
| YBR021W   | FUR4  | -1.114172 | -0.330952 | 0.547602 |
| YKL029C   | MAE1  | -1.253982 | -0.332381 | 0.555527 |
| YMR272C   | SCS7  | -1.212712 | -0.223203 | 0.405308 |
| YOL059W   | GPD2  | -1.007211 | -0.056624 | 0.831813 |
| YGL256W   | ADH4  | -1.093417 | -0.305503 | 0.710373 |
| YLL066W-B | null  | -1.952956 | -0.33443  | 0.509491 |
| YAR010C   | null  | -1.799371 | -0.406109 | 0.645434 |
| YHL016C   | DUR3  | -1.741483 | -0.492125 | 0.35648  |
| YBR196C-B | null  | -1.369806 | -0.58939  | 0.657573 |
| YCL025C   | AGP1  | -1.682185 | -0.331049 | 0.823672 |
| YDR205W   | MSC2  | -1.001279 | 0.140402  | -0.1044  |
| YIL006W   | YIA6  | -1.039886 | 0.124122  | -0.01684 |
| YLR337C   | VRP1  | -1.096899 | 0.188038  | -0.00914 |
| YNL321W   | VNX1  | -1.180766 | 0.100233  | -0.12292 |



|           |       |           |           |          |
|-----------|-------|-----------|-----------|----------|
| YMR120C   | ADE17 | -1.211862 | 0.026671  | 0.08318  |
| YPL190C   | NAB3  | -1.246992 | 0.338697  | -0.18057 |
| YOR140W   | SFL1  | -1.290206 | 0.326112  | -0.15347 |
| YMR069W   | NAT4  | -1.221564 | 0.089779  | 0.273154 |
| YKR102W   | FLO10 | -1.275704 | 0.194769  | 0.316539 |
| YDR232W   | HEM1  | -1.332911 | 0.045818  | 0.348183 |
| YDR246W-A | null  | -1.440417 | 0.158604  | 0.091489 |
| YDL140C   | RPO21 | -1.31474  | 0.154825  | 0.066087 |
| YBR020W   | GAL1  | -1.311369 | 0.086624  | 0.107964 |
| YOR349W   | CIN1  | -1.048967 | -0.045259 | 0.035903 |
| YAL020C   | ATS1  | -1.068134 | -0.002847 | 0.125437 |
| YGR079W   | null  | -1.15463  | -0.053631 | 0.260586 |
| YER152C   | null  | -1.022108 | -0.125026 | 0.246497 |
| YAL063C   | FLO9  | -1.067861 | -0.071818 | 0.206601 |
| YKL187C   | FAT3  | -1.036015 | 0.178003  | 0.196359 |
| YLR116W   | MSL5  | -1.06763  | 0.179945  | 0.243781 |
| YKL198C   | PTK1  | -1.096863 | 0.259249  | 0.20616  |
| YDR160W   | SSY1  | -1.019812 | 0.148067  | 0.308233 |
| YER060W   | FCY21 | -1.029224 | 0.203936  | 0.351275 |
| YGL178W   | MPT5  | -1.179571 | 0.479767  | 0.359187 |
| YDR438W   | THI74 | -1.258853 | 0.579677  | 0.370009 |
| YLR099C   | ICT1  | -1.13923  | 0.600478  | 0.329931 |
| YLR403W   | SFP1  | -1.212804 | 0.429344  | 0.237323 |
| YJL094C   | KHA1  | -1.017959 | 0.514731  | 0.080093 |
| YMR008C   | PLB1  | -1.103382 | 0.676622  | 0.553909 |
| YGR289C   | MAL11 | -1.084481 | 0.696059  | 0.692787 |
| YPL015C   | HST2  | -1.078514 | 1.148372  | 0.591381 |
| YHR094C   | HXT1  | -1.578098 | 0.964523  | 0.494114 |
| YGR023W   | MTL1  | -1.551499 | 0.762923  | 0.690967 |
| YMR291W   | TDA1  | -1.2614   | 0.269249  | 1.804324 |
| YGR032W   | GSC2  | -1.242827 | 0.236364  | 1.776908 |
| YJL079C   | PRY1  | -1.443107 | 0.230725  | 1.836415 |
| YBR067C   | TIP1  | -1.191979 | 0.6789    | 2.078076 |
| YHL026C   | null  | -1.244398 | 0.708651  | 1.464342 |
| YGR121C   | MEP1  | -1.02356  | 0.688905  | 1.588961 |
| YER053C   | PIC2  | -1.617607 | 0.204335  | 1.427363 |
| YJL212C   | OPT1  | -1.53264  | 0.103232  | 1.427167 |
| YER158C   | null  | -1.423766 | 0.170882  | 1.213202 |
| YPL036W   | PMA2  | -1.151877 | -0.145902 | 1.544101 |
| YLR142W   | PUT1  | -1.002157 | 0.184707  | 1.238826 |
| YOR071C   | NRT1  | -1.17284  | -0.074057 | 1.26817  |
| YGR260W   | TNA1  | -1.147552 | 0.084828  | 1.242491 |
| YFL014W   | HSP12 | -1.292276 | 0.237658  | 2.488439 |
| YPL092W   | SSU1  | -1.065039 | -0.681846 | 0.960938 |
| YBL005W-A | null  | -1.17081  | -0.719291 | 0.961157 |
| YNL024C   | null  | -1.26106  | -0.90903  | 1.338866 |
| YNR014W   | null  | -1.922514 | -0.605679 | 1.777716 |
| YPR160W   | GPH1  | -1.099576 | -0.583531 | 2.009052 |
| YOL104C   | NDJ1  | -1.647413 | -1.534572 | 1.433746 |
| YDR222W   | null  | -2.011217 | -1.458479 | 0.856427 |

|           |       |           |           |          |
|-----------|-------|-----------|-----------|----------|
| YCR018C   | SRD1  | -1.858414 | -2.480437 | 1.389827 |
| YHR033W   | null  | -1.916852 | -1.503132 | 2.110011 |
| YOL052C-A | DDR2  | -1.365443 | -0.876442 | 3.35148  |
| YMR081C   | ISF1  | -1.715576 | -1.687342 | 3.543186 |
| YHR092C   | HXT4  | -3.350206 | 0.671244  | 0.82595  |
| YDL039C   | PRM7  | -2.859618 | 0.584578  | 0.03101  |
| YDL038C   | null  | -3.677256 | 0.345895  | -0.19471 |
| YBR238C   | null  | -2.643991 | -0.768649 | -0.05108 |
| YLR466C-B | null  | -2.556635 | -0.702605 | 0.286957 |
| YOR394C-A | null  | -2.463799 | -0.091134 | 0.527107 |
| YLR466C-B | null  | -2.4757   | -0.355529 | 0.395135 |
| YLL066W-B | null  | -2.254415 | -0.214519 | 0.728592 |
| YJL078C   | PRY3  | -2.463906 | 0.045136  | 0.17965  |
| YDR342C   | HXT7  | -2.174849 | -0.87236  | 1.142651 |
| YER067W   | RGI1  | -2.320877 | -1.049696 | 1.041793 |
| YOR092W   | ECM3  | -2.179419 | -0.617264 | 0.945413 |
| YLR121C   | YPS3  | -2.161079 | -0.657103 | 0.534248 |
| YCR097W   | HMRA1 | -5.067512 | -0.8165   | 0.728803 |

**Table S3. List of Group 1 genes common in the KO and AA datasets**

swi2D = swi2 null mutant; swi2Dsir3D= swi2 and sir3 null mutant, sir3D = sir3 null mutant, WT = Wildtype, 1810 = SWI2 Anchor away; 1854= SWI2 Anchor away sir3 null mutant; 1853 = sir3 null in Anchor away background; 1809 = Wildtype Anchor away background. \_R = with Rapamycin

| YORF    | NAME    | swi2Dsir3D- |           | sir3D-WT  | 1810_R1-  |                |               |
|---------|---------|-------------|-----------|-----------|-----------|----------------|---------------|
|         |         | swi2D-WT    | WT        |           | 1809_R    | 1854_R1-1809_R | 1853_R-1809_R |
| YBR238C | YBR238C | -1.113228   | -1.032084 | 0.050758  | -2.643991 | -0.768649      | -0.051082     |
| YER028C | MIG3    | -0.63341    | 0.196135  | 0.762258  | -1.415682 | 1.989151       | 0.358269      |
| YHR094C | HXT1    | -1.207275   | 0.243913  | 0.274392  | -1.578098 | 0.964523       | 0.494114      |
| YKL078W | DHR2    | -1.078741   | -0.409123 | 0.246475  | -1.047444 | -0.702301      | -0.583786     |
| YDL042C | SIR2    | -0.852518   | -0.28447  | 0.312551  | -1.420121 | -0.998536      | -0.093641     |
| YDL179W | PCL9    | -1.4164     | -0.376551 | -0.21954  | -1.268798 | -0.745332      | -0.503944     |
| YDR044W | HEM13   | -0.787838   | -0.718158 | 0.576189  | -1.482312 | -0.685862      | -0.96316      |
| YDR222W | YDR222  | -1.421418   | 0.408224  | 0.079002  | -2.011217 | -1.458479      | 0.856427      |
| YDR384C | ATO3    | -0.95195    | -0.607941 | 0.163866  | -2.591182 | -1.606145      | -1.25726      |
| YGL028C | SCW11   | -0.98148    | -0.264637 | -0.118008 | -1.830712 | -0.060328      | -0.327612     |
| YGR041W | BUD9    | -0.81707    | -0.416311 | 0.221974  | -2.429062 | -1.035065      | -0.732587     |
| YGR079W | YGR079  | -1.056979   | -0.935159 | 0.135865  | -1.15463  | -0.053631      | 0.260586      |
| YLR099C | ICT1    | -0.403286   | -0.129096 | 0.199719  | -1.13923  | 0.600478       | 0.329931      |
| YLR121C | YPS3    | -1.101156   | -0.093144 | 0.564482  | -2.161079 | -0.657103      | 0.534248      |
| YMR011W | HXT2    | -1.047188   | -0.494915 | -0.209743 | -1.933943 | -0.067735      | 0.024425      |
| YNL024C | EFM6    | -1.124738   | -0.668689 | -0.176781 | -1.26106  | -0.90903       | 1.338866      |
| YNL034W | YNL034  | -0.798485   | -0.305995 | -0.046402 | -1.018354 | -0.190546      | -0.123394     |
| YNL327W | EGT2    | -1.419537   | -0.456658 | -0.035435 | -1.412944 | -0.034828      | -0.171923     |
| YNR067C | DSE4    | -1.430648   | 0.257047  | 0.118234  | -1.660394 | -0.136176      | -0.363971     |
| YOL020W | TAT2    | -0.739805   | -0.203711 | -0.071481 | -1.611607 | -0.635395      | -0.022112     |
| YOR342C | YOR342  | -0.809384   | -0.059979 | 0.125933  | -1.000736 | -1.138968      | 0.459689      |
| YPL057C | SUR1    | -1.304416   | -0.453506 | -0.09573  | -1.782771 | 0.123331       | 0.541527      |
| YPL066W | RGL1    | -0.538909   | -0.641721 | 0.178508  | -1.00754  | -1.297962      | -0.026519     |
| YPL092W | SSU1    | -0.784119   | -0.84839  | 0.077845  | -1.065039 | -0.681846      | 0.960938      |
| YPL165C | SET6    | -0.804397   | -0.320086 | 0.053357  | -2.289622 | 1.097893       | 2.20319       |
| YPR054W | SMK1    | -0.786343   | -0.572491 | 0.119735  | -1.248613 | -1.072935      | -0.345981     |
| YPR106W | ISR1    | -0.62125    | -0.625154 | -0.222107 | -1.79978  | -0.483187      | -0.226804     |
| YLR285C | YLR285C | -0.812289   | -0.440132 | -0.07874  | -1.578821 | -0.490248      | 0.013808      |

**Table S4. List of Group 2 RO genes**

swi2D = swi2 null mutant; sir3D = sir3 null mutant, WT = Wildtype

| YORF      | NAME      | swi2D-WT | swi2Dsir3D-WT | sir3D-WT  |
|-----------|-----------|----------|---------------|-----------|
| YHL012W   | YHL012W   | 1.39651  | 0.363307      | -0.024821 |
| YDL170W   | YDL170W   | 1.434712 | 0.331249      | 0.178301  |
| YLL060C   | YLL060C   | 1.345331 | 0.409135      | 0.188886  |
| YOL119C   | YOL119C   | 1.472612 | 0.061144      | -0.026633 |
| YJR130C   | YJR130C   | 1.328341 | 0.18232       | 0.025941  |
| YAL028W   | YAL028W   | 1.252044 | 0.133739      | -0.110437 |
| YER175C   | YER175C   | 1.426577 | -0.142406     | 0.086255  |
| YNL270C   | YNL270C   | 1.526947 | -0.30727      | -0.022384 |
| YBR145W   | YBR145W   | 1.176709 | -0.413801     | 0.091954  |
| YOR289W   | YOR289W   | 1.303741 | 0.188904      | -0.363791 |
| YJL089W   | YJL089W   | 1.392584 | 0.290784      | -0.29782  |
| YIL037C   | YIL037C   | 1.46089  | 0.263056      | -0.534638 |
| YNL194C   | YNL194C   | 1.510503 | 0.334908      | -0.37898  |
| YCL040W   | YCL040W   | 1.474825 | 0.407789      | -0.438249 |
| YKR076W   | YKR076W   | 1.346451 | 0.424563      | -0.370127 |
| YDR516C   | YDR516C   | 1.157875 | 0.424397      | -0.411819 |
| YHL044W   | YHL044W   | 1.284105 | 0.442617      | -0.568168 |
| YDR309C   | YDR309C   | 1.169489 | 0.019513      | -0.596586 |
| YGL032C   | YGL032C   | 1.138942 | -0.080326     | -0.509035 |
| YDL085W   | YDL085W   | 1.278246 | -0.204536     | -0.537333 |
| YJL103C   | YJL103C   | 1.095172 | 0.228025      | -0.301721 |
| YMR306W   | YMR306W   | 1.062371 | 0.272699      | -0.358249 |
| YOL083W   | YOL083W   | 1.006853 | 0.361934      | -0.320293 |
| YLR270W   | YLR270W   | 0.941675 | 0.318399      | -0.313685 |
| YAR023C   | YAR023C   | 0.861997 | 0.295574      | -0.298766 |
| YKL142W   | YKL142W   | 0.833649 | 0.292383      | -0.429116 |
| YGL104C   | YGL104C   | 0.867143 | 0.316828      | -0.374073 |
| YAR068W   | YAR068W   | 0.80976  | -0.118429     | -0.470585 |
| YDL090C   | YDL090C   | 0.790183 | -0.041284     | -0.312308 |
| YHL022C   | YHL022C   | 0.888585 | 0.242201      | -0.507559 |
| YKL217W   | YKL217W   | 0.882017 | 0.095171      | -0.621602 |
| YGL185C   | YGL185C   | 0.946109 | 0.881844      | -0.050654 |
| YKR066C   | YKR066C   | 1.025034 | 0.91132       | -0.026599 |
| YJR103W   | YJR103W   | 1.067124 | 0.916631      | -0.012947 |
| YPL134C   | YPL134C   | 1.014002 | 0.862032      | 0.00447   |
| YLR142W   | YLR142W   | 1.010006 | 0.816799      | 0.045308  |
| YCR037C   | YCR037C   | 1.023084 | 0.81118       | 0.038704  |
| YEL044W   | YEL044W   | 0.991116 | 0.832672      | 0.08014   |
| YGL183C   | YGL183C   | 0.952034 | 0.767311      | -0.026404 |
| YBR230C   | YBR230C   | 0.892935 | 0.76316       | -0.091499 |
| YLR412C-A | YLR412C-A | 0.890019 | 0.81298       | -0.054856 |
| YGL081W   | YGL081W   | 1.136778 | 0.526974      | 0.151449  |
| YJL155C   | YJL155C   | 1.155024 | 0.552499      | 0.052828  |
| YLR356W   | YLR356W   | 1.129004 | 0.560602      | 0.108706  |
| YJL071W   | YJL071W   | 1.092489 | 0.56018       | 0.082162  |
| YMR094W   | YMR094W   | 1.160889 | 0.638316      | 0.075412  |

|         |         |          |          |           |
|---------|---------|----------|----------|-----------|
| YKL086W | YKL086W | 1.142035 | 0.673786 | 0.124597  |
| YOL084W | YOL084W | 1.132696 | 0.61427  | 0.148361  |
| YDL149W | YDL149W | 1.185467 | 0.659495 | 0.306894  |
| YIL024C | YIL024C | 1.11742  | 0.627506 | 0.220307  |
| YPR036W | YPR036W | 1.066355 | 0.731882 | 0.263468  |
| YML120C | YML120C | 1.088666 | 0.762926 | 0.128583  |
| YDL138W | YDL138W | 1.110095 | 0.72298  | 0.164833  |
| YJR036C | YJR036C | 1.178944 | 0.7529   | 0.138457  |
| YPL113C | YPL113C | 1.171352 | 0.720667 | 0.114903  |
| YIL074C | YIL074C | 1.244388 | 0.77317  | 0.168305  |
| YML087C | YML087C | 1.237079 | 0.686985 | 0.169487  |
| YDR452W | YDR452W | 0.886152 | 0.55767  | 0.04458   |
| YIL046W | YIL046W | 0.837093 | 0.584252 | 0.002653  |
| YLR417W | YLR417W | 0.825852 | 0.557197 | 0.027376  |
| YLR350W | YLR350W | 0.907203 | 0.641615 | 0.020785  |
| YNR058W | YNR058W | 0.886758 | 0.633461 | 0.005521  |
| YBR150C | YBR150C | 0.91409  | 0.524    | 0.02349   |
| YGL036W | YGL036W | 0.890575 | 0.485573 | 0.015498  |
| YOR177C | YOR177C | 0.893837 | 0.500689 | -0.037962 |
| YPR026W | YPR026W | 0.87614  | 0.456565 | -0.018907 |
| YKL171W | YKL171W | 0.837674 | 0.501156 | 0.094123  |
| YKL026C | YKL026C | 0.822128 | 0.459803 | 0.057352  |
| YDL024C | YDL024C | 0.793465 | 0.483795 | -0.02712  |
| YLR189C | YLR189C | 0.775608 | 0.501842 | -0.030236 |
| YBR001C | YBR001C | 0.819745 | 0.525976 | -0.060255 |
| YIL162W | YIL162W | 0.813445 | 0.503346 | 0.017028  |
| YDR022C | YDR022C | 0.835347 | 0.516279 | -0.019088 |
| YKL107W | YKL107W | 0.776387 | 0.59272  | -0.069764 |
| YMR020W | YMR020W | 0.7955   | 0.546233 | 0.005497  |
| YMR147W | YMR147W | 0.761638 | 0.569792 | -0.019936 |
| YMR139W | YMR139W | 0.708373 | 0.514123 | 0.018162  |
| YGR207C | YGR207C | 0.709674 | 0.545402 | 0.024355  |
| YGR080W | YGR080W | 0.6698   | 0.580932 | 0.029934  |
| YOL032W | YOL032W | 0.740201 | 0.607051 | 0.018664  |
| YGL045W | YGL045W | 0.74862  | 0.520836 | 0.126003  |
| YMR114C | YMR114C | 0.715137 | 0.581373 | 0.100723  |
| YAL061W | YAL061W | 1.080048 | 0.63144  | 0.015344  |
| YFL042C | YFL042C | 1.070022 | 0.600394 | -0.016275 |
| YHL024W | YHL024W | 1.045911 | 0.667195 | -0.027581 |
| YKR097W | YKR097W | 0.943387 | 0.652423 | -0.043934 |
| YDL027C | YDL027C | 0.97885  | 0.647415 | -0.060379 |
| YJL045W | YJL045W | 0.959893 | 0.616837 | 0.002423  |
| YML100W | YML100W | 1.017937 | 0.622644 | 0.003245  |
| YGR250C | YGR250C | 0.936389 | 0.749598 | 0.111166  |
| YFL064C | YFL064C | 0.931082 | 0.740061 | 0.099967  |
| YPR155C | YPR155C | 0.965036 | 0.741548 | 0.192373  |
| YDR132C | YDR132C | 0.969367 | 0.754427 | 0.131802  |
| YMR030W | YMR030W | 0.944327 | 0.78541  | 0.146986  |
| YDR358W | YDR358W | 1.018333 | 0.653511 | 0.189238  |

|           |           |          |          |           |
|-----------|-----------|----------|----------|-----------|
| YDL238C   | YDL238C   | 0.978366 | 0.649432 | 0.148495  |
| YKL129C   | YKL129C   | 1.025219 | 0.573397 | 0.178255  |
| YIR014W   | YIR014W   | 1.018121 | 0.564928 | 0.195361  |
| YNL077W   | YNL077W   | 0.979824 | 0.611458 | 0.135164  |
| YCR107W   | YCR107W   | 0.94217  | 0.59097  | 0.159194  |
| YLR260W   | YLR260W   | 0.900669 | 0.607359 | 0.200363  |
| YNR007C   | YNR007C   | 0.953163 | 0.570762 | 0.235159  |
| YBR285W   | YBR285W   | 0.94172  | 0.618527 | 0.232708  |
| YJL070C   | YJL070C   | 0.960937 | 0.508825 | 0.348488  |
| YOR113W   | YOR113W   | 0.963024 | 0.536857 | 0.371851  |
| YCR107W   | YCR107W   | 1.011328 | 0.560049 | 0.300429  |
| YIL107C   | YIL107C   | 0.893802 | 0.522698 | 0.217952  |
| YDL174C   | YDL174C   | 0.913486 | 0.478663 | 0.255499  |
| YFR047C   | YFR047C   | 0.872582 | 0.528302 | 0.138168  |
| YGR097W   | YGR097W   | 0.88382  | 0.501875 | 0.141175  |
| YIR031C   | YIR031C   | 0.803063 | 0.515764 | 0.190921  |
| YOR208W   | YOR208W   | 0.86384  | 0.540229 | 0.311201  |
| YKL124W   | YKL124W   | 0.784504 | 0.516351 | 0.303699  |
| YDR350C   | YDR350C   | 0.799453 | 0.528983 | 0.306911  |
| YIR007W   | YIR007W   | 0.822092 | 0.502518 | 0.274489  |
| YNL074C   | YNL074C   | 0.917302 | 0.425195 | 0.170422  |
| YMR160W   | YMR160W   | 0.867979 | 0.440628 | 0.187692  |
| YPR081C   | YPR081C   | 0.879047 | 0.386579 | 0.248651  |
| YEL072W   | YEL072W   | 0.900306 | 0.35021  | 0.233605  |
| YFL016C   | YFL016C   | 0.913885 | 0.355887 | 0.209021  |
| YIL154C   | YIL154C   | 0.879745 | 0.374802 | 0.194374  |
| YNL092W   | YNL092W   | 0.800537 | 0.395907 | 0.117566  |
| YGR239C   | YGR239C   | 0.806245 | 0.398141 | 0.114831  |
| YDL054C   | YDL054C   | 0.844388 | 0.377671 | 0.146408  |
| YNL223W   | YNL223W   | 0.871289 | 0.349675 | 0.122003  |
| YGL141W   | YGL141W   | 0.782891 | 0.383586 | 0.187871  |
| YEL059C-A | YEL059C-A | 0.764673 | 0.385062 | 0.215634  |
| YAR050W   | YAR050W   | 0.78565  | 0.338906 | 0.218081  |
| YCR063W   | YCR063W   | 0.764622 | 0.39164  | 0.250625  |
| YMR108W   | YMR108W   | 0.831192 | 0.399722 | 0.26184   |
| YJR091C   | YJR091C   | 0.821343 | 0.399253 | 0.272638  |
| YLR128W   | YLR128W   | 0.819945 | 0.363568 | 0.275342  |
| YOL036W   | YOL036W   | 0.779427 | 0.430364 | 0.324494  |
| YGR112W   | YGR112W   | 0.779069 | 0.360068 | 0.323016  |
| YBR241C   | YBR241C   | 1.286382 | 0.394891 | -0.056671 |
| YBR169C   | YBR169C   | 1.204758 | 0.444963 | -0.070752 |
| YIL072W   | YIL072W   | 1.174991 | 0.353256 | -0.188291 |
| YOR100C   | YOR100C   | 1.223167 | 0.34738  | -0.226438 |
| YJR025C   | YJR025C   | 1.203687 | 0.27778  | -0.095241 |
| YKL151C   | YKL151C   | 1.120125 | 0.47562  | -0.130729 |
| YOR386W   | YOR386W   | 1.068739 | 0.405265 | -0.187585 |
| YGL227W   | YGL227W   | 1.017435 | 0.512009 | -0.119218 |
| YKL023W   | YKL023W   | 1.015047 | 0.484131 | -0.127903 |
| YJL037W   | YJL037W   | 1.139261 | 0.529247 | -0.300059 |

|           |           |          |          |           |
|-----------|-----------|----------|----------|-----------|
| YOL048C   | YOL048C   | 1.139063 | 0.575258 | 0.303866  |
| YNL012W   | YNL012W   | 1.110718 | 0.658171 | -0.298804 |
| YLL058W   | YLL058W   | 0.949158 | 0.342221 | 0.001809  |
| YOR184W   | YOR184W   | 0.946694 | 0.368402 | 0.076355  |
| YLL023C   | YLL023C   | 0.983143 | 0.256031 | 0.094348  |
| YJL130C   | YJL130C   | 0.868661 | 0.304314 | 0.075724  |
| YOR215C   | YOR215C   | 0.89009  | 0.302397 | 0.050161  |
| YDR423C   | YDR423C   | 0.903416 | 0.282427 | 0.096083  |
| YOR226C   | YOR226C   | 0.842657 | 0.289175 | 0.068865  |
| YNL269W   | YNL269W   | 0.848042 | 0.263558 | 0.07232   |
| YIR018C-A | YIR018C-A | 1.025414 | 0.177856 | -0.012508 |
| YMR271C   | YMR271C   | 0.99798  | 0.221668 | 0.005056  |
| YDR391C   | YDR391C   | 1.041299 | 0.312647 | -0.132675 |
| YJL105W   | YJL105W   | 1.085328 | 0.280285 | -0.156777 |
| YPR035W   | YPR035W   | 1.053174 | 0.535779 | 0.147424  |
| YMR181C   | YMR181C   | 1.027823 | 0.499305 | 0.125681  |
| YAR042W   | YAR042W   | 0.996051 | 0.542491 | 0.106776  |
| YBR256C   | YBR256C   | 1.117128 | 0.472195 | 0.091479  |
| YCR007C   | YCR007C   | 1.094305 | 0.425895 | 0.114148  |
| YJR151C   | YJR151C   | 1.082374 | 0.41134  | 0.09249   |
| YER039C-A | YER039C-A | 1.08904  | 0.473621 | -0.004792 |
| YKR067W   | YKR067W   | 0.943102 | 0.467276 | 0.025276  |
| YDR085C   | YDR085C   | 0.973096 | 0.461217 | 0.056368  |
| YER061C   | YER061C   | 0.982267 | 0.489825 | 0.011709  |
| YLR345W   | YLR345W   | 0.972745 | 0.481767 | 0.022308  |
| YPR006C   | YPR006C   | 0.959449 | 0.432701 | -0.016602 |
| YML042W   | YML042W   | 1.01768  | 0.517468 | -0.02032  |
| YHL021C   | YHL021C   | 1.001598 | 0.541008 | 0.028181  |
| YKR101W   | YKR101W   | 0.956901 | 0.530851 | -0.036077 |
| YDR255C   | YDR255C   | 0.912978 | 0.261243 | -0.111578 |
| YBL029C-A | YBL029C-A | 0.933231 | 0.294927 | -0.143601 |
| YKL091C   | YKL091C   | 0.855291 | 0.27978  | -0.159633 |
| YOR044W   | YOR044W   | 0.87909  | 0.311355 | -0.12647  |
| YGL208W   | YGL208W   | 0.859363 | 0.358921 | -0.064713 |
| YMR042W   | YMR042W   | 0.898176 | 0.375299 | -0.051638 |
| YHR016C   | YHR016C   | 0.879494 | 0.393923 | 0.027684  |
| YBR126C   | YBR126C   | 0.864229 | 0.411888 | 0.005146  |
| YPL123C   | YPL123C   | 0.91806  | 0.410809 | -0.13847  |
| YNR002C   | YNR002C   | 0.916208 | 0.41625  | -0.169243 |
| YKR011C   | YKR011C   | 0.786404 | 0.457169 | -0.211281 |
| YOL110W   | YOL110W   | 0.80485  | 0.465872 | -0.178732 |
| YAR027W   | YAR027W   | 0.804986 | 0.46639  | -0.104514 |
| YBR046C   | YBR046C   | 0.76371  | 0.400155 | -0.129615 |
| YER092W   | YER092W   | 1.162289 | 0.800751 | -0.290729 |
| YOR220W   | YOR220W   | 0.983114 | 0.816167 | -0.289158 |
| YOR052C   | YOR052C   | 0.986094 | 0.772754 | -0.547507 |
| YLR151C   | YLR151C   | 1.001377 | 0.662104 | -0.488722 |
| YGR087C   | YGR087C   | 0.857261 | 0.827328 | -0.421386 |
| YBR070C   | YBR070C   | 0.83713  | 0.799508 | -0.493406 |
| YLL039C   | YLL039C   | 0.99209  | 0.547101 | -0.323813 |

|           |           |          |           |           |
|-----------|-----------|----------|-----------|-----------|
| YDL130W   | YDL130W   | 0.907984 | 0.601162  | 0.38522   |
| YBL064C   | YBL064C   | 0.800049 | 0.467329  | -0.319136 |
| YJL060W   | YJL060W   | 0.940977 | 0.632725  | -0.183252 |
| YPL060W   | YPL060W   | 0.812251 | 0.65697   | -0.276977 |
| YOL117W   | YOL117W   | 0.857969 | 0.727202  | -0.14425  |
| YBL106C   | YBL106C   | 0.786351 | 0.744866  | -0.141863 |
| YER091C   | YER091C   | 0.912795 | 0.791988  | -0.20597  |
| YLR273C   | YLR273C   | 0.872978 | 0.781666  | -0.179545 |
| YNL191W   | YNL191W   | 0.680276 | 0.768241  | -0.040657 |
| YFL065C   | YFL065C   | 0.731623 | 0.810696  | -0.096454 |
| YER065C   | YER065C   | 0.607262 | 0.831456  | -0.076259 |
| YMR226C   | YMR226C   | 0.693075 | 0.562549  | -0.138461 |
| YEL070W   | YEL070W   | 0.693348 | 0.537659  | -0.214346 |
| YKL067W   | YKL067W   | 0.653262 | 0.623964  | -0.271412 |
| YBR077C   | YBR077C   | 0.710257 | 0.661994  | -0.187309 |
| YLR364W   | YLR364W   | 0.711243 | 0.632295  | -0.214707 |
| YPL188W   | YPL188W   | 1.044743 | 0.437864  | 0.236191  |
| YJR155W   | YJR155W   | 1.021447 | 0.351439  | 0.127644  |
| YDR254W   | YDR254W   | 1.016065 | 0.420913  | 0.086022  |
| YHR029C   | YHR029C   | 1.195355 | 0.364526  | 0.140055  |
| YOR389W   | YOR389W   | 1.204943 | 0.247859  | 0.146578  |
| YDL199C   | YDL199C   | 1.135628 | 0.293484  | 0.222706  |
| YPL278C   | YPL278C   | 1.026999 | 0.235777  | 0.312092  |
| YIL017C   | YIL017C   | 0.984826 | 0.31048   | 0.32888   |
| YMR062C   | YMR062C   | 1.1203   | 0.253631  | 0.355844  |
| YNR069C   | YNR069C   | 1.094711 | 0.311196  | 0.40548   |
| YEL049W   | YEL049W   | 1.053544 | 0.16471   | 0.219588  |
| YER044C-A | YER044C-A | 1.023623 | 0.205459  | 0.176882  |
| YOR178C   | YOR178C   | 1.053549 | 0.09843   | 0.188446  |
| YIL165C   | YIL165C   | 1.024937 | 0.027316  | 0.082942  |
| YJR109C   | YJR109C   | 0.896324 | 0.057567  | 0.217495  |
| YOR302W   | YOR302W   | 0.892851 | 0.047607  | 0.149472  |
| YPL272C   | YPL272C   | 0.859388 | 0.109163  | 0.159569  |
| YPR138C   | YPR138C   | 1.183138 | 0.212706  | 0.294207  |
| YOL058W   | YOL058W   | 1.280412 | 0.119519  | 0.415834  |
| YKL029C   | YKL029C   | 0.836603 | 0.138751  | 0.607009  |
| YLR348C   | YLR348C   | 0.926576 | 0.168163  | 0.540016  |
| YBR208C   | YBR208C   | 0.999836 | 0.056315  | 0.435701  |
| YOR192C   | YOR192C   | 0.621194 | -0.041284 | 0.296815  |
| YGL006W   | YGL006W   | 0.565981 | 0.022014  | 0.183108  |
| YLL019C   | YLL019C   | 0.657986 | 0.074146  | 0.40399   |
| YJR127C   | YJR127C   | 0.533803 | 0.132265  | 0.454976  |
| YIL146C   | YIL146C   | 0.526615 | 0.184867  | 0.459456  |
| YOL064C   | YOL064C   | 0.839878 | 0.210475  | 0.143075  |
| YJL066C   | YJL066C   | 0.870088 | 0.238017  | 0.138687  |
| YOR303W   | YOR303W   | 0.801709 | 0.241372  | 0.175243  |
| YER185W   | YER185W   | 0.824173 | 0.31181   | 0.168859  |
| YLR299W   | YLR299W   | 0.874008 | 0.283532  | 0.251899  |
| YIL077C   | YIL077C   | 0.917482 | 0.296003  | 0.252982  |
| YPL264C   | YPL264C   | 0.912513 | 0.193364  | 0.340127  |



|         |         |          |          |          |
|---------|---------|----------|----------|----------|
| YML002W | YML002W | 0.769347 | 0.149882 | 0.186577 |
| YLL029W | YLL029W | 0.77421  | 0.195243 | 0.159444 |
| YKR096W | YKR096W | 0.656887 | 0.210722 | 0.242554 |
| YPR174C | YPR174C | 0.70807  | 0.202562 | 0.267917 |
| YIR018W | YIR018W | 0.719975 | 0.256673 | 0.267191 |
| YJR154W | YJR154W | 0.722351 | 0.278604 | 0.227509 |
| YDR523C | YDR523C | 0.797083 | 0.204144 | 0.372761 |
| YDR035W | YDR035W | 0.735675 | 0.111872 | 0.33354  |
| YOR130C | YOR130C | 0.78033  | 0.169009 | 0.272508 |
| YCL039W | YCL039W | 0.661805 | 0.356162 | 0.207619 |
| YLL027W | YLL027W | 0.66403  | 0.356883 | 0.224112 |
| YMR301C | YMR301C | 0.64884  | 0.401661 | 0.218619 |
| YNL294C | YNL294C | 0.66536  | 0.381563 | 0.177986 |
| YLR425W | YLR425W | 0.686342 | 0.353684 | 0.175994 |
| YBR225W | YBR225W | 0.753339 | 0.334112 | 0.163004 |
| YOL154W | YOL154W | 0.745044 | 0.360721 | 0.117354 |
| YER040W | YER040W | 0.660331 | 0.340628 | 0.135745 |
| YDR313C | YDR313C | 0.639926 | 0.344491 | 0.151312 |
| YKR021W | YKR021W | 0.650662 | 0.299474 | 0.115122 |
| YNL116W | YNL116W | 0.762514 | 0.47883  | 0.206979 |
| YJR039W | YJR039W | 0.750803 | 0.441322 | 0.218283 |
| YER015W | YER015W | 0.74053  | 0.479782 | 0.234071 |
| YPR030W | YPR030W | 0.731436 | 0.464757 | 0.250691 |
| YHR082C | YHR082C | 0.63274  | 0.428317 | 0.236665 |
| YKR031C | YKR031C | 0.633397 | 0.454192 | 0.241084 |
| YDR475C | YDR475C | 0.650787 | 0.486694 | 0.241377 |
| YDR104C | YDR104C | 0.666525 | 0.483899 | 0.227601 |
| YPR168W | YPR168W | 0.696583 | 0.420239 | 0.260633 |
| YOL025W | YOL025W | 0.652922 | 0.517804 | 0.098983 |
| YDL178W | YDL178W | 0.671546 | 0.537693 | 0.137707 |
| YOR162C | YOR162C | 0.673589 | 0.486348 | 0.173413 |
| YGR237C | YGR237C | 0.645323 | 0.479006 | 0.131874 |
| YDR186C | YDR186C | 0.659073 | 0.497597 | 0.1336   |
| YOL164W | YOL164W | 0.654549 | 0.493407 | 0.117831 |
| YHR164C | YHR164C | 0.576924 | 0.511361 | 0.156824 |
| YDR169C | YDR169C | 0.608993 | 0.501001 | 0.184884 |
| YGL128C | YGL128C | 0.518991 | 0.530357 | 0.255057 |
| YJR052W | YJR052W | 0.484051 | 0.507044 | 0.273634 |
| YER047C | YER047C | 0.577355 | 0.426424 | 0.302335 |
| YBL084C | YBL084C | 0.595973 | 0.480302 | 0.31422  |
| YDL139C | YDL139C | 0.595708 | 0.474896 | 0.275465 |
| YCR100C | YCR100C | 0.54992  | 0.484618 | 0.257613 |
| YJR019C | YJR019C | 0.572061 | 0.445319 | 0.206572 |
| YOL091W | YOL091W | 0.59534  | 0.255557 | 0.270565 |
| YMR265C | YMR265C | 0.567459 | 0.258728 | 0.23161  |
| YGR126W | YGR126W | 0.56534  | 0.251681 | 0.214237 |
| YAL034C | YAL034C | 0.564298 | 0.300951 | 0.280107 |
| YPL164C | YPL164C | 0.550972 | 0.345139 | 0.258162 |
| YGR113W | YGR113W | 0.479245 | 0.226193 | 0.277653 |
| YMR135C | YMR135C | 0.951011 | 0.352034 | 0.415563 |

|         |         |          |           |           |
|---------|---------|----------|-----------|-----------|
| YDR541C | YDR541C | 0.884803 | 0.463204  | 0.595791  |
| YKR102W | YKR102W | 0.595357 | 0.284468  | 0.591786  |
| YOR018W | YOR018W | 0.764406 | 0.480334  | 0.561306  |
| YJL100W | YJL100W | 0.742634 | 0.433836  | 0.584511  |
| YNL144C | YNL144C | 0.705902 | 0.423877  | 0.493434  |
| YFR022W | YFR022W | 0.740657 | 0.402394  | 0.410533  |
| YOR077W | YOR077W | 0.690867 | 0.390151  | 0.388449  |
| YNR065C | YNR065C | 0.72087  | 0.386812  | 0.325778  |
| YER162C | YER162C | 0.733909 | 0.434537  | 0.323612  |
| YOL051W | YOL051W | 0.724742 | 0.441366  | 0.335819  |
| YML076C | YML076C | 0.670445 | 0.41375   | 0.322985  |
| YGR258C | YGR258C | 0.691146 | 0.408519  | 0.334469  |
| YPR002W | YPR002W | 0.67846  | 0.467907  | 0.362775  |
| YCR024C | YCR024C | 0.612769 | 0.360917  | 0.316836  |
| YDR528W | YDR528W | 0.580712 | 0.358707  | 0.381767  |
| YMR253C | YMR253C | 0.707862 | 0.277376  | 0.436816  |
| YGR288W | YGR288W | 0.680275 | 0.315446  | 0.372509  |
| YGL219C | YGL219C | 0.72029  | 0.280519  | 0.332057  |
| YLL063C | YLL063C | 0.737355 | 0.305061  | 0.310217  |
| YMR182C | YMR182C | 0.56691  | -0.092589 | 0.650821  |
| YJL161W | YJL161W | 1.112427 | -0.098702 | -0.090355 |
| YHR018C | YHR018C | 1.097463 | -0.010042 | -0.282741 |
| YBR214W | YBR214W | 1.048822 | 0.08978   | -0.19885  |
| YLL055W | YLL055W | 1.084256 | 0.034793  | -0.084343 |
| YGR019W | YGR019W | 0.756911 | 0.03545   | -0.17009  |
| YJL163C | YJL163C | 0.742659 | -0.065623 | -0.098911 |
| YBR298C | YBR298C | 0.965357 | 0.020371  | -0.242704 |
| YER096W | YER096W | 0.903116 | 0.096143  | -0.207056 |
| YAR066W | YAR066W | 0.867582 | 0.02989   | -0.215754 |
| YIL116W | YIL116W | 0.845978 | -0.160288 | -0.082352 |
| YMR018W | YMR018W | 0.907539 | -0.153467 | 0.050713  |
| YBR183W | YBR183W | 0.926466 | -0.15967  | -0.026584 |
| YBR132C | YBR132C | 0.956762 | -0.269158 | 0.184922  |
| YBR047W | YBR047W | 0.916639 | -0.148777 | 0.278189  |
| YNL104C | YNL104C | 0.777248 | -0.15216  | 0.191172  |
| YGR053C | YGR053C | 0.752639 | -0.138203 | 0.106464  |
| YLR177W | YLR177W | 0.904206 | -0.048365 | 0.145183  |
| YML116W | YML116W | 0.857739 | -0.136079 | 0.139293  |
| YIR019C | YIR019C | 0.647143 | -0.018034 | 0.106158  |
| YOR316C | YOR316C | 0.663918 | -0.065329 | 0.16934   |
| YHL006C | YHL006C | 0.724924 | -0.028565 | 0.128995  |
| YOR032W | YOR032W | 0.585149 | -0.072346 | 0.074312  |
| YAL002W | YAL002W | 0.593642 | -0.046103 | 0.105006  |
| YDR127W | YDR127W | 0.676811 | -0.068427 | 0.026518  |
| YIL164C | YIL164C | 0.686601 | -0.036841 | -0.011433 |
| YER066W | YER066W | 0.701785 | 0.018448  | -0.028866 |
| YML117W | YML117W | 0.727407 | -0.018494 | -0.034254 |
| YMR251W | YMR251W | 0.684227 | -0.14025  | -0.001341 |
| YGR070W | YGR070W | 0.628337 | -0.222661 | 0.002256  |
| YGR045C | YGR045C | 0.605165 | -0.19431  | -0.00647  |

|           |           |          |           |           |
|-----------|-----------|----------|-----------|-----------|
| YPL006W   | YPL006W   | 0.586025 | 0.036993  | 0.038581  |
| YIL088C   | YIL088C   | 0.576831 | -0.052844 | -0.022622 |
| YBR233W   | YBR233W   | 0.628194 | -0.054141 | -0.004612 |
| YOR173W   | YOR173W   | 0.635113 | -0.081923 | -0.048003 |
| YDR270W   | YDR270W   | 0.535447 | -0.175195 | -0.006447 |
| YOR081C   | YOR081C   | 0.621488 | -0.1019   | -0.15413  |
| YLR034C   | YLR034C   | 0.557415 | -0.117486 | -0.134807 |
| YAL017W   | YAL017W   | 0.644572 | -0.083116 | -0.284143 |
| YKR049C   | YKR049C   | 0.659206 | -0.169805 | -0.259712 |
| YPL257W   | YPL257W   | 0.575563 | -0.290897 | -0.237339 |
| YNR001C   | YNR001C   | 0.835871 | 0.09965   | 0.025909  |
| YDR479C   | YDR479C   | 0.758988 | 0.148139  | 0.093184  |
| YOL140W   | YOL140W   | 0.769097 | 0.161215  | 0.067367  |
| YCR069W   | YCR069W   | 0.648985 | 0.061656  | 0.026119  |
| YAL031C   | YAL031C   | 0.671957 | 0.06073   | 0.013513  |
| YHR198C   | YHR198C   | 0.679071 | 0.140465  | 0.051539  |
| YBR128C   | YBR128C   | 0.649162 | 0.136315  | 0.071388  |
| YMR053C   | YMR053C   | 0.828506 | 0.206417  | -0.09831  |
| YDL216C   | YDL216C   | 0.785739 | 0.188184  | -0.049739 |
| YMR019W   | YMR019W   | 0.705654 | 0.105397  | -0.030237 |
| YLL041C   | YLL041C   | 0.704188 | 0.090088  | -0.102415 |
| YHR006W   | YHR006W   | 0.694044 | 0.384871  | 0.078626  |
| YBR035C   | YBR035C   | 0.681442 | 0.411983  | 0.066884  |
| YDR436W   | YDR436W   | 0.701215 | 0.499668  | 0.089     |
| YPL230W   | YPL230W   | 0.694019 | 0.486134  | 0.086743  |
| YOR350C   | YOR350C   | 0.697096 | 0.460254  | 0.072359  |
| YMR278W   | YMR278W   | 0.706045 | 0.401434  | 0.02805   |
| YOR059C   | YOR059C   | 0.727356 | 0.41682   | 0.015696  |
| YDL035C   | YDL035C   | 0.689415 | 0.387173  | -0.040217 |
| YJL141C   | YJL141C   | 0.717176 | 0.374218  | -0.028346 |
| YIL097W   | YIL097W   | 0.761334 | 0.428919  | -0.055043 |
| YPL109C   | YPL109C   | 0.745653 | 0.426795  | -0.017391 |
| YKL065C   | YKL065C   | 0.728626 | 0.478298  | -0.019887 |
| YAR028W   | YAR028W   | 0.729349 | 0.465076  | -0.023449 |
| YDR191W   | YDR191W   | 0.711605 | 0.465276  | -0.022777 |
| YFL041W-  | YFL041W-  | 0.733267 | 0.457053  | 0.019081  |
| YEL012W   | YEL012W   | 0.766935 | 0.357536  | 0.046376  |
| YJL048C   | YJL048C   | 0.791764 | 0.395257  | 0.030323  |
| YLR312C-B | YLR312C-B | 0.771005 | 0.377709  | 0.00474   |
| YGL181W   | YGL181W   | 0.632044 | 0.475256  | 0.060042  |
| YKL094W   | YKL094W   | 0.573746 | 0.498888  | 0.024055  |
| YNL014W   | YNL014W   | 0.601777 | 0.477578  | 0.027808  |
| YOR152C   | YOR152C   | 0.611727 | 0.499225  | 0.013987  |
| YKL104C   | YKL104C   | 0.573801 | 0.358568  | 0.101818  |
| YPL174C   | YPL174C   | 0.603308 | 0.361553  | 0.106251  |
| YCR026C   | YCR026C   | 0.590847 | 0.387899  | 0.081455  |
| YLR257W   | YLR257W   | 0.582456 | 0.375314  | 0.091129  |
| YDR383C   | YDR383C   | 0.591796 | 0.444481  | 0.14362   |
| YNL242W   | YNL242W   | 0.624529 | 0.410285  | 0.114073  |
| YDR058C   | YDR058C   | 0.699754 | 0.509971  | -0.07543  |

|           |           |          |          |           |
|-----------|-----------|----------|----------|-----------|
| YAL053W   | YAL053W   | 0.62956  | 0.509783 | 0.076422  |
| YNL115C   | YNL115C   | 0.694435 | 0.42947  | -0.072768 |
| YMR009W   | YMR009W   | 0.703049 | 0.430003 | -0.061247 |
| YKL045W   | YKL045W   | 0.66072  | 0.453875 | -0.025141 |
| YLR456W   | YLR456W   | 0.646774 | 0.458811 | -0.03463  |
| YDR178W   | YDR178W   | 0.647255 | 0.39088  | -0.080971 |
| YMR110C   | YMR110C   | 0.637669 | 0.429177 | -0.121809 |
| YOR022C   | YOR022C   | 0.632565 | 0.471404 | -0.130392 |
| YER035W   | YER035W   | 0.578698 | 0.416929 | -0.014538 |
| YIL007C   | YIL007C   | 0.540788 | 0.426193 | 0.003844  |
| YLR247C   | YLR247C   | 0.542112 | 0.436357 | -0.031952 |
| YBR240C   | YBR240C   | 0.561361 | 0.363311 | -0.085969 |
| YGR204W   | YGR204W   | 0.69323  | 0.211582 | -0.009774 |
| YLR011W   | YLR011W   | 0.668982 | 0.262527 | 0.00965   |
| YOR202W   | YOR202W   | 0.717327 | 0.198494 | 0.044077  |
| YGL215W   | YGL215W   | 0.671668 | 0.205455 | 0.070118  |
| YBL015W   | YBL015W   | 0.747799 | 0.276321 | 0.069803  |
| YEL076C-A | YEL076C-A | 0.770045 | 0.217755 | 0.05276   |
| YLR001C   | YLR001C   | 0.66106  | 0.324275 | -0.010485 |
| YKL211C   | YKL211C   | 0.660756 | 0.314131 | -0.025448 |
| YKL157W   | YKL157W   | 0.663763 | 0.296229 | -0.046085 |
| YPL166W   | YPL166W   | 0.648425 | 0.321458 | -0.057896 |
| YFL010C   | YFL010C   | 0.682652 | 0.336264 | -0.06877  |
| YDL234C   | YDL234C   | 0.641924 | 0.369688 | 0.014474  |
| YKL133C   | YKL133C   | 0.633144 | 0.334711 | 0.001511  |
| YBR248C   | YBR248C   | 0.701947 | 0.337698 | 0.013052  |
| YPL191C   | YPL191C   | 0.735005 | 0.318631 | -0.033382 |
| YNL241C   | YNL241C   | 0.718125 | 0.308207 | -0.055246 |
| YDR078C   | YDR078C   | 0.739559 | 0.334695 | -0.081179 |
| YNL093W   | YNL093W   | 0.614381 | 0.277152 | -0.019299 |
| YDR506C   | YDR506C   | 0.625395 | 0.263215 | -0.00256  |
| YDR476C   | YDR476C   | 0.626092 | 0.247981 | 0.050717  |
| YFR016C   | YFR016C   | 0.591159 | 0.266665 | 0.039515  |
| YER004W   | YER004W   | 0.591986 | 0.315014 | 1.49E-04  |
| YDR074W   | YDR074W   | 0.583186 | 0.350046 | 0.028166  |
| YAR031W   | YAR031W   | 0.564029 | 0.188968 | 0.059759  |
| YHR162W   | YHR162W   | 0.496786 | 0.193243 | -0.050497 |
| YNL103W   | YNL103W   | 0.498302 | 0.154889 | 0.012203  |
| YLL056C   | YLL056C   | 0.60499  | 0.153152 | -0.039586 |
| YDL086W   | YDL086W   | 0.564803 | 0.149282 | -0.073255 |
| YPL176C   | YPL176C   | 0.507913 | 0.266854 | -0.086298 |
| YLR454W   | YLR454W   | 0.478648 | 0.240529 | -0.077376 |
| YPL236C   | YPL236C   | 0.484881 | 0.04149  | 0.00125   |
| YOR193W   | YOR193W   | 0.425229 | 0.128259 | -0.079949 |
| YKL064W   | YKL064W   | 0.584997 | 0.279473 | 0.151076  |
| YOL009C   | YOL009C   | 0.566629 | 0.266666 | 0.127476  |
| YBR136W   | YBR136W   | 0.562806 | 0.260752 | 0.165813  |
| YHL018W   | YHL018W   | 0.547182 | 0.345306 | 0.158555  |
| YKR054C   | YKR054C   | 0.463849 | 0.292818 | 0.103726  |
| YNL148C   | YNL148C   | 0.50192  | 0.302085 | 0.096515  |

|           |           |          |           |           |
|-----------|-----------|----------|-----------|-----------|
| YHR099W   | YHR099W   | 0.483498 | 0.281462  | 0.191462  |
| YKL203C   | YKL203C   | 0.481823 | 0.420082  | 0.14131   |
| YGL206C   | YGL206C   | 0.542943 | 0.371285  | 0.053108  |
| YFL041W   | YFL041W   | 0.472184 | 0.363991  | 0.036445  |
| YKR034W   | YKR034W   | 0.439557 | 0.262326  | 0.023869  |
| YCR032W   | YCR032W   | 0.390897 | 0.374289  | 0.021102  |
| YGL053W   | YGL053W   | 0.70292  | 0.15773   | -0.309933 |
| YMR196W   | YMR196W   | 0.729957 | 0.139779  | -0.299056 |
| YMR315W   | YMR315W   | 0.581139 | 0.005065  | -0.297006 |
| YER039C   | YER039C   | 0.658019 | 0.03216   | -0.272236 |
| YLR156W   | YLR156W   | 0.687946 | -0.006232 | -0.209862 |
| YBR006W   | YBR006W   | 0.635928 | 0.056828  | -0.193555 |
| YAL001C   | YAL001C   | 0.550178 | 0.105731  | -0.194594 |
| YPR007C   | YPR007C   | 0.548947 | 0.082577  | -0.257611 |
| YBR076W   | YBR076W   | 0.451802 | 0.151175  | -0.313629 |
| YBL091C-A | YBL091C-A | 0.623323 | 0.231421  | -0.24542  |
| YJR008W   | YJR008W   | 0.673995 | 0.28283   | -0.275076 |
| YNL006W   | YNL006W   | 0.658405 | 0.28475   | -0.250896 |
| YHR161C   | YHR161C   | 0.707763 | 0.227858  | -0.135645 |
| YCR091W   | YCR091W   | 0.719086 | 0.25168   | -0.164835 |
| YLR211C   | YLR211C   | 0.716051 | 0.299954  | -0.144395 |
| YIL050W   | YIL050W   | 0.75505  | 0.244964  | -0.217685 |
| YAL062W   | YAL062W   | 0.730282 | 0.246295  | -0.229944 |
| YJL185C   | YJL185C   | 0.639832 | 0.228435  | -0.077771 |
| YPR196W   | YPR196W   | 0.610963 | 0.242417  | -0.143186 |
| YPR079W   | YPR079W   | 0.635556 | 0.217538  | -0.132211 |
| YKR089C   | YKR089C   | 0.680805 | 0.183049  | -0.10222  |
| YPR201W   | YPR201W   | 0.696521 | 0.190369  | -0.160795 |
| YGL250W   | YGL250W   | 0.58896  | 0.167738  | -0.17094  |
| YOR136W   | YOR136W   | 0.59268  | 0.370343  | -0.162238 |
| YDL059C   | YDL059C   | 0.650068 | 0.330581  | -0.139622 |
| YKL193C   | YKL193C   | 0.668065 | 0.359615  | -0.161929 |
| YFR024C-A | YFR024C-A | 0.659291 | 0.333679  | -0.219687 |
| YDL223C   | YDL223C   | 0.641747 | 0.300869  | -0.170029 |
| YOR347C   | YOR347C   | 0.681784 | 0.389476  | -0.259869 |
| YKL208W   | YKL208W   | 0.565007 | 0.422599  | -0.257768 |
| YKR013W   | YKR013W   | 0.454937 | 0.515898  | -0.181775 |
| YAR035W   | YAR035W   | 0.613453 | 0.393402  | -0.373743 |
| YBR149W   | YBR149W   | 0.623446 | 0.281616  | -0.367106 |
| YGR244C   | YGR244C   | 0.719554 | 0.330664  | -0.392958 |
| YHR138C   | YHR138C   | 0.633966 | 0.45974   | -0.533666 |
| YOR020W   | YOR020W   | 0.651711 | 0.525487  | -0.414666 |

**Table S5: List of Group 2 AA genes**

1810 = SWI2 Anchor away; 1854= SWI2 Anchor away sir3 null mutant; 1853 = sir3 null in Anchor away background; 1809 = Wildtype Anchor away background. \_R = with Rapamycin

| <b>YORF</b> | <b>NAME</b> | <b>1810_R1-1809_R</b> | <b>1854_R1-1809_R</b> | <b>1853_R-1809_R</b> |
|-------------|-------------|-----------------------|-----------------------|----------------------|
| YFR027W     | ECO1        | 1.066789              | -0.045791             | -0.669208            |
| YML108W     | null        | 1.029809              | -0.137468             | -0.538262            |
| YPR148C     | null        | 1.267408              | -0.077573             | -0.522108            |
| YOL108C     | INO4        | 1.16215               | -0.019617             | -0.617004            |
| YDL101C     | DUN1        | 1.180908              | 0.008541              | -0.527505            |
| YLR420W     | URA4        | 1.285333              | 5.47E-04              | -0.319895            |
| YOR357C     | SNX3        | 1.25215               | 0.03339               | -0.412955            |
| YDL135C     | RDI1        | 1.203921              | -0.001992             | -0.216348            |
| YMR263W     | SAP30       | 1.102979              | -0.021424             | -0.273703            |
| YLR312C-B   | null        | 1.01248               | -0.193766             | -0.110078            |
| YDR308C     | SRB7        | 1.040916              | -0.11343              | -0.102671            |
| YNR029C     | null        | 1.050316              | -0.128786             | -0.059821            |
| YMR029C     | FAR8        | 1.002667              | -0.058155             | -0.084481            |
| YBR014C     | GRX7        | 1.082561              | -0.200944             | -0.265018            |
| YCR082W     | AHC2        | 1.088685              | -0.130606             | -0.218864            |
| YDR130C     | FIN1        | 1.06606               | -0.17393              | -0.215208            |
| YKL089W     | MIF2        | 1.140109              | -0.213645             | -0.15261             |
| YFL034C-A   | RPL22B      | 1.033232              | -0.217076             | -0.193786            |
| YKR035W-    | DID2        | 1.016133              | -0.253712             | -0.24015             |
| YER030W     | CHZ1        | 1.607177              | 0.09653               | -0.370041            |
| YJR022W     | LSM8        | 1.538216              | 0.107655              | -0.395975            |
| YPR188C     | MLC2        | 1.639887              | -0.114558             | -0.278256            |
| YOR195W     | SLK19       | 1.516348              | -0.219008             | -0.286149            |
| YOR194C     | TOA1        | 1.286919              | -0.006988             | 0.012911             |
| YGR135W     | PRE9        | 1.238083              | 0.063397              | -0.014367            |
| YPR100W     | MRPL51      | 1.361305              | 0.102015              | 0.122359             |
| YDR315C     | IPK1        | 1.432264              | 0.036723              | 0.137238             |
| YPR073C     | LTP1        | 1.425334              | 0.088795              | 0.090258             |
| YDR079C-    | TFB5        | 1.311372              | -0.059416             | 0.088674             |
| YBL090W     | MRP21       | 1.31457               | 0.003371              | 0.235119             |
| YIL063C     | YRB2        | 1.424641              | 0.128045              | -0.006819            |
| YDL216C     | RRI1        | 1.484604              | 0.244172              | -0.107044            |
| YKR029C     | SET3        | 1.084159              | 0.502969              | -0.199273            |
| YNL050C     | null        | 1.113443              | 0.55606               | -0.237633            |
| YLR262C     | YPT6        | 1.201175              | 0.424257              | -0.27768             |
| YGL244W     | RTF1        | 1.064341              | 0.308883              | -0.407579            |
| YER170W     | ADK2        | 1.086861              | 0.311351              | -0.253826            |
| YOR094W     | ARF3        | 1.03361               | 0.259975              | -0.280725            |
| YDR162C     | NBP2        | 1.090693              | 0.510215              | -0.584332            |
| YPL045W     | VPS16       | 1.015906              | 0.632306              | -0.45783             |
| YIL138C     | TPM2        | 1.682786              | 0.306056              | -0.690793            |
| YDL161W     | ENT1        | 1.34342               | 0.389242              | -0.723547            |
| YLR148W     | PEP3        | 1.353599              | 0.187139              | -0.569213            |
| YER159C     | BUR6        | 1.670063              | 0.437402              | -0.210862            |
| YEL021W     | URA3        | 1.632845              | 0.262002              | -0.268966            |

|                |          |           |           |
|----------------|----------|-----------|-----------|
| YMR075W RCO1   | 1.387032 | 0.269948  | 0.390184  |
| YNL122C null   | 1.014566 | -0.117233 | 0.197204  |
| YGL029W CGR1   | 1.054287 | -0.134631 | 0.052386  |
| YMR039C SUB1   | 1.12259  | -0.285114 | 0.368477  |
| YKR060W UTP30  | 1.097246 | -0.373862 | 0.244983  |
| YOR305W RRG7   | 1.281278 | -0.420408 | 0.031223  |
| YJL140W RPB4   | 1.223792 | -0.318465 | 0.080238  |
| YJR057W CDC8   | 1.020569 | -0.374342 | -0.112441 |
| YBR098W MMS4   | 1.162837 | 0.177413  | 0.094098  |
| YMR188C MRPS17 | 1.092885 | 0.22016   | 0.045758  |
| YJL155C FBP26  | 1.093268 | 0.238717  | 0.093247  |
| YMR158W MRPS8  | 1.031525 | 0.153426  | 0.08375   |
| YDR004W RAD57  | 1.060236 | 0.106427  | 0.072368  |
| YKL082C RRP14  | 1.108827 | 0.094592  | 0.006446  |
| YDR494W RSM28  | 1.004573 | 0.313237  | 0.0797    |
| YPR131C NAT3   | 1.011685 | 0.308937  | -0.040734 |
| YJL162C JJJ2   | 1.080659 | 0.360894  | 0.010818  |
| YNL084C END3   | 1.090977 | 0.101192  | -0.099086 |
| YML015C TAF11  | 1.04558  | 0.105481  | -0.175426 |
| YGR029W ERV1   | 1.092301 | 0.227575  | -0.105768 |
| YER048C CAJ1   | 1.047871 | 0.271252  | -0.17278  |
| YOR266W PNT1   | 1.049498 | 0.285775  | -0.183032 |
| YGL230C null   | 1.258502 | 0.156629  | -0.213166 |
| YLR051C FCF2   | 1.280758 | 0.207603  | -0.12482  |
| YNR032C HUB1   | 1.214463 | 0.103032  | -0.10574  |
| YCL055W KAR4   | 1.211781 | 0.277987  | -0.020767 |
| YDL235C YPD1   | 1.260954 | 0.268571  | -0.070049 |
| YJL085W EXO70  | 1.179199 | 0.305385  | -0.089646 |
| YDL099W BUG1   | 1.234792 | 0.341265  | -0.154571 |
| YMR200W ROT1   | 1.204718 | 0.45217   | 0.002839  |
| YJL072C PSF2   | 1.166446 | 0.463231  | -0.036795 |
| YGL058W RAD6   | 1.061177 | 0.473075  | 0.046744  |
| YPL108W null   | 1.126847 | 0.43002   | 0.041395  |
| YGR287C IMA1   | 1.13376  | 0.542336  | 0.029656  |
| YGL158W RCK1   | 1.048703 | 0.481122  | -0.036415 |
| YDL002C NHP10  | 1.079376 | 0.467327  | -0.040343 |
| YDR140W MTQ2   | 1.088689 | 0.467984  | -0.007828 |
| YGR240C null   | 1.112271 | 0.503602  | -0.062786 |
| YOL023W IFM1   | 1.026897 | 0.570025  | -0.089091 |
| YDR393W SHE9   | 1.033013 | 0.402441  | -0.174446 |
| YPR051W MAK3   | 1.290515 | 0.328365  | 0.088339  |
| YGR196C FYV8   | 1.312014 | 0.364993  | 0.065092  |
| YBR111W SUS1   | 1.372997 | 0.313199  | 0.013141  |
| YPL052W OAZ1   | 1.1649   | 0.287288  | 0.032563  |
| YKR014C YPT52  | 1.199055 | 0.350467  | 0.081193  |
| YNL306W MRPS18 | 1.20091  | 0.284713  | 0.108797  |
| YPL051W ARL3   | 1.289894 | 0.507288  | 0.138563  |
| YDR056C null   | 1.182859 | 0.504021  | 0.170293  |
| YGR215W RSM27  | 1.131787 | 0.178328  | 0.231714  |
| YKL138C MRPL31 | 1.079247 | 0.208727  | 0.219332  |

|           |        |          |          |           |
|-----------|--------|----------|----------|-----------|
| YCR071C   | IMG2   | 1.111693 | 0.307811 | 0.281549  |
| YLR312W-  | MRPL15 | 1.190386 | 0.342826 | 0.324444  |
| YDR337W   | MRPS28 | 1.09922  | 0.421759 | 0.167552  |
| YPR020W   | ATP20  | 1.0745   | 0.346415 | 0.162848  |
| YDL119C   | null   | 1.019403 | 0.384499 | 0.20403   |
| YLR257W   | null   | 1.103853 | 0.045546 | 0.384654  |
| YLR353W   | BUD8   | 1.16627  | 0.068854 | 0.30876   |
| YBR035C   | PDX3   | 1.124083 | 0.174003 | 0.417988  |
| YLL009C   | COX17  | 1.018919 | 0.197931 | 0.401414  |
| YPR072W   | NOT5   | 1.064522 | 0.078616 | 0.260964  |
| YKL053C-A | MDM35  | 1.025934 | 0.14345  | 0.201852  |
| YBL038W   | MRPL16 | 1.09796  | 0.216539 | 0.324062  |
| YOL133W   | HRT1   | 1.066203 | 0.142261 | 0.354629  |
| YGR168C   | null   | 1.028826 | 0.142986 | 0.296027  |
| YHR207C   | SET5   | 1.064848 | 0.256471 | 0.286648  |
| YOR166C   | SWT1   | 1.018944 | 0.250358 | 0.263306  |
| YMR299C   | DYN3   | 1.445678 | 0.274948 | 0.279285  |
| YHL022C   | SPO11  | 1.539086 | 0.169963 | 0.328393  |
| YDL200C   | MGT1   | 1.517248 | 0.123993 | 0.284844  |
| YJL127C-B | null   | 1.303283 | 0.155014 | 0.26686   |
| YDR468C   | TLG1   | 1.333146 | 0.169745 | 0.239176  |
| YDR243C   | PRP28  | 1.291768 | 0.201127 | 0.195965  |
| YOR148C   | SPP2   | 1.309947 | 0.185429 | 0.370267  |
| YMR132C   | JLP2   | 1.343667 | 0.267558 | 0.316044  |
| YDR318W   | MCM21  | 1.408467 | 0.206356 | 0.359363  |
| YKL137W   | CMC1   | 1.396391 | 0.152925 | 0.454729  |
| YDR272W   | GLO2   | 1.406336 | 0.264159 | 0.508817  |
| YOL017W   | ESC8   | 1.290712 | 0.085347 | 0.530284  |
| YJR082C   | EAF6   | 1.289898 | 0.193897 | 0.578618  |
| YKL002W   | DID4   | 1.165457 | 0.127193 | 0.593513  |
| YGR153W   | null   | 2.636502 | 0.65501  | -0.717081 |
| YNL056W   | OCA2   | 2.209609 | 0.202457 | 0.243769  |
| YCR020W-  | HTL1   | 2.43541  | 0.626473 | 0.604439  |
| YLR025W   | SNF7   | 1.549937 | 0.602071 | -0.037162 |
| YML062C   | MFT1   | 1.467596 | 0.50822  | -0.069654 |
| YOR078W   | BUD21  | 1.433841 | 0.437274 | -0.129684 |
| YMR284W   | YKU70  | 1.38401  | 0.491141 | -0.018359 |
| YKL160W   | ELF1   | 1.4777   | 0.386218 | 0.03296   |
| YJL013C   | MAD3   | 1.470005 | 0.373521 | 0.130819  |
| YDR289C   | RTT103 | 1.539179 | 0.401045 | 0.156093  |
| YJR011C   | null   | 1.612044 | 0.511631 | 0.185125  |
| YMR197C   | VTI1   | 1.531006 | 0.565154 | 0.129688  |
| YDR068W   | DOS2   | 1.553337 | 0.561149 | 0.133572  |
| YDR168W   | CDC37  | 1.535247 | 0.585925 | 0.192948  |
| YLR170C   | APS1   | 1.752593 | 0.476661 | 0.012479  |
| YJL179W   | PFD1   | 1.907616 | 0.404717 | 0.135655  |
| YOL086W-  | MHF1   | 2.026676 | 0.363643 | 0.046947  |
| YKL138C-A | HSK3   | 1.988677 | 0.5422   | -0.05758  |
| YDR371W   | CTS2   | 1.884904 | 0.719605 | 0.198772  |



|                |          |           |           |
|----------------|----------|-----------|-----------|
| YKLO45W-PR12   | 1.926462 | 0.714535  | 0.301464  |
| YDR357C CNL1   | 1.963634 | 0.278897  | 0.668585  |
| YBL001C ECM15  | 1.897314 | 0.4213    | 0.630408  |
| YOR193W PEX27  | 1.664403 | 0.370363  | 0.792536  |
| YHR018C ARG4   | 1.744191 | 0.212447  | 0.764307  |
| YBR253W SRB6   | 1.66342  | 0.413677  | 0.451705  |
| YGL005C COG7   | 1.550437 | 0.465454  | 0.355049  |
| YOR189W IES4   | 1.532081 | 0.3796    | 0.363025  |
| YNL032W SIW14  | 1.494743 | 0.417652  | 0.358942  |
| YLR168C UPS2   | 1.598847 | 0.20454   | 0.302982  |
| YDR248C null   | 1.683574 | 0.18974   | 0.364874  |
| YBR258C SHG1   | 1.804436 | 0.157961  | 0.368224  |
| YDR363W-SEM1   | 1.711634 | 0.394     | 0.251605  |
| YBL031W SHE1   | 1.756326 | 0.242941  | 0.215874  |
| YLR298C YHC1   | 1.797467 | 0.789333  | 0.641127  |
| YFR011C MIC19  | 1.778927 | 0.810115  | 0.444434  |
| YJR088C EMC2   | 1.827402 | 0.689866  | 0.51358   |
| YDR163W CWC15  | 1.651898 | 0.668288  | 0.458456  |
| YOR279C RFM1   | 1.514079 | 0.64749   | 0.516194  |
| YBR230W-null   | 1.661016 | 0.709246  | 0.584007  |
| YGL185C null   | 1.6241   | 0.77675   | 0.646675  |
| YIL161W null   | 1.572165 | 0.753236  | 0.577457  |
| YEL003W GIM4   | 1.548492 | 0.730687  | 0.626362  |
| YOR319W HSH49  | 1.712134 | 0.544794  | 0.677793  |
| YFL059W SNZ3   | 1.798037 | 0.512656  | 0.610341  |
| YLR040C AFB1   | 1.996371 | -2.293769 | -1.185353 |
| YHR152W SPO12  | 1.14144  | -0.283468 | -0.833568 |
| YNL166C BNI5   | 1.037201 | -0.219385 | -0.741169 |
| YLR200W YKE2   | 1.154765 | -0.007324 | -0.892606 |
| YIL117C PRM5   | 1.086923 | -0.035356 | -0.952209 |
| YKR095W-PCC1   | 1.031575 | -0.123828 | -1.05424  |
| YPR046W MCM16  | 1.311028 | -0.342763 | -1.06318  |
| YBR138C null   | 1.670686 | 0.301455  | -1.132607 |
| YFL065C null   | 1.158689 | 0.484584  | -1.018472 |
| YBR233W-DAD3   | 1.797092 | -0.67985  | -0.451534 |
| YDR501W PLM2   | 1.07483  | -0.321768 | -0.580323 |
| YAL034W-MTW1   | 1.072017 | -0.468353 | -0.543572 |
| YKL216W URA1   | 1.345975 | -0.577883 | -0.551034 |
| YOL113W SKM1   | 1.033519 | -0.587046 | -0.721315 |
| YIL008W URM1   | 1.138537 | -0.63178  | -0.890334 |
| YNL079C TPM1   | 1.001356 | -0.43739  | -0.914134 |
| YNL129W NRK1   | 1.184104 | -0.836755 | -0.805896 |
| YDR378C LSM6   | 1.096922 | -0.892641 | -0.563517 |
| YFL060C SNO3   | 1.033389 | -0.973829 | -0.694433 |
| YLR154C RNH203 | 1.121341 | -0.376784 | -1.473617 |
| YOR216C RUD3   | 1.013053 | -0.203636 | -1.384204 |
| YNL188W KAR1   | 1.113291 | -0.931413 | -1.394805 |
